# Supplementary material
Source: publisher figshare collection journal article supplement (https://gsajournals.figshare.com/articles/dataset/_/9696170)

Identification of quantitative trait loci for component traits of flowering capacity across temperature in *Petunia*.

### **Supplemental Table and Figures**

QiuXia C. Chen, Yufang Guo, and Ryan M. Warner<sup>1</sup>

Department of Horticulture, Michigan State University, 1066 Bogue Street, East Lansing, MI 48824

<sup>1</sup>Corresponding author. ORCID 0000-0003-1780-0146. Email address: warnerry@msu.edu

Supplementary Table S1. Pearson's correlation coefficients at different air temperature treatments for traits measured in *P. axillaris* × *P. exserta* F<sub>7</sub> recombinant inbred line population in 2014-15 and 2015-16.

| Trait <sup>z</sup> | DRate   | DTA     | FIBud   | FIBudLS | FIBudPS | Branch  | FIBranch | FIDiam  | Nodes   | HghtFI  | Internode | LLeng  |
|--------------------|---------|---------|---------|---------|---------|---------|----------|---------|---------|---------|-----------|--------|
| Temperature 14 °C  |         |         |         |         |         |         |          |         |         |         |           |        |
| DTA                | -0.64** |         |         |         |         |         |          |         |         |         |           |        |
| FIBud              | -0.44** | 0.62**  |         |         |         |         |          |         |         |         |           |        |
| FIBudLS            | -0.04   | 0.07    | 0.31**  |         |         |         |          |         |         |         |           |        |
| FIBudPS            | -0.48** | 0.46**  | 0.65**  | 0.57**  |         |         |          |         |         |         |           |        |
| Branch             | 0.26**  | -0.23** | -0.1*   | -0.09*  | -0.07*  |         |          |         |         |         |           |        |
| FIBranch           | -0.21** | 0.27**  | 0.45**  | -0.09*  | 0.41**  | 0.51**  |          |         |         |         |           |        |
| FIDiam             | -0.19** | 0.10*   | 0.31**  | 0.08    | 0.18**  | -0.18** | -0.06    |         |         |         |           |        |
| Nodes              | 0.33**  | 0.11**  | 0.12**  | 0.16**  | -0.04   | 0.14**  | 0.00     | -0.02   |         |         |           |        |
| HghtFI             | 0.14**  | -0.14** | -0.12** | 0.35**  | 0.06    | 0.41**  | 0.05     | 0.12**  | 0.29**  |         |           |        |
| Internode          | -0.04   | -0.18** | -0.17** | 0.25**  | 0.11**  | 0.35**  | 0.08*    | 0.14**  | -0.18** | 0.88**  |           |        |
| LLeng              | -0.15** | 0.03    | -0.26** | -0.13*  | -0.04   | 0.07*   | -0.01    | -0.15** | -0.56** | -0.14** | 0.13**    |        |
| LWid               | -0.11** | -0.06   | -0.30** | 0.06    | -0.03   | 0.18**  | 0.04     | -0.24** | -0.51** | 0.04    | 0.29**    | 0.80** |
| Temperature 17 °C  |         |         |         |         |         |         |          |         |         |         |           |        |
| DTA                | -0.50** |         |         |         |         |         |          |         |         |         |           |        |
| FIBud              | -0.21** | 0.64**  |         |         |         |         |          |         |         |         |           |        |
| FIBudLS            | 0.13*   | -0.25** | 0.31**  |         |         |         |          |         |         |         |           |        |
| FIBudPS            | -0.26** | 0.63**  | 0.77**  | 0.46**  |         |         |          |         |         |         |           |        |
| Branch             | -0.03   | 0.13**  | 0.22**  | -0.01** | 0.22**  |         |          |         |         |         |           |        |
| FIBranch           | -0.18** | 0.50**  | 0.66**  | -0.01   | 0.60**  | 0.60**  |          |         |         |         |           |        |
| FIDiam             | -0.12** | 0.22**  | 0.29**  | -0.18** | 0.19**  | -0.06   | 0.12**   |         |         |         |           |        |
| Nodes              | 0.35**  | 0.13**  | 0.12**  | 0.05    | 0.05    | 0.16**  | 0.01     | 0.06    |         |         |           |        |
| HghtFI             | 0.03    | -0.02   | -0.08*  | 0.26**  | 0.01    | 0.27**  | -0.05    | 0.08*   | 0.43**  |         |           |        |
| Internode          | -0.18** | -0.08*  | -0.13** | 0.23**  | 0.01    | 0.21**  | -0.04    | 0.06    | -0.1*   | 0.85**  |           |        |
| LLeng              | -0.26** | 0.11**  | -0.22** | -0.24** | -0.02   | 0.09*   | 0.00     | -0.05   | -0.43** | -0.08*  | 0.16**    |        |
| LWid               | -0.23** | 0.04    | -0.27** | -0.08   | -0.03   | 0.18**  | 0.00     | -0.18** | -0.31** | 0.06    | 0.25**    | 0.77** |

Table S1 (cont'd)

|           | Temperature 20 °C |        |        |        |        |        |        |         |         |        |        |        |
|-----------|-------------------|--------|--------|--------|--------|--------|--------|---------|---------|--------|--------|--------|
| DTA       | -0.29**           |        |        |        |        |        |        |         |         |        |        |        |
| FIBud     | -0.08*            | 0.66** |        |        |        |        |        |         |         |        |        |        |
| FIBudLS   | 0.07              | -0.13* | 0.41** |        |        |        |        |         |         |        |        |        |
| FIBudPS   | -0.13**           | 0.64** | 0.83** | 0.53** |        |        |        |         |         |        |        |        |
| Branch    | 0.07*             | 0.21** | 0.36** | 0.03   | 0.26** |        |        |         |         |        |        |        |
| FIBranch  | 0.01              | 0.51** | 0.75** | 0.06   | 0.65** | 0.64** |        |         |         |        |        |        |
| FIDiam    | -0.07*            | 0.16** | 0.25** | 0.06   | 0.20** | 0.00   | 0.12** |         |         |        |        |        |
| Nodes     | 0.30**            | 0.24** | 0.10** | 0.13*  | -0.05  | 0.26** | 0.05   | 0.09*   |         |        |        |        |
| HghtFI    | -0.09*            | 0.28** | 0.23** | 0.23** | 0.27** | 0.35** | 0.18** | 0.10*   | 0.41**  |        |        |        |
| Internode | -0.27**           | 0.16** | 0.19** | 0.15** | 0.32** | 0.21** | 0.16** | 0.05    | -0.17** | 0.82** |        |        |
| LLeng     | -0.13**           | 0.08*  | -0.08* | -0.14* | 0.06   | 0.13** | 0.05   | -0.09*  | -0.30** | 0.03   | 0.21** |        |
| LWid      | -0.18**           | 0.16** | 0.01   | 0.02   | 0.18** | 0.19** | 0.10** | -0.14** | -0.23** | 0.19** | 0.33** | 0.74** |

<sup>z</sup> Trait abbreviations as defined in Table 1.

<sup>y</sup> \* and \*\* indicate significance at  $P < 0.05$  and  $0.001$ , respectively.

Figure S1. Weekly temperature (mean  $\pm$  standard deviation) data for all treatments.

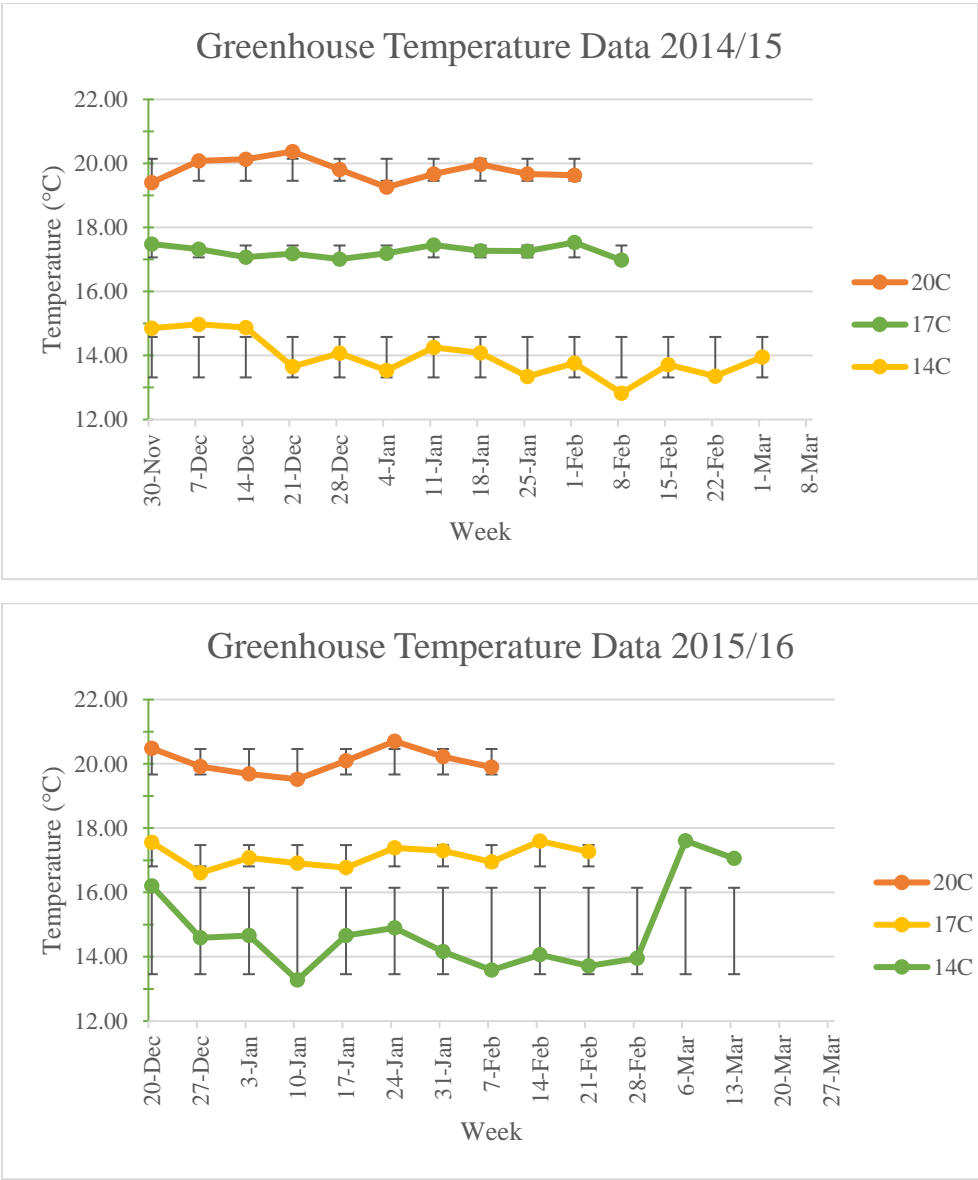

Figure S2. Frequency distribution for crop timing and quality traits for *P. axillaris* × *P. exserta* F<sub>7</sub> recombinant inbred line population at 14 °C evaluated in 2014 and 2015. Parental values for *P. axillaris* (AX) and *P. exserta* (EX) are indicated with arrows.

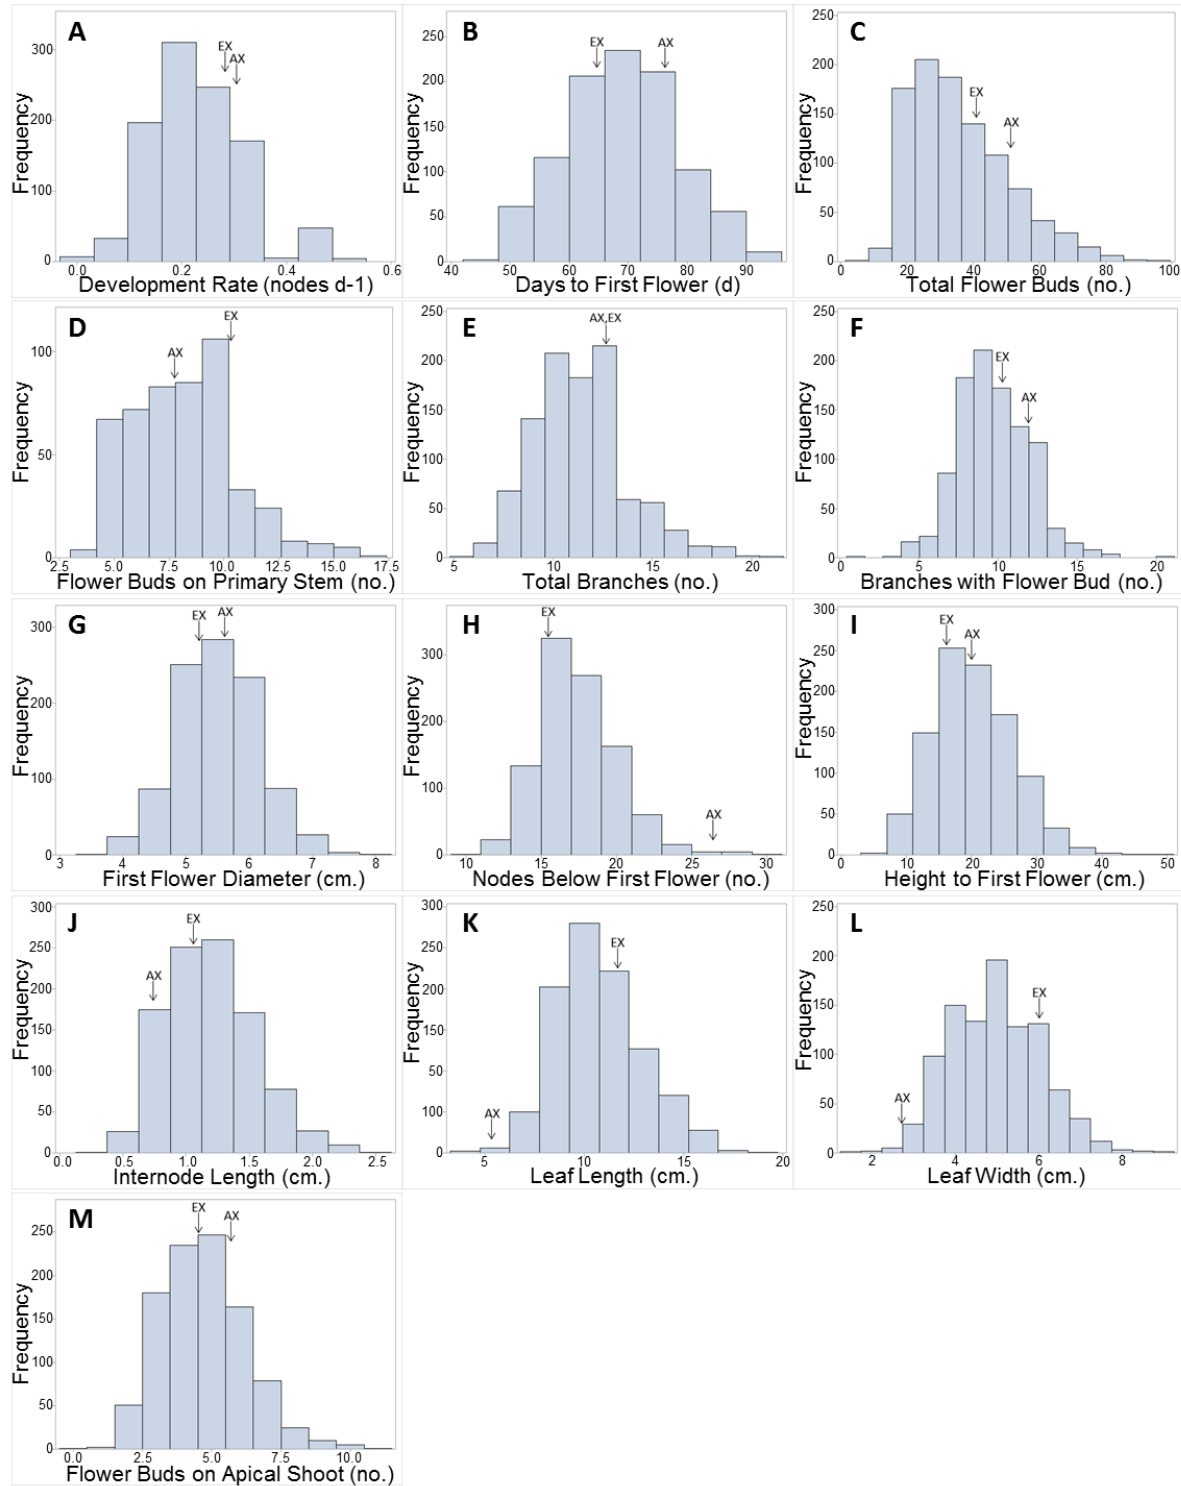

Figure S3. Frequency distribution for crop timing and quality traits for *P. axillaris* × *P. exserta* F<sub>7</sub> recombinant inbred line population at 17 °C evaluated in 2014 and 2015. Parental values for *P. axillaris* (AX) and *P. exserta* (EX) are indicated with arrows.

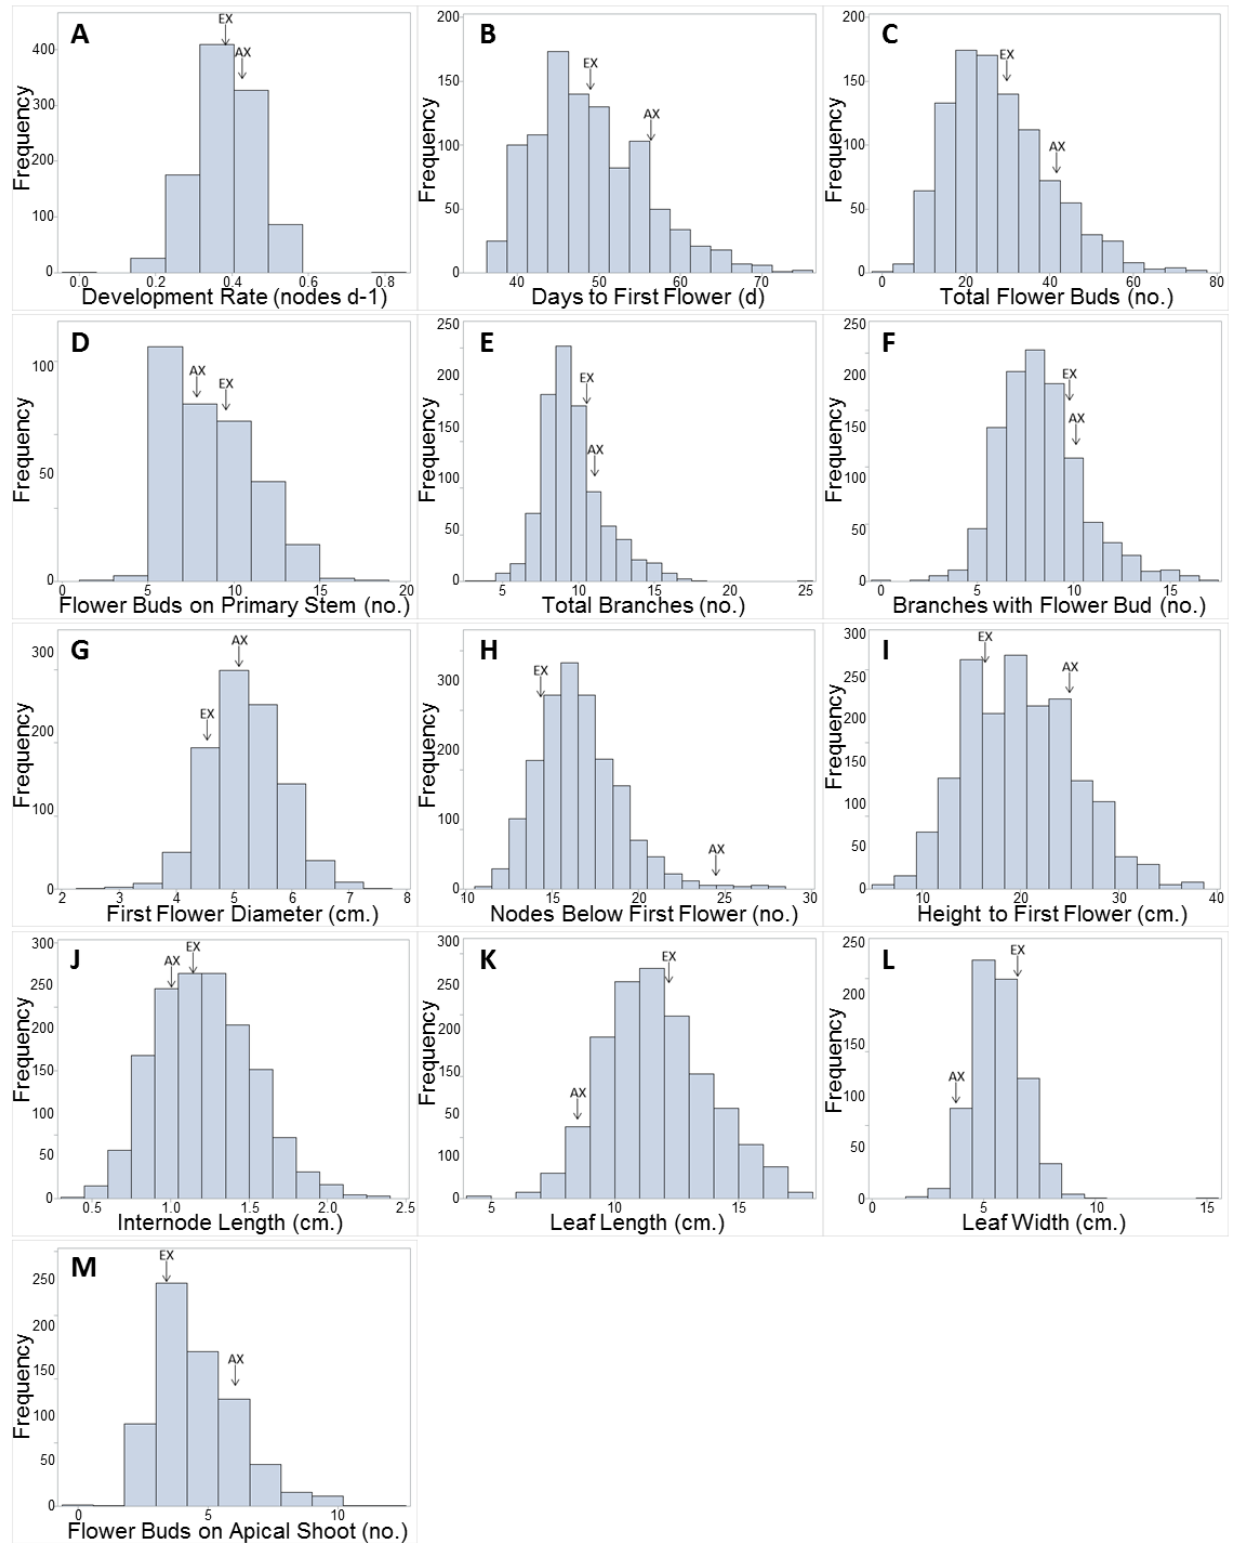

Figure S4. Frequency distribution for crop timing and quality traits for *P. axillaris* × *P. exserta* F<sub>7</sub> recombinant inbred line population at 20 °C evaluated in 2014 and 2015. Parental values for *P. axillaris* (AX) and *P. exserta* (EX) are indicated with arrows.

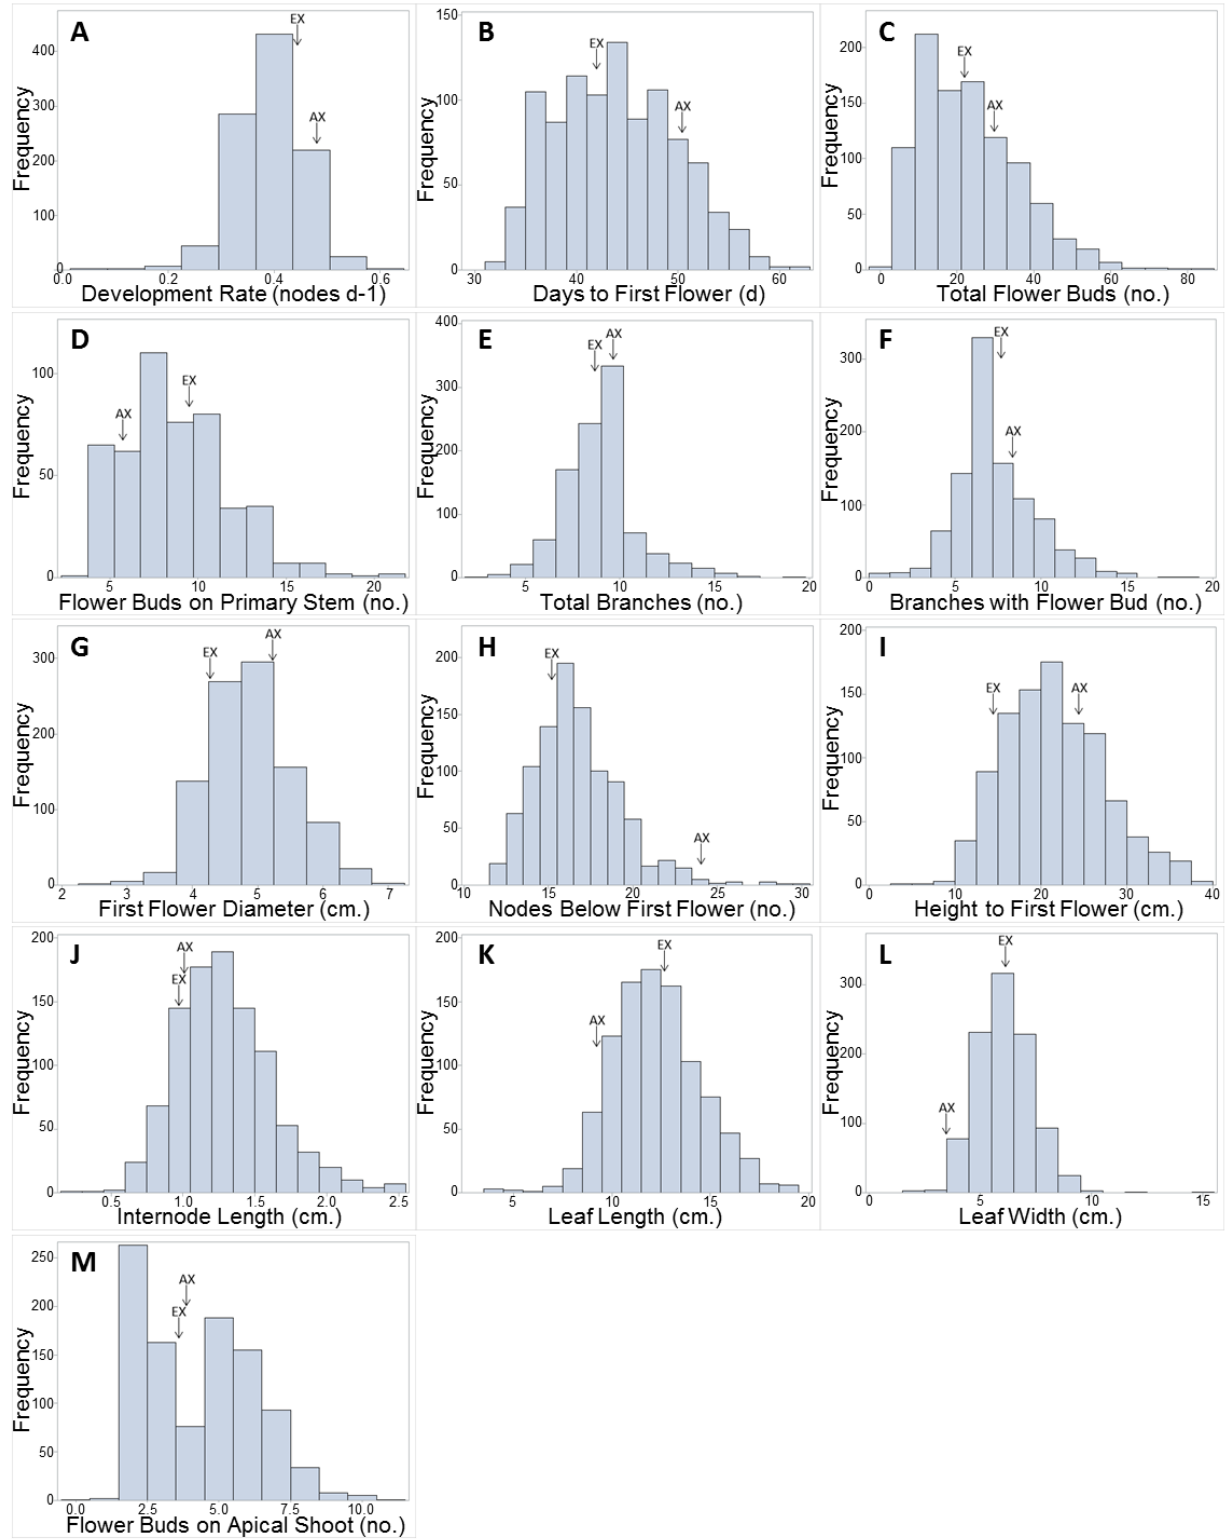

Fig. S5. Linkage map for the *P. axillaris* × *P. exserta* F<sub>7</sub> recombinant inbred line population

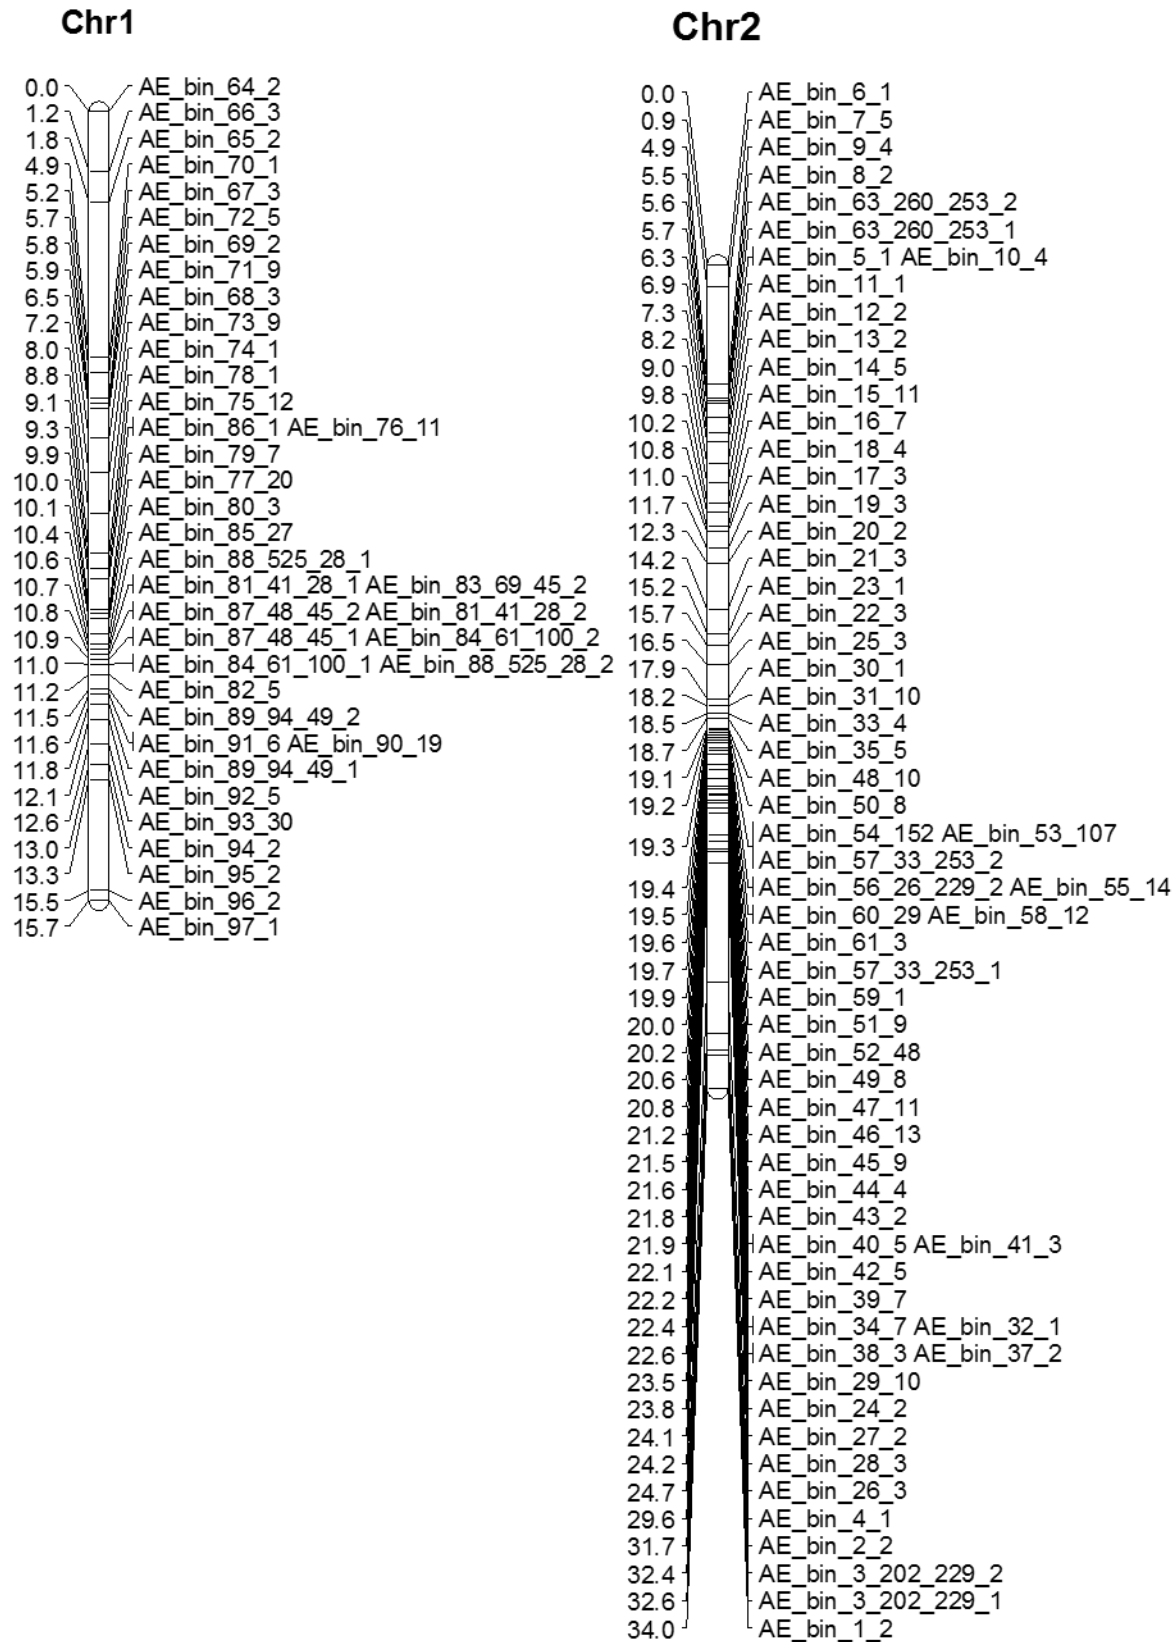



Fig. S5 (cont'd). Linkage map for the *P. axillaris* × *P. exserta* F<sub>7</sub> recombinant inbred line population

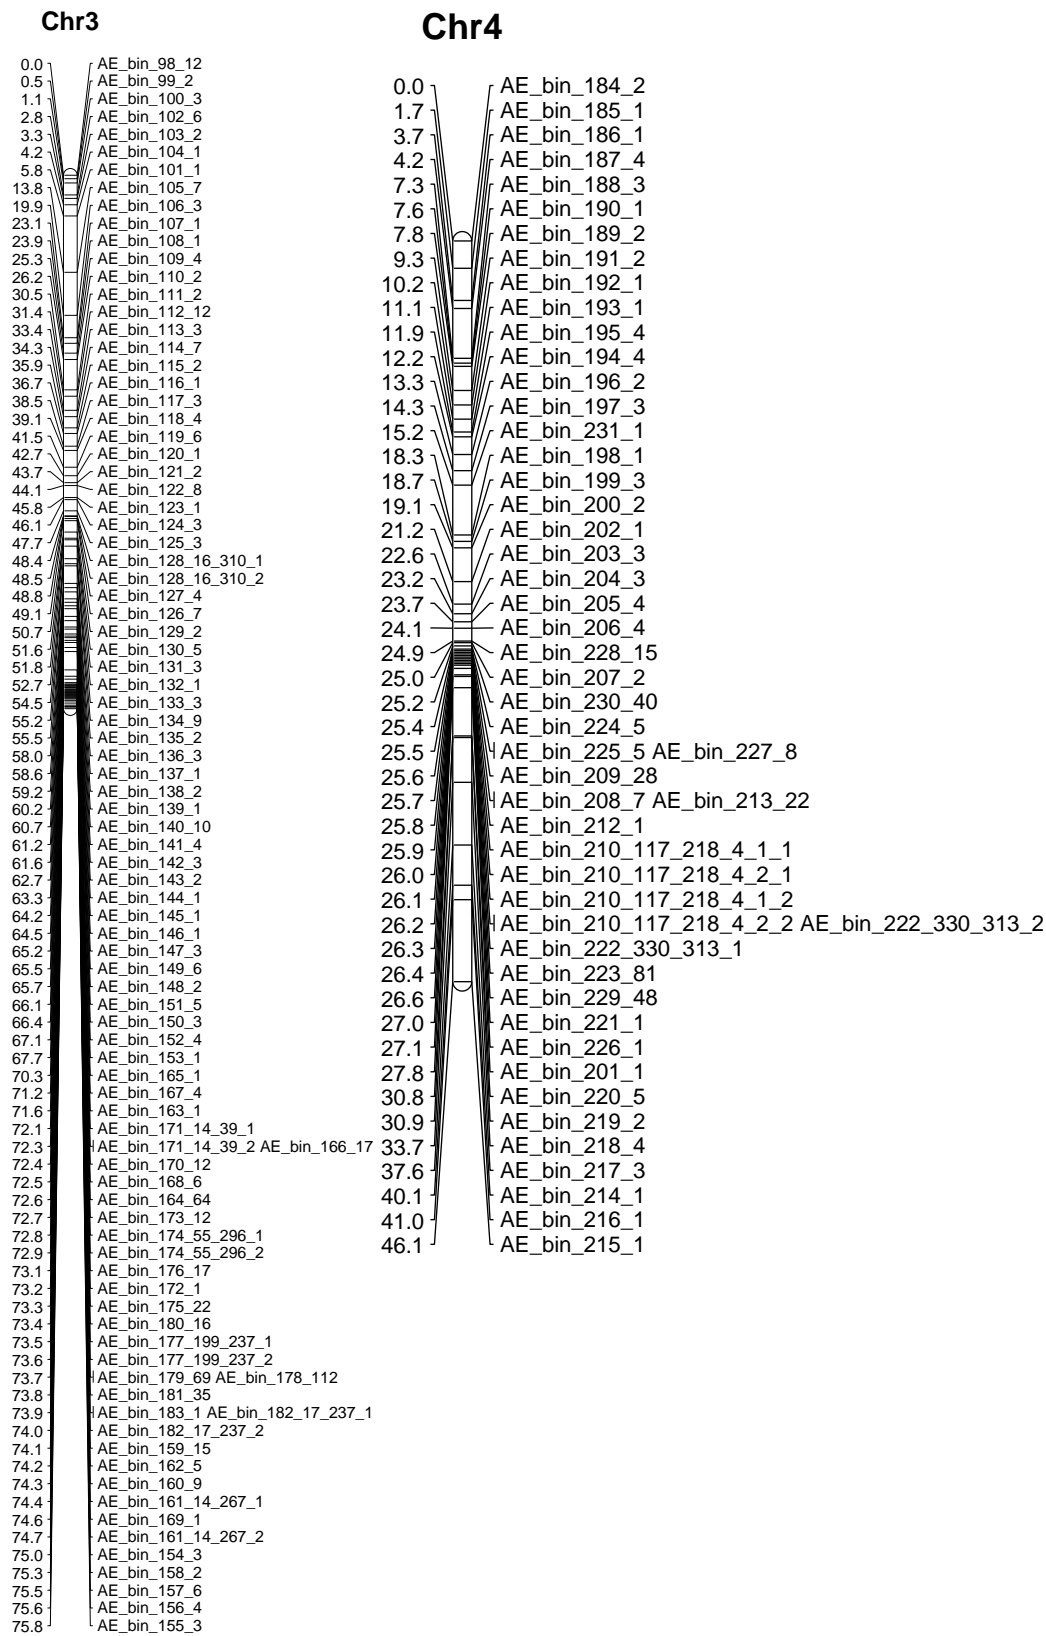

Fig. S5 (cont'd). Linkage map for the *P. axillaris* × *P. exserta* F<sub>7</sub> recombinant inbred line population

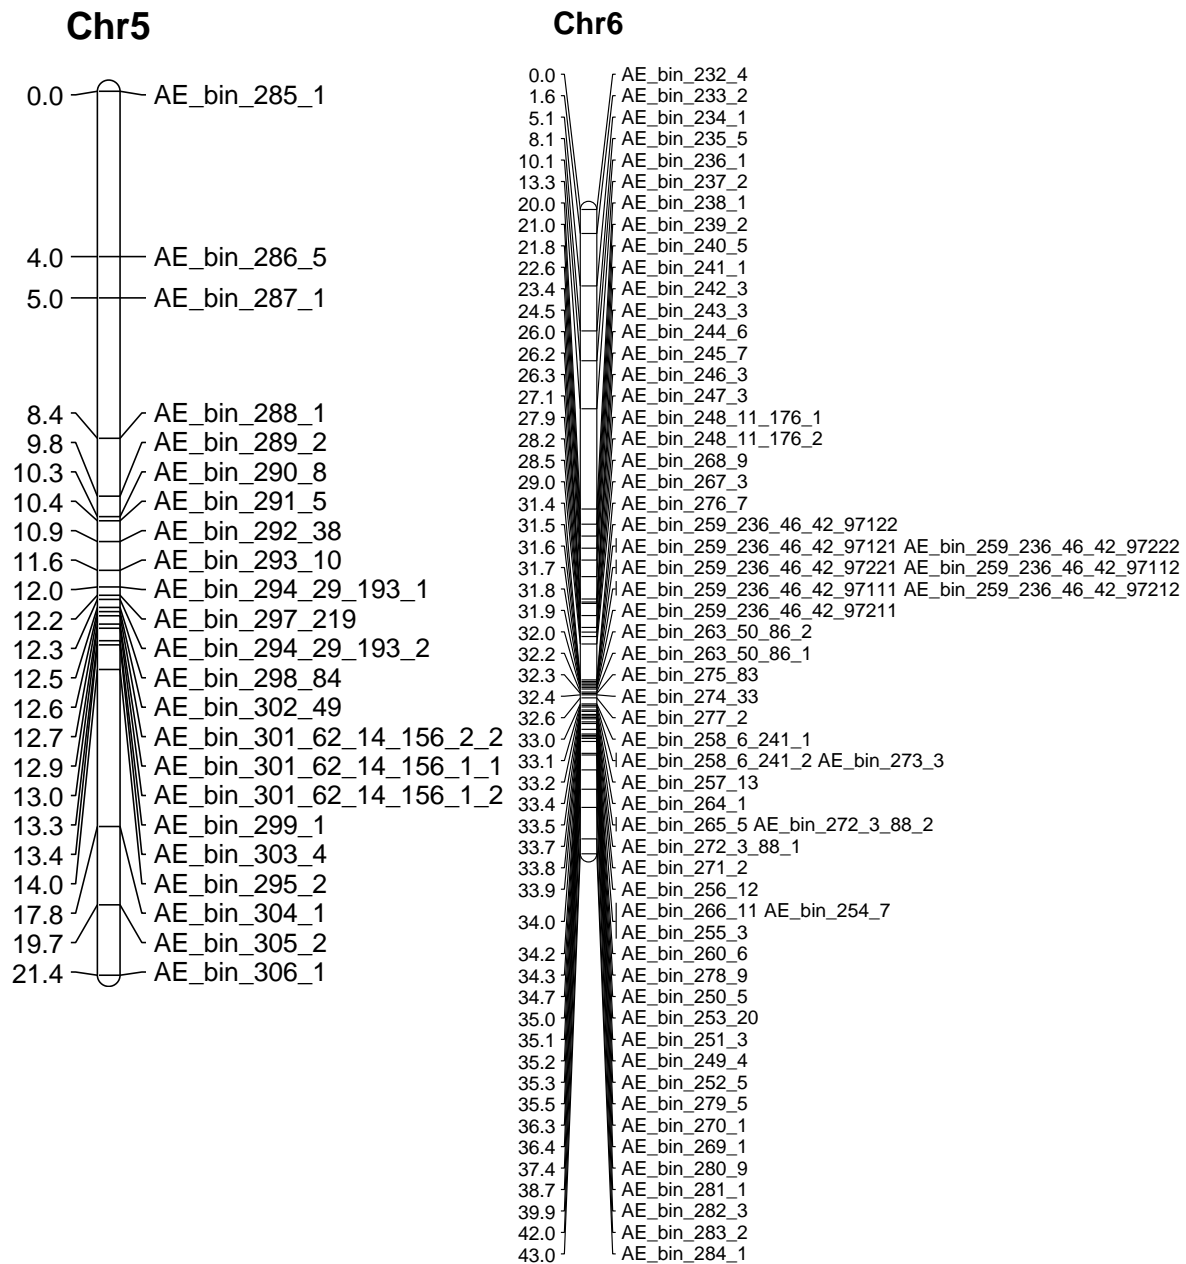

Fig. S5 (cont'd). Linkage map for the *P. axillaris* × *P. exserta* F<sub>7</sub> recombinant inbred line population

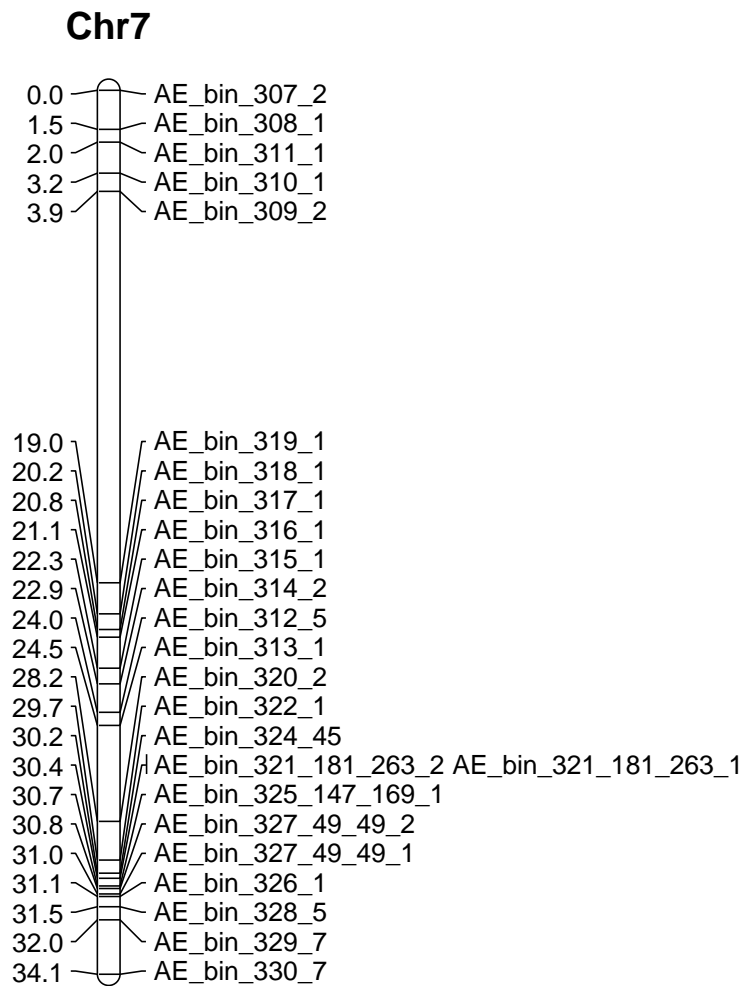

Supplement: Supplementary file 1 [file 1]
