# Supplementary material
Source: publisher figshare collection journal article supplement (https://gsajournals.figshare.com/articles/dataset/_/9696170)
Supplement: Supplementary file 1 [file 1]

## Sheet: Sheet1
	AE_12	AE_120	AE_326	AE_131	AE_171	AE_176	AE_218	AE_226	AE_241	AE_243	AE_294	AE_295	AE_328	AE_335	AE_4	AE_66	AE_5	AE_82	AE_95	AE_90	AE_86	AE_159	AE_18	AE_242	AE_252	AE_28	AE_313	AE_337	AE_46	AE_254	AE_293	AE_300	AE_310	AE_297	AE_304	AE_320	AE_36	AE_39	AE_42	AE_84	AE_164	AE_122	AE_123	AE_307	AE_195	AE_187	AE_324	AE_316	AE_60
bin1_2	1	1	3	1	1	1	1	1	0	1	0	1	3	1	1	0	0	1	1	2	0	0	1	1	1	1	1	1	0	1	0	2	2	2	2	2	2	0	2	2	2	2	2	2	2	2	2	2	2
bin2_2	1	1	1	1	1	1	1	1	1	1	1	1	1	1	1	1	1	1	1	1	1	1	1	1	1	1	1	1	1	1	1	1	2	2	2	2	2	2	2	2	2	2	2	2	2	2	2	2	2
bin3_202_229_1	1	1	1	1	1	1	1	1	1	1	1	1	1	1	1	1	1	1	1	1	1	1	1	1	1	1	1	1	1	1	1	1	2	2	2	2	2	2	2	2	2	2	2	2	2	2	2	2	2
bin3_202_229_2	1	1	1	1	1	1	1	1	1	1	1	1	1	1	1	1	1	1	1	1	1	1	1	1	1	1	1	1	1	1	1	1	2	2	2	2	2	2	2	2	2	2	2	2	2	2	2	2	2
bin4_1	1	1	1	3	3	0	0	1	0	3	0	3	1	1	3	0	3	3	1	1	0	2	1	3	0	1	3	1	0	1	0	1	2	0	0	0	0	0	2	0	0	2	0	2	2	0	0	2	2
bin5_1	1	1	1	1	1	1	0	1	1	1	0	1	1	1	1	0	0	1	1	1	1	0	2	1	2	2	2	2	0	1	0	0	0	1	1	1	0	0	1	1	1	1	0	1	1	1	0	1	1
bin6_1	1	1	2	1	1	0	1	0	1	1	0	1	1	1	0	1	0	1	1	0	1	0	2	2	0	2	2	2	0	0	0	0	0	0	1	1	0	0	0	1	1	1	0	1	1	1	0	1	1
bin7_5	1	1	1	1	1	0	1	1	1	1	0	1	1	1	0	1	0	1	1	0	0	2	2	2	2	2	2	2	2	1	0	0	1	1	1	1	1	0	1	1	1	1	1	1	1	1	0	1	1
bin8_2	1	0	1	1	1	0	1	0	0	1	0	1	1	1	0	0	0	1	1	0	0	0	0	2	2	2	2	2	0	2	2	0	0	0	1	1	1	0	0	1	1	1	0	0	0	1	0	1	1
bin9_4	1	1	1	1	1	1	0	1	1	1	0	1	1	1	1	0	1	1	1	1	1	2	2	1	2	2	2	2	2	2	0	2	2	1	1	1	1	0	1	1	1	1	1	1	1	1	1	1	1
bin10_4	1	1	1	1	1	1	0	1	1	1	0	1	1	1	1	0	0	1	1	1	1	0	2	1	2	2	2	2	0	1	0	0	0	1	1	1	0	0	1	1	1	1	0	1	1	1	0	1	1
bin11_1	1	1	1	1	1	1	1	1	0	1	0	1	1	1	1	0	0	1	1	1	1	2	1	1	1	2	2	2	2	1	0	0	1	1	1	1	1	0	1	1	1	1	1	1	1	1	1	1	1
bin12_2	1	1	1	1	1	1	1	1	1	1	1	1	1	1	1	1	1	1	1	1	1	2	1	1	1	2	2	2	2	1	2	2	1	1	1	1	1	1	1	1	1	1	1	1	1	1	1	1	1
bin13_2	1	1	1	1	1	1	1	1	1	1	0	1	1	1	1	1	1	1	1	1	1	2	1	1	1	2	2	2	2	1	2	2	1	1	1	1	1	1	1	1	1	1	1	1	1	1	1	1	1
bin14_5	1	1	1	1	1	0	1	1	3	1	0	1	1	1	1	1	0	1	1	1	1	2	1	2	1	2	2	2	2	1	0	0	0	1	1	1	1	0	1	1	1	1	0	1	1	1	1	1	1
bin15_11	1	1	1	1	1	1	1	1	1	1	1	1	1	1	1	1	1	1	1	1	1	2	1	2	1	2	2	1	2	1	2	0	1	1	1	1	1	1	1	1	1	1	1	1	1	1	1	1	1
bin16_7	1	1	1	1	1	1	1	1	1	1	0	1	1	1	1	1	1	1	1	1	1	2	1	2	1	2	2	1	2	1	2	2	1	1	1	1	1	1	1	1	1	2	2	1	1	1	1	1	1
bin17_3	1	1	1	1	1	1	1	1	0	1	0	1	1	1	1	0	0	1	1	1	1	2	1	2	1	2	2	1	2	1	0	2	1	1	1	1	1	0	1	1	1	2	0	2	1	1	1	1	1
bin18_4	1	1	1	1	1	1	1	1	1	1	0	1	1	1	1	1	1	1	1	1	1	2	1	2	1	2	2	1	2	1	2	2	1	1	1	1	1	1	1	1	1	2	2	2	2	2	1	1	1
bin19_3	1	2	1	1	1	1	0	1	1	1	0	1	1	1	1	1	1	1	1	1	0	2	1	2	1	2	2	1	2	1	0	2	1	1	1	1	1	0	1	1	1	2	2	2	2	2	1	1	1
bin20_2	1	2	1	1	1	1	1	1	1	1	1	1	1	1	1	1	1	1	1	1	1	2	1	2	1	2	2	1	1	1	2	0	1	1	1	1	1	1	1	1	1	2	2	2	2	2	1	1	1
bin21_3	1	2	1	1	1	1	1	1	1	1	0	1	1	1	1	1	1	1	1	1	1	2	1	1	1	1	2	1	1	1	0	0	1	1	1	1	1	0	1	1	1	2	0	2	2	2	2	1	1
bin22_3	1	2	1	1	1	1	1	1	1	1	0	1	1	1	1	1	1	1	1	1	1	2	1	1	1	1	2	1	1	1	2	0	1	1	1	1	1	1	1	1	1	2	2	2	2	2	2	1	1
bin23_1	1	2	1	1	1	0	1	1	1	1	0	1	1	1	1	1	1	1	1	1	1	2	1	1	1	1	2	1	1	1	2	0	0	1	1	1	1	0	1	1	1	2	2	2	2	2	2	2	1
bin24_2	1	2	1	1	1	1	1	1	1	1	1	1	1	1	1	1	1	1	1	1	1	2	1	1	1	1	2	1	1	1	0	1	1	1	1	1	1	0	1	1	1	2	2	2	2	2	2	2	1
bin25_3	1	2	1	1	2	1	1	1	1	1	2	1	1	1	1	1	1	1	1	1	1	2	1	1	1	1	2	1	1	1	2	2	1	1	1	1	1	1	1	1	1	2	2	2	2	2	2	2	2
bin26_3	1	2	1	1	2	1	1	1	1	1	2	1	1	1	1	1	1	1	1	1	1	2	1	1	1	1	2	1	1	1	2	2	1	1	1	1	1	2	2	1	1	2	2	2	2	2	2	2	2
bin27_2	1	2	1	1	2	1	1	0	0	1	0	1	1	1	0	1	0	1	1	0	1	2	1	1	1	1	2	1	1	0	0	0	0	1	1	1	1	0	2	1	1	2	2	2	2	2	2	2	2
bin28_3	1	2	1	1	2	1	0	1	1	1	0	1	1	1	1	1	0	1	1	0	1	1	1	1	1	1	2	1	1	1	0	0	0	1	1	1	1	0	2	1	1	2	2	2	2	2	2	2	2
bin29_10	1	2	1	1	2	1	1	1	1	1	1	1	1	1	1	1	1	1	1	1	1	1	1	1	1	1	2	1	1	1	2	1	1	1	1	1	1	2	2	1	1	2	2	2	2	2	2	2	2
bin30_1	0	1	1	1	2	1	0	1	1	1	0	0	1	1	1	1	0	1	0	0	1	1	0	1	1	1	2	1	1	1	2	0	1	1	1	1	1	0	1	1	1	2	0	2	2	2	2	2	2
bin31_10	1	1	1	1	2	1	1	1	1	1	1	1	1	1	1	1	1	1	1	1	1	1	1	1	1	1	2	1	1	1	2	1	1	1	1	1	1	2	1	1	1	2	2	2	2	2	2	2	2
bin32_1	1	1	1	1	2	1	1	1	1	1	1	1	1	1	1	1	1	1	1	1	1	1	1	1	1	1	1	1	1	1	2	1	1	1	1	1	1	2	1	1	1	2	2	2	2	2	2	2	2
bin33_4	1	1	1	1	2	1	1	1	1	1	0	1	1	1	1	1	0	1	1	1	1	1	1	1	1	1	1	1	1	1	2	1	1	1	1	1	1	2	1	1	1	2	2	2	2	2	2	2	2
bin34_7	1	1	1	1	2	1	1	1	1	1	1	1	1	1	1	1	1	1	1	1	2	1	1	1	1	1	1	1	1	1	2	1	1	1	1	1	1	2	1	1	1	2	2	2	2	2	2	2	2
bin35_5	1	1	1	1	2	1	1	1	1	1	1	1	1	1	1	1	1	1	1	1	2	1	1	1	1	1	1	1	1	1	2	1	1	1	1	1	1	2	1	1	1	2	2	2	2	1	2	2	2
bin36_8	1	1	1	1	2	1	1	1	1	1	1	1	1	1	1	1	1	1	1	1	2	1	1	1	1	1	1	1	1	1	2	1	1	1	1	1	1	2	1	1	1	2	2	2	2	2	2	2	2
bin37_2	0	0	1	1	1	0	0	1	0	1	0	0	0	1	0	0	0	1	1	1	2	1	1	0	1	1	1	1	1	1	0	0	1	1	0	1	0	0	1	1	1	2	0	2	2	2	0	2	2
bin38_3	1	1	1	1	1	1	0	1	0	2	0	1	1	1	1	1	0	1	1	1	2	1	1	1	1	1	1	1	1	1	2	0	0	1	1	1	1	0	1	1	1	2	0	2	2	2	2	2	2
bin39_7	1	1	1	1	1	1	1	1	1	1	1	1	1	1	1	1	1	1	1	1	2	1	1	1	1	1	1	1	1	1	2	1	1	1	1	1	1	2	1	1	1	2	2	2	2	2	2	2	2
bin40_5	1	1	1	1	1	1	1	1	1	1	1	1	1	1	1	1	1	1	1	0	2	1	1	1	1	1	1	1	1	1	0	1	1	1	1	1	1	2	1	1	1	2	2	2	2	2	2	2	2
bin41_3	1	1	1	1	1	1	1	1	1	1	0	1	1	1	1	1	0	1	1	1	2	1	1	1	1	1	1	1	1	1	0	0	1	1	1	1	0	0	1	1	1	2	2	2	2	2	0	2	2
bin42_5	1	1	1	1	1	1	1	1	1	1	1	1	1	1	1	1	1	1	1	1	2	1	1	1	1	1	1	1	1	1	2	1	1	1	1	1	1	2	1	1	1	2	2	2	2	2	2	2	2
bin43_2	1	1	1	1	1	0	1	1	1	1	0	1	1	1	1	1	0	1	1	0	2	0	1	1	1	1	1	1	1	1	0	0	1	1	1	1	1	0	1	1	1	2	0	2	2	2	2	2	2
bin44_4	1	1	1	1	1	1	1	1	1	1	1	1	1	1	1	1	1	1	1	1	2	1	1	1	1	1	1	1	1	1	1	1	1	1	1	1	1	2	1	1	1	2	2	2	2	2	2	2	2
bin45_9	1	1	1	1	1	1	1	1	1	1	1	1	1	1	1	1	1	1	1	1	2	1	1	1	1	1	1	1	1	1	1	1	1	1	1	1	1	2	1	1	1	2	2	2	2	2	2	2	2
bin46_13	1	1	1	1	1	1	1	1	1	1	1	1	1	1	1	1	1	1	1	1	2	1	1	1	1	1	1	1	1	1	1	1	1	1	1	1	1	2	1	1	1	2	2	2	2	2	2	2	2
bin47_11	1	1	1	1	1	1	1	1	1	1	1	1	1	1	1	1	1	1	1	1	1	1	1	1	1	1	1	1	1	1	1	1	1	1	1	1	1	2	1	1	1	2	2	2	2	2	2	2	2
bin48_10	1	1	1	1	1	1	1	1	1	1	1	1	1	1	1	1	1	1	1	1	1	1	1	1	1	1	1	1	1	1	1	1	1	1	1	1	1	2	1	1	1	2	2	2	2	2	2	2	2
bin49_8	1	1	1	1	1	1	1	1	1	1	0	1	1	1	1	1	1	1	1	1	1	1	1	1	1	1	1	1	1	1	0	0	1	1	1	1	1	2	1	1	1	2	2	2	2	2	2	2	2
bin50_8	1	1	1	1	1	1	1	1	1	1	1	1	1	1	1	1	1	1	1	1	1	1	1	1	1	1	1	1	1	1	1	1	1	1	1	1	1	2	1	1	1	2	2	2	1	1	2	2	2
bin51_9	1	1	1	1	1	1	1	1	1	1	1	1	1	1	1	1	1	1	1	1	1	1	1	1	1	1	1	1	1	1	1	1	1	1	1	1	1	2	1	1	1	2	2	2	1	1	2	2	2
bin52_48	1	1	1	1	1	1	1	1	1	1	1	1	1	1	1	1	1	1	1	1	1	1	1	1	1	1	1	1	1	1	1	1	1	1	1	1	1	2	1	1	1	2	2	2	1	1	2	2	2
bin53_107	1	1	1	1	1	1	1	1	1	1	1	1	1	1	1	1	1	1	1	1	1	1	1	1	1	1	1	1	1	1	1	1	1	1	1	1	1	2	1	1	1	2	2	2	1	1	2	2	2
bin54_152	1	1	1	1	1	1	1	1	1	1	1	1	1	1	1	1	1	1	1	1	1	1	1	1	1	1	1	1	1	1	1	1	1	1	1	1	1	2	1	1	1	2	2	2	1	1	2	2	2
bin55_14	1	1	1	1	1	1	1	1	1	1	1	1	1	1	1	1	1	1	1	1	1	1	1	1	1	1	1	1	1	1	1	1	1	1	1	1	1	2	1	1	1	2	2	2	1	1	2	2	2
bin56_26_229_1	1	1	1	1	1	1	1	1	1	1	1	1	1	1	1	1	1	1	1	1	1	1	1	1	1	1	1	1	1	1	1	1	1	1	1	1	1	2	1	1	1	2	2	2	1	1	2	2	2
bin56_26_229_2	1	1	1	1	1	1	1	1	1	1	1	1	1	1	1	1	1	1	1	1	1	1	1	1	1	1	1	1	1	1	1	1	1	1	1	1	1	2	1	1	1	2	2	2	1	1	2	2	2
bin57_33_253_1	1	1	1	1	1	1	1	1	1	1	1	1	1	1	1	1	1	1	1	1	1	1	1	1	1	1	1	1	1	1	1	1	1	1	1	1	1	2	1	1	1	2	2	2	1	1	2	2	2
bin57_33_253_2	1	1	1	1	1	1	1	1	1	1	1	1	1	1	1	1	1	1	1	1	1	1	1	1	1	1	1	1	1	1	1	1	1	1	1	1	1	2	1	1	1	2	2	2	1	1	2	2	2
bin58_12	1	1	1	1	1	1	1	1	1	1	1	1	1	1	1	1	1	1	1	1	1	1	1	1	1	1	1	1	1	1	1	1	1	1	1	1	1	2	1	1	1	2	2	2	1	1	2	2	2
bin59_1	1	1	1	1	1	1	0	1	1	1	0	1	1	1	0	1	1	1	1	1	1	0	1	1	1	1	1	1	1	1	1	1	1	1	1	1	0	2	1	1	1	0	0	0	1	1	0	0	0
bin60_29	1	1	1	1	1	1	1	1	1	1	1	1	1	1	1	1	1	1	1	1	1	1	1	1	1	1	1	1	1	1	1	1	1	1	1	1	1	2	1	1	1	2	2	2	1	1	2	2	2
bin61_3	1	1	1	1	1	1	0	1	1	1	0	1	1	1	0	1	0	1	0	0	0	1	1	1	1	1	1	1	1	1	0	0	1	1	1	1	1	0	1	1	1	2	0	2	1	1	2	2	2
bin62_124	1	1	1	1	1	1	1	1	1	1	1	1	1	1	1	1	1	1	1	1	1	1	1	1	1	1	1	1	1	1	1	1	1	1	1	1	1	2	1	1	1	2	2	2	1	1	2	2	2
bin63_260_253_1	2	2	2	2	2	2	2	2	2	2	2	2	2	2	2	2	2	2	2	2	2	2	2	2	2	2	2	2	2	2	2	2	1	1	1	1	1	2	1	1	1	2	2	2	1	1	2	2	2
bin63_260_253_2	2	2	2	2	2	2	2	2	2	2	2	2	2	2	2	2	2	2	2	2	2	2	2	2	2	2	2	2	2	2	2	2	1	1	1	1	1	2	1	1	1	2	2	2	1	1	2	2	2
bin64_2	2	1	1	1	1	3	2	2	1	2	0	2	2	2	2	1	0	2	2	1	1	1	2	2	2	1	1	2	2	2	0	0	1	2	1	1	2	1	1	1	2	1	1	2	1	1	2	3	2
bin65_2	2	1	1	1	1	0	0	0	1	2	0	0	0	2	0	1	0	2	0	0	1	1	2	2	2	1	1	2	2	2	0	0	1	0	1	1	0	0	0	1	0	1	0	2	1	1	0	1	0
bin66_3	2	1	1	2	1	3	2	2	1	2	0	2	2	2	2	1	2	2	2	1	1	0	2	2	2	1	1	2	2	2	1	0	1	2	1	1	2	0	1	1	2	1	1	2	1	1	2	1	2
bin67_3	2	1	1	2	1	3	0	2	1	2	0	2	2	2	0	1	0	2	2	1	1	1	2	2	2	3	1	2	2	2	0	0	1	2	2	1	0	1	1	1	2	1	0	2	1	1	2	1	2
bin68_3	2	1	1	2	1	3	2	2	1	2	2	2	2	2	2	1	2	2	2	1	1	1	2	2	2	3	1	2	2	2	1	2	1	2	2	1	2	1	1	1	2	1	1	2	1	1	2	1	2
bin69_2	2	1	1	2	1	0	2	2	1	2	0	2	2	2	2	1	2	2	2	1	1	1	2	2	2	3	1	2	2	2	1	0	1	2	2	1	2	0	1	1	2	1	0	2	1	1	2	1	2
bin70_1	2	1	1	2	1	3	2	2	0	2	0	2	2	2	0	0	0	2	2	0	1	0	2	2	2	3	1	2	2	0	0	0	1	2	2	1	2	0	1	1	2	1	0	2	1	1	0	1	2
bin71_9	2	1	1	2	1	1	2	2	1	2	2	2	2	2	2	1	2	2	2	1	1	1	2	2	2	1	1	2	2	2	1	2	1	2	2	1	2	1	1	1	2	1	1	2	1	1	2	1	2
bin72_5	2	1	1	2	1	3	2	2	1	2	2	2	1	2	2	1	2	2	2	1	1	1	2	2	2	3	1	2	2	2	1	2	1	2	2	1	2	1	1	1	2	1	1	2	1	1	2	1	2
bin73_9	2	1	1	2	1	1	2	2	1	2	0	2	1	2	2	1	2	2	2	1	1	1	2	2	2	3	1	2	2	2	0	2	1	2	2	1	2	1	1	1	2	1	0	2	1	1	2	1	2
bin74_1	2	1	1	2	1	1	0	2	0	2	0	2	1	2	2	0	0	2	2	0	1	0	2	0	2	3	1	2	2	2	0	0	0	2	2	1	2	0	1	1	2	1	0	2	1	1	0	1	2
bin75_12	2	1	1	2	1	1	2	2	1	2	2	2	1	2	2	1	2	2	2	1	1	1	2	2	2	3	1	2	2	2	0	2	1	2	2	1	2	0	1	1	2	1	1	2	1	1	2	1	2
bin76_11	2	1	1	2	1	1	2	2	1	2	2	2	1	2	2	1	2	2	2	1	1	1	2	2	2	3	1	2	2	2	1	2	1	2	2	1	2	1	1	1	2	1	1	2	1	1	2	2	2
bin77_20	2	1	1	2	1	1	2	2	1	2	2	2	1	2	2	1	2	2	2	1	1	1	2	2	2	3	2	2	2	2	1	2	1	2	2	1	2	1	1	1	2	1	1	2	1	1	2	2	2
bin78_1	0	1	1	2	1	1	2	2	1	1	2	2	1	2	2	1	2	2	2	1	1	1	2	2	0	3	2	0	2	2	1	0	1	2	2	1	2	1	1	1	0	1	1	2	1	1	2	2	0
bin79_7	2	1	1	2	1	1	2	2	1	2	0	2	1	2	2	1	2	2	2	1	1	1	2	2	2	3	2	2	2	2	1	2	1	2	2	1	2	0	1	1	2	1	1	2	1	1	2	2	2
bin80_3	2	1	1	2	1	1	0	2	1	2	0	2	1	2	2	1	0	2	2	1	1	1	2	2	2	3	2	2	2	2	1	2	1	2	2	1	0	1	1	1	2	1	1	2	1	1	0	2	2
bin81_41_28_1	2	1	1	2	1	1	2	2	1	2	2	2	1	2	2	1	2	2	2	1	1	1	2	2	2	1	2	2	2	2	1	2	1	2	2	1	2	1	1	1	2	1	1	2	1	1	2	2	2
bin81_41_28_2	2	1	1	2	1	1	2	2	1	2	2	2	1	2	2	1	2	2	2	1	1	1	2	2	2	2	2	2	2	2	1	2	1	2	2	1	2	1	1	1	2	1	1	2	1	1	2	2	2
bin82_5	2	1	1	2	1	1	2	2	1	2	2	2	1	2	2	1	2	2	2	1	1	1	2	2	1	2	2	2	2	2	0	2	1	2	2	1	2	0	1	1	2	1	1	2	1	1	2	2	2
bin83_69_45_1	2	1	1	2	1	1	2	2	1	2	2	2	1	2	2	1	2	2	2	1	1	1	2	2	2	2	2	2	2	2	1	2	1	2	2	1	2	1	1	1	2	1	1	2	1	1	2	2	2
bin83_69_45_2	2	1	1	2	1	1	2	2	1	2	2	2	1	2	2	1	2	2	2	1	1	1	2	2	2	2	2	2	2	2	1	2	1	2	2	1	2	1	1	1	2	1	1	2	1	1	2	2	2
bin84_61_100_1	2	1	1	2	1	1	2	2	1	2	2	2	1	2	2	1	2	2	2	1	1	1	2	2	2	2	2	2	2	2	1	2	1	2	2	1	2	1	1	1	2	1	1	2	1	1	2	2	2
bin84_61_100_2	2	1	1	2	1	1	2	2	1	2	2	2	1	2	2	1	2	2	2	1	1	1	2	2	2	2	2	2	2	2	1	2	1	2	2	1	2	1	1	1	2	1	1	2	1	1	2	2	2
bin85_27	2	1	1	2	1	1	2	2	1	2	2	2	1	2	2	1	2	2	2	1	1	1	2	2	2	3	2	2	2	2	1	2	1	2	2	1	2	1	1	1	2	1	1	2	1	1	2	2	2
bin86_1	2	1	1	2	1	0	0	2	0	2	0	2	1	2	2	0	2	2	2	0	1	0	2	2	2	3	2	2	2	2	0	0	0	2	2	1	0	0	1	1	2	1	1	2	1	1	2	2	2
bin87_48_45_1	2	1	1	2	1	1	2	2	1	2	2	2	1	2	2	1	2	2	2	1	1	1	2	2	2	2	2	2	2	2	1	2	1	2	2	1	2	1	1	1	2	1	1	2	1	1	2	2	2
bin87_48_45_2	2	1	1	2	1	1	2	2	1	2	2	2	1	2	2	1	2	2	2	1	1	1	2	2	2	2	2	2	2	2	1	2	1	2	2	1	2	1	1	1	2	1	1	2	1	1	2	2	2
bin88_525_28_1	2	1	1	2	1	1	2	2	1	2	2	2	1	2	2	1	2	2	2	1	1	1	2	2	2	1	2	2	2	2	1	2	1	2	2	1	2	1	1	1	2	1	1	2	1	1	2	2	2
bin88_525_28_2	2	1	1	2	1	1	2	2	1	2	2	2	1	2	2	1	2	2	2	1	1	1	2	2	2	2	2	2	2	2	1	2	1	2	2	1	2	1	1	1	2	1	1	2	1	1	2	2	2
bin89_94_49_1	2	1	1	2	1	1	2	2	1	2	2	2	1	2	2	1	2	2	2	1	1	1	2	2	1	1	2	2	2	2	1	2	1	2	2	1	2	1	1	1	2	1	1	2	1	1	2	2	2
bin89_94_49_2	2	1	1	2	1	1	2	2	1	2	2	2	1	2	2	1	2	2	2	1	1	1	2	2	1	1	2	2	2	2	1	2	1	2	2	1	2	1	1	1	2	1	1	2	1	1	2	2	2
bin90_19	2	1	1	2	1	1	2	2	1	2	2	2	1	2	2	1	2	2	2	1	1	1	2	2	1	1	2	2	2	2	1	2	1	2	2	1	2	1	1	1	2	1	1	2	1	1	2	2	2
bin91_6	2	1	1	2	1	1	0	2	1	2	0	2	1	2	2	1	0	2	2	0	1	1	2	2	1	3	2	2	2	2	0	2	1	2	2	1	0	0	1	1	2	1	1	2	1	1	2	2	2
bin92_5	2	1	1	2	1	1	2	2	1	2	0	2	1	2	2	1	0	2	2	1	1	1	2	2	1	3	2	2	2	2	1	0	0	2	2	1	2	0	1	1	2	1	0	2	1	1	2	2	2
bin93_30	2	1	1	2	1	1	2	2	1	2	2	2	1	2	2	1	2	2	2	1	1	1	2	2	1	3	2	2	2	2	1	2	1	2	2	1	2	1	1	1	2	1	1	2	1	1	2	2	2
bin94_2	2	1	1	2	2	1	2	2	1	2	0	2	1	2	2	1	2	2	2	1	0	1	2	2	1	3	2	2	2	2	0	2	1	2	2	1	2	1	1	1	2	1	0	2	1	1	2	2	2
bin95_2	2	1	1	2	2	1	0	2	0	2	0	2	1	2	2	1	0	2	2	0	1	0	2	2	1	3	2	2	2	2	0	0	0	2	2	1	2	0	1	1	2	1	1	2	1	1	2	2	2
bin96_2	2	1	1	2	2	0	0	2	1	2	0	0	1	2	0	0	0	2	2	0	0	0	2	2	1	3	2	2	0	2	0	0	0	2	2	1	0	0	1	1	2	1	0	2	0	1	0	2	2
bin97_1	2	0	1	2	1	0	2	0	1	2	0	2	0	2	0	1	0	2	2	0	0	0	2	2	1	3	2	2	2	2	0	0	0	2	2	1	2	0	0	1	2	1	1	2	1	1	2	2	2
bin98_12	1	2	2	1	1	2	2	2	2	1	1	1	2	3	1	2	1	1	2	1	2	2	1	2	1	2	1	2	2	2	2	2	2	1	1	2	2	1	1	2	1	2	2	2	1	1	1	1	1
bin99_2	1	2	2	1	1	2	2	2	2	1	0	1	2	3	1	2	1	1	2	1	2	3	1	2	1	2	1	2	2	2	0	2	2	1	1	2	2	0	1	2	1	2	2	2	1	1	1	1	1
bin100_3	1	0	2	1	1	0	2	2	2	1	0	0	2	3	0	2	0	1	0	0	2	2	1	2	0	2	1	1	0	0	0	0	0	1	1	2	2	0	0	2	1	2	0	2	1	1	0	1	1
bin101_1	0	2	2	2	1	2	2	2	2	1	0	0	2	2	0	2	0	1	2	0	2	2	0	2	1	2	0	1	2	2	2	2	2	0	0	2	2	0	1	2	1	2	2	2	0	0	0	0	1
bin102_6	1	2	2	2	1	2	2	2	2	1	1	1	2	3	1	2	1	1	2	1	2	2	1	2	1	2	1	1	2	2	2	2	2	1	1	2	2	1	1	2	1	2	2	2	1	1	1	1	1
bin103_2	1	2	2	2	1	0	2	2	2	1	0	1	2	3	1	2	1	1	2	1	2	2	1	2	1	2	1	1	2	2	0	2	2	1	1	2	2	0	1	2	1	2	2	2	1	1	0	1	2
bin104_1	1	2	2	2	1	2	2	2	2	1	1	1	2	3	1	2	1	1	2	1	2	2	1	2	1	2	1	1	2	2	2	2	3	1	1	2	2	0	1	2	1	2	2	2	1	1	1	1	2
bin105_7	1	2	2	2	1	2	1	2	2	1	1	1	2	1	1	2	1	1	1	1	1	1	2	1	2	2	1	1	2	1	2	2	2	1	1	2	2	0	1	2	1	1	1	2	1	1	1	1	2
bin106_3	1	1	1	2	1	2	0	2	1	1	1	1	2	1	1	0	1	1	1	1	1	1	1	1	1	1	1	1	2	1	0	0	2	0	2	2	2	2	1	1	1	1	1	2	1	1	0	1	2
bin107_1	2	1	1	2	1	2	1	2	1	1	1	1	2	1	1	2	1	1	1	1	1	1	1	1	1	1	1	1	2	1	0	2	2	1	1	2	2	0	1	1	1	1	1	2	1	1	1	1	2
bin108_1	2	1	1	2	1	0	1	2	1	1	0	1	2	1	0	2	0	1	1	0	1	1	0	1	1	1	1	1	0	0	0	0	0	0	1	2	0	0	1	1	1	1	0	1	1	1	0	1	2
bin109_4	2	1	1	2	1	2	1	2	1	1	2	1	2	1	1	2	1	1	1	1	1	1	1	1	1	1	1	1	2	1	2	2	2	1	2	2	2	2	1	1	1	1	1	1	1	1	1	1	2
bin110_2	2	1	1	2	1	2	1	2	1	1	2	1	2	1	1	2	0	2	1	0	1	1	1	1	2	1	1	1	2	1	0	2	2	1	2	2	2	2	1	1	1	1	1	1	1	1	1	1	2
bin111_2	2	1	1	2	1	2	1	2	2	1	2	1	2	1	1	1	1	2	2	1	1	1	1	1	2	1	1	1	2	1	2	2	2	1	2	2	2	2	1	1	1	1	1	1	1	1	3	1	2
bin112_12	2	1	1	2	1	2	1	2	2	1	2	1	2	1	1	1	1	2	2	1	1	1	1	1	2	1	1	1	2	1	2	2	2	1	2	2	2	2	1	1	1	1	1	1	1	1	1	1	2
bin113_3	2	1	1	2	1	2	1	2	2	1	2	1	2	1	1	1	1	2	2	1	1	1	1	1	2	1	1	1	2	1	2	2	2	1	2	2	2	2	1	1	1	1	1	1	1	1	1	1	2
bin114_7	2	1	1	2	1	2	1	2	2	1	2	1	2	1	1	1	1	2	2	1	1	1	1	1	2	1	1	1	2	1	2	2	2	1	2	2	2	2	1	1	1	1	1	1	1	1	1	1	2
bin115_2	2	1	1	0	1	0	1	0	2	1	0	1	0	1	0	1	0	2	2	0	1	1	1	1	0	1	1	1	2	1	2	0	0	1	2	2	0	2	1	1	1	1	0	1	1	1	1	1	2
bin116_1	2	1	1	2	1	2	1	2	2	1	2	1	3	1	1	1	1	2	2	1	1	1	1	1	2	1	1	1	2	1	2	2	2	1	2	2	2	2	1	1	1	1	0	1	1	1	0	1	2
bin117_3	2	1	1	2	1	2	1	2	2	1	1	1	3	1	1	1	1	2	2	1	1	1	2	1	2	1	1	1	2	1	2	2	2	1	2	2	2	2	1	1	1	1	1	1	1	1	0	1	2
bin118_4	2	1	1	2	1	0	0	2	0	1	0	1	3	1	1	1	0	2	2	0	1	1	0	1	2	1	1	1	2	1	0	0	0	1	2	0	0	0	1	1	1	1	0	1	0	1	0	1	2
bin119_6	2	1	1	2	1	2	1	2	2	1	1	1	3	1	1	1	1	2	2	1	1	1	2	1	2	1	2	1	2	1	2	2	2	1	2	2	2	2	1	1	1	1	1	1	1	1	2	1	2
bin120_1	2	1	1	2	1	2	1	2	2	1	0	1	3	1	1	1	1	2	2	1	1	0	2	2	2	1	2	1	2	1	2	2	2	1	2	2	2	2	1	1	1	1	0	1	1	1	0	1	2
bin121_2	2	1	1	2	1	2	1	2	2	1	0	1	3	1	0	1	1	2	2	1	1	1	2	2	2	1	2	1	2	1	0	2	0	1	2	2	2	0	1	1	1	1	0	1	1	1	2	1	2
bin122_8	2	1	1	2	1	2	1	2	2	1	1	1	1	1	1	1	1	2	2	1	1	1	2	2	2	1	2	1	2	1	2	0	2	1	2	2	2	2	1	1	1	1	0	1	1	1	2	1	2
bin123_1	2	1	1	2	1	2	0	2	2	1	1	0	0	1	1	1	1	2	2	1	0	1	2	2	2	1	2	1	2	1	2	2	2	1	0	2	0	2	1	1	1	3	1	1	0	1	2	1	2
bin124_3	2	1	1	2	1	2	1	2	2	1	0	1	3	1	0	1	0	2	2	1	1	1	2	2	2	1	2	1	2	1	0	0	0	1	2	2	2	0	1	1	1	1	0	1	1	1	2	1	2
bin125_3	2	1	1	2	1	2	0	2	2	0	0	1	2	1	1	1	0	2	2	0	0	1	2	2	2	1	2	0	2	1	2	2	0	2	2	2	2	2	1	1	1	1	1	1	1	1	2	1	2
bin126_7	2	1	1	2	1	2	1	2	2	1	0	1	1	2	1	1	1	2	1	1	1	1	2	2	2	1	2	2	2	1	2	0	2	2	2	2	2	2	1	1	1	1	2	1	1	1	0	1	2
bin127_4	2	1	1	2	1	2	1	2	2	1	1	1	0	2	1	1	0	2	1	1	1	1	2	2	2	1	2	2	2	1	2	2	2	2	2	2	2	2	1	1	1	1	2	1	1	1	2	1	2
bin128_16_310_1	2	1	1	2	1	2	1	2	2	1	1	1	2	2	1	1	1	2	1	1	1	1	2	2	2	1	2	2	2	1	2	2	1	2	2	2	2	2	1	1	1	1	2	1	1	1	2	1	2
bin128_16_310_2	2	1	1	2	1	2	1	2	2	1	1	1	2	2	1	1	1	2	1	1	1	1	2	2	2	1	2	2	2	1	2	2	2	2	2	2	2	2	1	1	1	1	2	1	1	1	2	1	2
bin129_2	2	1	1	2	1	0	1	2	2	1	0	1	2	2	1	1	0	2	1	2	0	1	2	2	2	1	1	2	2	1	0	0	2	2	2	2	2	0	1	1	1	1	0	1	1	1	2	1	2
bin130_5	2	1	1	2	1	2	1	2	2	1	1	1	0	2	1	1	1	2	1	2	1	1	2	2	2	1	1	2	2	1	2	2	0	2	2	2	2	0	1	1	1	1	2	1	1	1	2	1	2
bin131_3	2	1	1	2	1	0	1	2	2	1	0	1	0	2	0	1	0	2	1	0	1	1	2	2	2	1	1	2	2	1	0	0	0	2	2	2	2	0	1	1	1	1	0	1	1	1	2	1	2
bin132_1	2	1	1	2	1	0	0	2	0	1	0	0	3	2	0	0	0	2	1	0	0	0	1	2	2	1	1	2	2	0	0	0	0	2	2	2	0	0	1	1	1	1	0	1	0	1	0	1	2
bin133_3	2	1	1	2	1	2	1	2	2	1	1	1	3	2	1	1	1	2	1	2	1	1	1	2	2	1	1	2	2	2	2	2	2	2	2	2	2	2	1	1	1	1	2	1	1	1	2	1	2
bin134_9	2	1	1	2	1	2	1	2	2	1	1	1	3	2	1	1	1	2	1	2	1	1	1	2	2	1	1	2	2	2	2	2	2	2	2	2	2	2	1	1	1	1	2	1	1	2	2	1	2
bin135_2	2	1	1	2	1	2	1	2	2	1	0	1	3	2	0	1	1	2	1	2	1	1	1	2	2	1	1	2	2	2	0	0	0	2	2	2	2	0	1	1	1	1	2	1	1	2	2	1	2
bin136_3	1	1	1	2	1	2	1	2	2	1	1	1	3	2	1	1	1	2	1	2	1	1	1	2	2	1	1	2	2	2	2	2	2	2	2	2	2	2	1	1	1	1	2	1	1	2	2	1	2
bin137_1	1	1	1	2	1	2	0	2	2	1	0	1	3	2	1	1	0	2	1	0	1	1	1	2	2	1	1	2	2	2	0	0	2	2	2	2	1	0	1	1	1	1	2	1	1	2	2	1	2
bin138_2	0	0	1	2	1	2	0	2	2	1	0	1	3	2	0	1	0	2	1	0	1	0	1	2	2	1	1	2	2	2	0	0	0	2	2	2	0	0	1	1	1	1	0	1	1	2	2	1	2
bin139_1	1	1	1	2	1	2	0	2	2	1	0	1	3	2	1	1	0	2	1	2	1	1	1	2	2	1	1	2	2	2	0	2	0	2	2	2	1	0	1	1	1	1	2	1	1	2	2	1	2
bin140_10	1	1	1	2	1	2	1	2	2	1	2	1	3	2	1	1	1	2	1	2	1	1	1	2	2	1	1	2	2	2	2	2	2	2	2	2	1	2	1	1	1	1	2	1	1	2	2	1	2
bin141_4	1	1	1	2	1	2	1	2	2	1	0	1	3	2	1	1	1	2	1	2	1	1	1	2	2	1	1	2	2	2	2	0	2	2	2	2	1	2	1	1	1	1	2	1	1	2	2	1	2
bin142_3	1	1	1	2	1	2	1	2	2	1	2	1	3	2	1	1	1	2	1	2	1	1	1	2	2	1	1	2	2	2	2	2	2	2	2	2	1	2	1	1	1	1	2	1	1	2	2	1	2
bin143_2	1	0	1	2	1	2	0	2	2	1	2	0	2	2	0	1	0	2	1	2	0	0	0	2	2	1	1	2	2	2	2	2	2	2	2	2	1	2	1	1	1	1	2	1	1	2	2	1	2
bin144_1	1	0	1	0	1	0	0	2	2	1	0	1	3	2	0	1	0	2	1	2	1	0	1	2	2	1	1	2	0	0	0	0	0	2	2	2	1	0	1	1	1	1	0	1	1	2	0	1	2
bin145_1	1	1	1	2	1	0	1	2	2	1	0	1	3	2	0	1	0	2	1	2	1	1	1	2	2	1	1	2	2	2	2	2	2	2	2	2	1	0	1	1	1	2	2	1	1	2	2	1	2
bin146_1	1	1	1	2	1	2	0	2	2	1	0	1	3	2	1	1	1	2	1	2	1	0	1	2	2	1	1	2	2	2	2	2	0	2	2	2	1	0	1	1	1	2	2	1	1	2	2	1	2
bin147_3	1	1	1	2	1	2	1	2	2	1	2	1	3	2	1	1	1	2	1	2	1	1	1	2	2	1	1	2	2	2	2	2	2	2	2	2	1	0	1	1	1	2	2	1	1	2	2	1	2
bin148_2	1	1	1	2	1	0	0	2	2	1	0	0	0	2	2	1	0	2	1	0	1	0	1	2	2	1	1	2	2	2	0	0	0	2	2	2	1	0	1	1	1	2	2	1	1	2	2	1	2
bin149_6	1	1	1	2	1	2	1	2	2	1	2	1	3	2	2	1	2	2	1	2	1	1	1	2	2	1	1	2	2	2	2	2	2	2	2	2	1	2	1	1	1	2	2	1	1	2	2	1	2
bin150_3	1	1	1	2	1	0	1	2	2	1	0	1	1	2	0	1	0	2	1	2	1	1	1	2	2	1	1	2	2	2	2	0	2	2	2	2	1	0	1	1	1	2	2	1	1	2	2	1	2
bin151_5	1	1	1	2	1	2	1	2	2	1	2	1	0	2	2	1	2	2	1	2	1	1	1	2	2	1	3	2	2	2	2	2	2	2	2	2	1	2	1	1	1	2	2	1	1	2	2	1	2
bin152_4	1	1	1	2	1	2	1	2	2	1	2	1	2	2	2	1	2	2	2	2	1	1	1	2	2	1	2	2	2	2	2	2	2	2	2	2	1	2	1	1	1	2	0	1	1	2	2	1	2
bin153_1	1	1	1	2	1	0	1	2	2	1	0	1	3	2	0	1	0	2	3	0	1	1	1	0	2	1	3	2	2	2	0	0	0	2	2	2	0	0	1	1	1	2	0	1	1	2	2	1	2
bin154_3	1	1	1	2	1	0	1	2	2	1	0	1	3	2	2	1	0	2	3	0	1	1	1	2	2	1	1	2	2	2	0	0	0	0	2	2	1	0	1	1	1	2	0	1	1	2	2	1	1
bin155_3	1	1	1	2	1	1	2	2	2	1	2	1	3	2	2	2	2	2	1	2	1	1	1	2	2	1	1	2	2	2	2	2	2	2	2	2	1	2	1	1	2	2	1	1	2	2	2	1	1
bin156_4	1	1	1	2	1	1	2	2	2	1	0	1	3	2	2	2	0	2	1	2	1	1	1	2	2	1	1	2	2	2	0	0	2	2	2	2	1	2	1	1	3	2	1	1	2	2	2	1	1
bin157_6	1	1	1	2	1	1	2	2	2	1	2	1	3	2	2	2	2	2	1	2	1	1	1	2	2	1	1	2	2	2	0	0	2	2	2	2	1	0	1	1	3	2	1	1	2	2	2	1	1
bin158_2	1	1	1	2	1	1	2	2	0	1	0	1	3	2	2	2	2	2	1	2	1	0	1	2	3	1	1	2	2	2	0	2	2	0	2	2	1	2	1	2	3	2	0	1	2	2	2	1	1
bin159_15	1	1	1	2	1	1	2	2	2	1	2	1	2	2	1	2	1	2	1	2	1	1	1	2	2	1	1	2	2	2	2	2	2	2	2	2	1	2	1	2	2	2	1	1	2	2	2	1	1
bin160_9	1	1	1	2	1	1	2	2	2	1	2	1	2	2	1	2	1	2	1	2	1	1	1	2	2	1	1	2	2	2	2	2	2	2	2	2	1	2	1	2	3	2	1	1	2	2	2	1	1
bin161_14_267_1	1	1	1	2	1	1	2	2	2	1	2	1	2	2	1	2	1	2	1	2	1	1	1	2	2	1	1	2	2	2	2	2	2	2	2	2	1	2	1	2	3	2	1	1	2	2	2	1	1
bin161_14_267_2	1	1	1	2	1	1	2	2	2	1	2	1	2	2	1	2	1	2	1	2	1	1	1	2	2	1	1	2	2	2	2	2	2	2	2	2	1	2	1	2	3	2	1	1	2	2	2	1	1
bin162_5	1	1	1	2	1	1	2	2	2	1	2	1	2	2	1	2	1	2	1	2	1	1	1	2	2	1	1	2	2	2	2	2	2	2	2	2	1	2	1	2	2	2	1	1	2	2	2	1	1
bin163_1	1	1	1	2	1	1	0	2	2	1	0	1	3	2	1	2	1	2	0	2	1	1	1	2	3	1	1	2	2	2	0	0	2	2	2	2	1	2	1	2	3	2	0	1	0	2	2	1	1
bin164_64	1	1	1	2	1	1	2	2	2	1	2	1	2	2	1	2	1	2	1	2	1	1	1	2	1	1	1	2	2	2	2	2	2	2	2	2	1	2	1	2	1	2	1	1	2	2	2	1	1
bin165_1	1	1	1	0	1	0	0	0	0	1	0	0	1	2	0	0	0	2	1	0	0	0	1	0	0	1	1	0	0	0	0	0	0	0	0	2	0	0	1	1	1	2	0	1	0	2	0	1	1
bin166_17	1	1	1	2	1	1	2	2	2	1	2	1	1	2	1	2	1	2	1	2	1	1	1	2	1	1	1	2	2	2	2	2	2	2	2	2	1	2	1	2	3	2	1	1	2	2	2	1	1
bin167_4	1	1	0	0	1	1	2	0	0	1	0	1	0	2	1	0	1	2	1	0	1	1	1	0	1	1	1	0	0	0	0	0	0	0	2	0	1	0	1	0	1	2	1	1	0	2	0	1	1
bin168_6	1	1	1	2	1	1	2	2	2	1	2	1	3	2	1	2	1	2	1	2	1	1	1	2	3	1	1	2	2	2	2	2	2	2	2	2	1	2	1	2	3	2	1	1	2	2	2	1	1
bin169_1	1	1	1	2	1	0	0	2	2	1	0	1	3	2	0	0	0	2	1	0	0	1	1	2	0	1	1	2	2	0	0	0	0	0	2	2	0	0	0	2	3	2	0	1	2	2	2	1	1
bin170_12	1	1	1	2	1	1	2	2	2	1	2	1	1	2	1	2	1	2	1	2	1	1	1	2	1	1	1	2	2	2	2	2	2	2	2	2	1	2	1	2	3	2	1	1	2	2	2	1	1
bin171_14_39_1	1	1	1	2	1	1	2	2	2	1	2	1	1	2	1	2	1	2	1	2	1	1	1	2	1	1	1	2	2	2	2	2	2	2	2	2	1	1	1	2	1	2	1	1	2	2	2	1	1
bin171_14_39_2	1	1	1	2	1	1	2	2	2	1	2	1	1	2	1	2	1	2	1	2	1	1	1	2	1	1	1	2	2	2	2	2	2	2	2	2	1	2	1	2	1	2	1	1	2	2	2	1	1
bin172_1	1	1	1	2	1	0	2	2	2	1	2	1	3	2	0	2	1	2	1	2	1	1	1	2	3	1	1	2	2	2	0	0	2	2	2	2	0	0	1	2	3	2	1	1	2	2	2	1	1
bin173_12	1	1	2	2	1	1	2	2	2	1	0	1	1	2	1	2	1	2	1	2	1	1	1	2	1	1	1	2	2	2	2	0	2	2	2	2	1	0	1	2	1	2	1	1	2	2	2	1	1
bin174_55_296_1	1	1	2	2	1	1	2	2	2	1	2	1	2	2	1	2	1	2	1	2	1	1	1	2	1	1	1	2	2	2	2	2	2	2	2	2	1	2	1	2	1	2	1	1	2	2	2	1	1
bin174_55_296_2	1	1	2	2	1	1	2	2	2	1	2	1	2	2	1	2	1	2	1	2	1	1	1	2	1	1	1	2	2	2	2	2	2	2	2	2	1	2	1	2	1	2	1	1	2	2	2	1	1
bin175_22	1	1	2	2	1	1	2	2	2	1	2	1	2	2	1	2	1	2	1	2	1	1	1	2	1	1	1	2	2	2	2	2	2	2	2	2	1	2	1	2	3	2	1	1	2	2	2	1	1
bin176_17	1	1	2	2	1	1	2	2	2	1	0	1	3	2	1	2	1	2	1	2	1	1	1	2	1	1	1	2	2	2	2	2	2	2	2	2	1	2	1	2	1	2	1	1	2	2	2	1	1
bin177_199_237_1	1	1	2	2	1	1	2	2	2	1	2	1	2	2	1	2	1	2	1	2	1	1	1	2	1	1	1	2	2	2	2	2	2	2	2	2	1	2	1	2	2	2	1	1	2	2	2	1	1
bin177_199_237_2	1	1	2	2	1	1	2	2	2	1	2	1	2	2	1	2	1	2	1	2	1	1	1	2	1	1	1	2	2	2	2	2	2	2	2	2	1	2	1	2	2	2	1	1	2	2	2	1	1
bin178_112	1	1	2	2	1	1	2	2	2	1	2	1	2	2	1	2	1	2	1	2	1	1	1	2	2	1	1	2	2	2	2	2	2	2	2	2	1	2	1	2	2	2	1	1	2	2	2	1	1
bin179_69	1	1	2	2	1	1	2	2	2	1	2	1	1	2	1	2	1	2	1	2	1	1	1	2	2	1	1	2	2	2	2	2	2	2	2	2	1	2	1	2	2	2	1	1	2	2	2	1	1
bin180_16	1	1	2	2	1	1	2	2	2	1	2	1	2	2	1	2	1	2	1	2	1	1	1	2	3	1	1	2	2	2	2	2	2	2	2	2	1	2	1	2	2	2	1	1	2	2	2	1	1
bin181_35	1	1	2	2	1	1	2	2	2	1	2	1	2	2	1	2	1	2	1	2	1	1	1	2	2	1	1	2	2	2	2	2	2	2	2	2	1	2	1	2	2	2	1	1	2	2	2	1	1
bin182_17_237_1	1	1	2	2	1	1	2	2	2	1	2	1	2	2	1	2	1	2	1	2	1	1	1	2	2	1	1	2	2	2	2	2	2	2	2	2	1	2	1	2	2	2	1	1	2	2	2	1	1
bin182_17_237_2	1	1	2	2	1	1	2	2	2	1	2	1	2	2	1	2	1	2	1	2	1	1	1	2	2	1	1	2	2	2	2	2	2	2	2	2	1	2	1	2	2	2	1	1	2	2	2	1	1
bin183_1	0	0	1	2	1	1	2	2	2	1	0	1	0	2	1	2	0	2	1	2	1	0	1	2	2	1	0	2	2	2	2	2	0	2	2	2	0	2	1	2	0	2	0	1	2	2	2	1	1
bin184_2	2	1	2	2	2	2	1	2	2	2	0	2	2	2	2	2	2	2	2	0	0	1	1	1	2	2	1	2	2	1	0	2	2	1	1	1	2	0	1	3	2	1	1	2	2	2	1	1	1
bin185_1	2	0	2	2	2	2	1	2	2	2	0	2	2	2	0	2	0	2	2	2	2	0	1	1	2	2	1	2	2	1	0	0	2	1	1	1	0	0	1	3	2	1	0	2	2	2	1	1	1
bin186_1	2	1	2	2	2	2	0	0	2	2	0	0	0	2	2	0	0	0	0	0	0	0	0	0	2	2	3	2	2	0	0	2	0	1	1	1	0	0	1	3	2	1	1	2	0	0	0	1	1
bin187_4	2	1	2	2	2	2	1	2	2	2	0	2	2	2	2	2	2	2	2	2	2	1	1	1	2	2	3	2	2	1	2	2	2	1	1	1	3	2	1	3	2	1	1	2	2	2	2	1	1
bin188_3	2	1	2	2	2	2	1	2	2	2	0	2	2	2	2	2	2	2	2	2	2	1	1	1	2	2	3	2	2	1	2	2	1	1	1	1	0	2	1	3	2	1	0	2	2	2	2	1	1
bin189_2	2	1	2	2	2	2	1	2	2	2	0	2	2	2	2	2	2	2	2	0	2	1	1	1	2	2	3	2	2	1	0	2	1	1	1	1	2	0	1	3	2	1	1	2	2	2	2	1	1
bin190_1	2	1	2	2	2	2	1	2	2	2	0	2	2	2	2	2	2	2	2	2	2	1	1	1	2	2	3	2	2	1	0	2	0	1	1	1	2	2	1	3	2	1	1	2	2	2	2	1	1
bin191_2	2	1	2	2	2	0	1	2	2	2	0	2	2	2	0	2	2	2	2	2	2	1	1	1	2	2	3	2	2	1	0	0	0	1	1	1	2	0	1	1	2	1	1	2	2	2	2	1	1
bin192_1	2	1	2	2	1	2	1	2	2	2	0	2	2	2	2	2	0	2	2	0	2	1	1	1	2	2	3	2	2	1	0	2	1	0	3	1	0	0	1	1	2	1	0	2	2	2	2	1	1
bin193_1	2	1	2	2	1	2	1	2	2	2	2	2	2	2	1	2	2	2	2	2	2	1	1	1	2	2	1	2	2	1	0	0	0	1	3	1	2	0	1	1	2	1	0	2	2	2	2	1	1
bin194_4	2	1	2	2	1	2	1	2	2	2	0	2	2	2	1	2	0	2	0	0	0	1	1	1	2	2	1	2	0	2	0	0	0	1	1	1	2	0	1	1	2	1	0	2	2	2	2	1	2
bin195_4	2	1	2	2	1	2	1	2	2	2	2	2	2	2	1	2	2	2	2	0	2	0	1	1	2	2	3	2	2	2	0	0	2	1	1	1	2	1	1	1	2	1	0	2	2	2	2	1	2
bin196_2	2	1	2	2	1	2	1	2	2	2	0	2	2	2	1	2	0	2	2	0	2	1	1	1	2	2	3	2	2	2	0	2	2	1	3	1	2	0	1	1	2	1	0	2	2	2	2	1	2
bin197_3	2	1	2	2	1	2	1	2	2	2	2	2	2	2	1	2	1	2	2	2	2	1	1	1	2	2	3	2	2	2	2	2	2	1	1	1	2	1	1	1	2	1	1	2	2	2	2	1	2
bin198_1	2	1	2	2	1	2	1	2	2	2	2	2	2	2	1	2	1	2	2	2	2	1	1	1	2	2	3	2	2	2	0	2	1	2	3	1	0	1	1	1	2	1	1	2	2	2	0	1	2
bin199_3	2	1	2	2	1	2	1	2	2	2	0	2	2	2	1	2	1	2	2	2	2	1	1	1	2	2	3	2	2	2	2	0	1	2	2	1	2	0	1	1	2	1	0	2	2	2	2	1	2
bin200_2	2	1	2	2	1	2	0	2	2	2	0	2	2	2	0	2	0	2	2	2	2	0	1	1	2	2	2	2	2	2	2	2	0	2	2	1	2	0	1	1	2	1	0	2	2	2	2	1	2
bin201_1	2	1	2	2	1	2	1	2	0	2	2	2	2	2	1	2	1	2	2	2	2	1	1	1	2	2	3	2	2	2	2	2	1	2	2	1	2	1	1	1	2	1	1	2	1	2	0	1	2
bin202_1	2	0	2	2	1	2	0	2	2	2	0	2	2	2	0	2	0	2	2	0	2	0	1	1	2	2	3	2	2	2	0	0	1	2	2	1	0	0	1	1	2	1	0	2	1	2	0	1	2
bin203_3	2	1	2	2	1	2	1	1	2	2	2	2	2	2	1	2	1	2	2	2	2	0	1	1	2	2	3	2	2	2	0	2	1	2	2	1	2	1	1	1	2	1	1	2	1	2	2	1	2
bin204_3	2	1	2	2	1	2	1	1	2	2	0	2	2	2	1	2	1	2	2	0	2	1	1	1	2	2	3	2	2	2	0	2	0	2	2	1	0	0	1	1	2	1	1	2	1	2	2	1	2
bin205_4	2	1	2	2	1	2	1	1	2	2	0	2	2	2	1	2	1	2	2	2	2	1	1	1	2	2	3	2	2	2	2	2	1	2	2	1	2	1	1	1	2	1	1	2	1	2	2	1	2
bin206_4	2	1	2	2	1	2	1	1	2	2	0	2	2	2	1	2	1	2	2	2	2	1	1	1	2	2	3	2	2	2	2	0	1	2	2	1	2	1	1	1	2	1	0	2	1	2	0	1	2
bin207_2	2	1	2	2	1	0	0	1	0	2	0	2	2	2	1	2	0	2	2	0	0	1	1	1	2	2	3	2	0	0	0	0	1	2	2	1	0	0	1	1	2	1	0	2	1	2	2	1	2
bin208_7	2	1	2	2	1	2	1	1	2	2	0	2	2	2	1	2	1	2	2	0	2	2	1	1	2	2	3	2	2	2	2	2	1	2	2	1	0	1	1	1	2	1	1	2	1	2	2	1	2
bin209_28	2	1	2	2	1	2	1	1	2	2	2	2	2	2	1	2	1	2	2	2	2	2	1	1	2	2	2	2	2	2	2	2	1	2	2	1	2	1	1	1	2	1	1	2	1	2	2	1	2
bin210_117_218_4_1_1	2	1	2	2	1	2	1	1	2	2	2	2	2	2	1	2	1	2	2	2	2	2	1	1	2	2	2	2	2	2	2	2	1	2	2	1	2	1	1	1	2	1	1	2	1	2	2	1	2
bin210_117_218_4_1_2	2	1	2	2	1	2	1	1	2	2	2	2	2	2	2	2	1	2	2	2	2	2	1	1	2	2	2	2	2	2	2	2	1	2	2	1	2	1	1	1	2	1	1	2	1	2	2	1	2
bin210_117_218_4_2_1	2	1	2	2	1	2	2	1	2	2	2	2	2	2	1	2	1	2	2	2	2	2	1	1	2	2	2	2	2	2	2	2	1	2	2	1	2	1	1	1	2	1	1	2	1	2	2	1	2
bin210_117_218_4_2_2	2	1	2	2	1	2	2	1	2	2	2	2	2	2	2	2	1	2	2	2	2	2	1	1	2	2	2	2	2	2	2	2	1	2	2	1	2	1	1	1	2	1	1	2	1	2	2	1	2
bin211_76	2	1	2	2	1	2	1	1	2	2	2	2	2	2	1	2	1	2	2	2	2	2	1	1	2	2	2	2	2	2	2	2	1	2	2	1	2	1	1	1	2	1	1	2	1	2	2	1	2
bin212_1	2	0	2	2	1	2	0	0	2	2	2	2	2	2	1	2	0	2	2	0	2	2	0	0	2	2	0	2	0	2	0	0	0	2	2	1	2	0	0	0	2	1	0	2	0	2	2	1	2
bin213_22	2	1	2	2	1	2	1	1	2	2	2	2	2	2	1	2	1	2	2	2	2	2	1	1	2	2	3	2	2	2	2	2	1	2	2	1	2	1	1	1	2	1	1	2	1	2	2	1	2
bin214_1	2	1	2	2	2	2	1	2	2	2	0	1	2	2	0	2	0	2	2	2	1	1	1	1	2	2	1	2	2	2	0	0	0	1	2	2	2	0	1	1	2	2	2	2	2	2	2	1	2
bin215_1	2	1	2	2	2	2	1	2	2	2	2	1	2	2	1	2	1	2	2	2	1	1	1	1	2	2	1	2	2	2	1	2	2	1	2	2	2	2	1	1	2	2	2	2	2	2	2	1	2
bin216_1	2	1	2	2	2	2	1	2	2	2	2	1	2	2	1	2	1	2	2	2	1	1	1	1	2	2	1	2	2	2	1	2	2	1	2	2	2	2	1	1	2	2	2	2	2	2	0	1	2
bin217_3	2	1	2	2	2	2	1	2	2	2	2	1	2	1	1	2	1	2	2	0	1	1	1	1	2	2	1	1	2	2	1	2	1	1	2	1	2	2	1	1	2	1	1	2	2	2	2	1	2
bin218_4	2	1	2	2	2	2	1	1	2	2	2	1	2	2	1	2	1	2	2	2	1	0	1	1	2	2	1	2	2	2	0	2	1	2	2	1	2	2	1	1	2	1	1	2	1	2	2	1	2
bin219_2	2	1	2	2	2	2	1	1	2	2	2	1	2	2	1	2	1	2	2	2	1	1	1	1	2	2	3	2	2	2	0	0	1	2	2	1	2	0	1	1	2	1	1	2	1	2	2	1	2
bin220_5	2	1	2	2	2	2	1	1	2	2	2	1	2	2	1	2	1	2	2	2	1	1	1	1	2	2	1	2	2	2	2	2	1	2	2	1	2	1	1	1	2	1	1	2	1	2	2	1	2
bin221_1	2	1	2	2	1	0	1	1	0	2	0	2	0	2	0	2	1	2	2	0	0	2	1	1	2	2	3	2	2	2	0	0	1	2	2	1	2	0	0	1	2	1	0	2	1	2	2	1	2
bin222_330_313_1	2	1	2	2	1	2	1	1	2	2	2	2	2	2	1	2	1	2	2	2	2	2	1	1	2	2	1	2	2	2	2	2	1	2	2	1	2	1	1	1	2	1	1	2	1	2	2	1	2
bin222_330_313_2	2	1	2	2	1	2	1	1	2	2	2	2	2	2	1	2	1	2	2	2	2	2	1	1	2	2	2	2	2	2	2	2	1	2	2	1	2	1	1	1	2	1	1	2	1	2	2	1	2
bin223_81	2	1	2	2	1	2	1	1	2	2	2	2	2	2	1	2	1	2	2	2	2	2	1	1	2	2	1	2	2	2	2	2	1	2	2	1	2	1	1	1	2	1	1	2	1	2	2	1	2
bin224_5	2	1	2	2	1	2	1	1	2	2	2	2	2	2	1	2	1	2	2	2	2	2	1	1	2	2	3	2	2	2	2	2	1	2	2	1	2	1	1	1	2	1	1	2	1	2	2	1	2
bin225_5	2	1	2	2	1	2	1	1	2	2	2	2	2	2	1	2	1	2	2	2	2	2	1	1	2	2	2	2	2	2	2	2	1	2	2	1	2	1	1	2	2	1	1	2	1	2	2	1	2
bin226_1	2	0	2	2	1	2	1	0	2	2	0	2	2	2	0	2	1	2	2	0	0	2	1	1	2	2	3	2	2	2	2	0	0	2	2	1	2	0	0	2	2	1	1	2	1	2	2	0	2
bin227_8	2	1	2	2	1	2	1	1	2	2	2	2	2	2	1	2	1	2	2	2	2	2	1	1	2	2	2	2	2	2	2	2	1	2	2	1	2	0	1	2	2	1	1	2	1	2	2	1	2
bin228_15	2	1	2	2	1	2	1	1	2	2	2	2	2	2	1	2	1	2	2	2	2	1	1	1	2	2	3	2	2	2	2	2	1	2	2	1	2	1	1	2	2	1	1	2	1	2	2	1	2
bin229_48	2	1	2	2	1	2	1	1	2	2	2	2	2	2	1	2	1	2	2	2	2	1	1	1	2	2	1	2	2	2	2	2	1	2	2	1	2	1	1	2	2	1	1	2	1	2	2	1	2
bin230_40	2	1	2	2	1	2	1	1	2	2	2	2	2	2	1	2	1	2	2	2	2	1	1	1	2	2	3	2	2	2	2	2	1	2	2	1	2	1	1	2	2	1	1	2	1	2	2	1	2
bin231_1	0	1	0	1	1	0	0	1	0	1	0	0	0	0	1	0	1	1	0	0	0	0	1	1	1	0	1	0	0	2	0	0	1	0	0	0	0	1	1	1	0	1	0	0	1	2	0	1	0
bin232_4	1	2	1	1	1	1	1	2	2	2	0	1	1	2	1	2	0	1	2	2	1	2	2	1	1	2	2	1	2	2	0	1	2	2	1	1	2	0	1	2	2	2	1	2	1	1	2	2	1
bin233_2	0	0	1	1	1	0	0	2	2	2	0	0	1	2	0	2	0	2	2	0	0	0	2	1	1	2	2	1	0	0	0	0	0	0	1	1	2	0	0	2	2	2	0	2	1	1	0	2	1
bin234_1	2	2	1	1	1	0	0	2	2	2	0	1	1	2	0	2	0	2	2	0	0	2	2	1	1	2	2	1	2	2	0	0	2	2	1	1	0	0	1	2	2	2	1	2	1	1	2	2	1
bin235_5	2	2	1	1	1	0	1	2	2	2	0	1	1	2	2	2	2	2	2	0	1	2	2	1	2	2	1	1	2	2	0	1	2	2	1	1	2	0	2	2	2	1	1	2	1	1	2	2	1
bin236_1	2	2	1	1	1	0	1	2	2	2	2	1	1	2	2	2	0	2	2	0	0	2	2	1	2	2	1	1	2	2	0	0	2	2	1	1	2	0	2	2	2	1	1	2	1	1	1	2	1
bin237_2	2	2	1	1	1	1	2	1	2	2	2	1	1	2	2	2	2	2	2	2	1	2	2	1	2	2	1	1	2	2	1	1	2	2	1	1	2	2	2	2	2	2	2	2	2	2	1	2	1
bin238_1	2	2	1	2	2	1	0	1	2	2	0	1	1	2	2	0	2	2	2	2	1	2	2	3	2	2	1	1	2	2	1	0	2	2	1	1	2	0	3	2	2	2	2	2	2	2	0	1	1
bin239_2	2	2	1	2	2	1	2	1	2	2	2	1	1	2	2	2	2	2	2	2	1	2	2	2	2	2	1	1	2	2	1	2	2	2	1	1	2	2	3	2	2	2	2	2	2	2	1	1	1
bin240_5	2	2	1	2	2	0	2	1	2	2	0	1	1	2	2	2	2	2	2	0	1	2	2	2	2	2	1	1	2	2	0	2	2	2	1	1	2	0	3	2	2	2	2	2	2	2	1	1	1
bin241_1	2	2	1	2	2	1	2	1	2	2	2	1	1	2	2	2	2	2	2	0	1	2	2	2	2	2	1	1	2	2	1	2	2	2	1	1	2	2	3	2	2	2	2	2	2	2	1	1	1
bin242_3	2	2	1	1	2	1	2	1	2	2	0	1	1	2	2	2	0	2	2	0	1	2	2	2	2	2	1	1	2	2	1	0	0	2	1	1	2	0	1	2	2	2	2	2	2	2	1	1	1
bin243_3	2	2	1	1	2	1	2	1	0	2	0	1	1	2	0	2	2	2	2	0	1	1	2	2	2	2	1	1	2	0	1	0	0	2	1	2	0	0	1	2	2	2	0	2	2	2	1	1	1
bin244_6	2	2	1	1	2	1	2	1	2	2	2	1	1	2	2	2	2	2	2	2	1	1	2	2	2	2	1	1	2	2	1	2	2	2	1	2	2	2	1	2	2	2	2	2	2	2	1	1	1
bin245_7	2	2	1	1	2	1	2	1	2	2	2	1	1	2	2	2	2	1	2	2	1	1	2	2	2	2	1	1	2	2	1	2	2	2	1	2	2	2	1	2	2	2	2	2	2	2	1	1	1
bin246_3	2	2	1	1	2	1	2	1	2	2	2	1	1	2	2	2	2	1	2	2	1	1	2	2	2	2	1	1	2	2	1	2	2	2	1	2	2	2	1	2	2	2	2	2	2	2	1	1	1
bin247_3	2	2	1	1	2	0	0	1	2	2	0	0	1	2	0	2	0	1	2	0	1	0	2	2	2	2	1	1	0	2	0	0	0	2	1	2	2	0	1	2	2	2	0	2	2	2	0	1	1
bin248_11_176_1	2	2	1	1	2	1	2	1	2	2	2	1	1	1	1	2	1	1	2	2	1	1	2	2	2	2	1	1	2	2	1	2	2	2	1	2	2	2	1	2	2	2	2	2	2	2	1	1	1
bin248_11_176_2	2	2	1	1	2	2	2	1	2	2	2	1	1	1	1	2	1	1	2	2	1	1	2	2	2	2	1	1	2	2	1	2	2	2	1	2	2	2	1	2	2	2	2	2	2	2	1	1	1
bin249_4	2	2	1	1	2	2	2	1	2	2	2	1	1	1	1	2	1	1	2	2	1	1	2	2	2	2	1	2	2	2	1	2	2	2	1	2	2	2	1	2	2	1	2	2	2	2	1	1	1
bin250_5	2	2	1	1	2	2	2	1	2	2	2	1	1	1	1	2	1	1	2	2	1	2	2	2	2	2	1	2	2	2	1	2	2	2	1	2	2	2	1	2	2	1	2	2	2	2	1	1	1
bin251_3	2	2	1	1	2	2	2	1	2	2	2	1	1	1	1	2	1	1	2	2	1	2	2	2	2	2	1	2	2	2	1	2	2	2	1	2	2	2	1	2	2	1	2	2	2	2	1	1	1
bin252_5	2	0	1	0	2	0	0	0	2	2	0	0	0	1	0	2	0	1	2	2	1	2	2	2	2	2	1	2	0	0	0	0	0	0	0	2	2	0	0	2	2	0	0	2	2	2	1	1	1
bin253_20	2	2	1	1	2	2	2	1	2	2	2	1	1	1	1	2	1	1	2	2	1	2	2	2	2	2	1	2	2	2	1	2	2	2	1	2	2	2	1	2	2	1	2	2	2	2	1	1	1
bin254_7	2	2	1	1	2	2	2	1	2	2	2	1	1	1	1	2	1	1	2	2	1	2	2	2	2	2	1	2	2	2	1	2	2	2	1	2	2	2	1	2	2	1	2	2	2	2	1	1	1
bin255_3	2	2	1	1	2	2	2	0	2	2	2	1	1	1	1	2	1	1	2	2	1	2	2	2	2	2	1	2	2	2	1	2	0	2	1	2	2	2	0	2	2	1	2	2	2	2	0	1	1
bin256_12	2	2	1	1	2	2	2	1	2	2	2	1	1	1	1	2	1	1	2	2	1	2	2	2	2	2	1	2	2	2	1	2	2	2	1	2	2	2	1	2	2	1	2	2	2	2	1	1	1
bin257_13	2	2	1	1	2	2	2	1	2	2	2	1	1	1	1	2	1	1	2	2	1	2	2	2	2	2	1	2	2	2	1	2	2	2	1	2	2	2	1	2	2	1	2	2	2	2	1	1	1
bin258_6_241_1	2	2	1	1	2	2	2	1	1	2	2	1	1	1	1	2	1	1	2	2	1	2	2	2	2	2	1	2	2	2	1	2	2	2	1	2	2	2	1	2	2	1	2	2	2	2	1	1	1
bin258_6_241_2	2	2	1	1	2	2	2	1	2	2	2	1	1	1	1	2	1	1	2	2	1	2	2	2	2	2	1	2	2	2	1	2	2	2	1	2	2	2	1	2	2	1	2	2	2	2	1	1	1
bin259_236_46_42_97_1_1_1	2	2	1	1	2	2	2	1	1	2	2	1	1	1	1	2	1	1	2	2	2	2	2	2	2	2	1	2	1	2	1	2	2	2	1	2	2	2	1	2	2	1	2	2	2	2	1	1	1
bin259_236_46_42_97_1_1_2	2	2	1	1	2	2	2	1	1	2	2	1	1	1	1	2	1	1	2	2	2	2	2	2	2	2	1	2	1	2	1	2	2	2	1	2	2	2	1	2	2	1	2	2	2	2	1	1	1
bin259_236_46_42_97_1_2_1	2	2	1	1	2	2	2	1	1	2	2	1	1	1	1	2	1	1	2	2	2	2	2	2	2	2	1	2	1	2	1	2	2	2	1	2	2	2	2	2	2	1	2	2	2	2	1	1	1
bin259_236_46_42_97_1_2_2	2	2	1	1	2	2	2	1	1	2	2	1	1	1	1	2	1	1	2	2	2	2	2	2	2	2	1	2	1	2	1	2	2	2	1	2	2	2	2	2	2	1	2	2	2	2	1	1	1
bin259_236_46_42_97_2_1_1	2	2	1	1	2	2	2	1	1	2	2	1	1	1	1	2	1	1	2	2	2	2	2	2	2	2	1	2	2	2	1	2	2	2	1	2	2	2	1	2	2	1	2	2	2	2	1	1	1
bin259_236_46_42_97_2_1_2	2	2	1	1	2	2	2	1	1	2	2	1	1	1	1	2	1	1	2	2	2	2	2	2	2	2	1	2	2	2	1	2	2	2	1	2	2	2	1	2	2	1	2	2	2	2	1	1	1
bin259_236_46_42_97_2_2_1	2	2	1	1	2	2	2	1	1	2	2	1	1	1	1	2	1	1	2	2	2	2	2	2	2	2	1	2	2	2	1	2	2	2	1	2	2	2	2	2	2	1	2	2	2	2	1	1	1
bin259_236_46_42_97_2_2_2	2	2	1	1	2	2	2	1	1	2	2	1	1	1	1	2	1	1	2	2	2	2	2	2	2	2	1	2	2	2	1	2	2	2	1	2	2	2	2	2	2	1	2	2	2	2	1	1	1
bin260_6	2	2	1	1	2	2	2	1	1	2	2	1	1	1	1	2	1	1	2	2	2	2	2	2	2	2	1	2	1	2	0	2	2	2	1	2	2	2	1	2	2	1	2	2	2	2	1	1	1
bin261_19	2	2	1	1	2	2	2	1	1	2	2	1	1	1	1	2	1	1	2	2	2	2	2	2	2	2	1	2	1	2	1	2	2	2	1	2	2	2	2	2	2	1	2	2	2	2	1	1	1
bin262_163	2	2	1	1	2	2	2	1	1	2	2	1	1	1	1	2	1	1	2	2	2	2	2	2	2	2	1	2	1	2	1	2	2	2	1	2	2	2	1	2	2	1	2	2	2	2	1	1	1
bin263_50_86_1	2	2	1	1	2	2	2	1	1	2	2	1	1	1	1	2	1	1	2	2	1	2	2	2	2	2	1	2	2	2	1	2	2	2	1	2	2	2	3	2	2	1	2	2	2	2	1	1	1
bin263_50_86_2	2	2	1	1	2	2	2	1	1	2	2	1	1	1	1	2	1	1	2	2	2	2	2	2	2	2	1	2	2	2	1	2	2	2	1	2	2	2	3	2	2	1	2	2	2	2	1	1	1
bin264_1	2	2	1	1	2	2	0	1	2	2	0	1	1	1	1	0	0	1	2	0	0	0	2	2	2	2	1	2	2	0	1	0	0	2	1	2	0	0	3	2	2	1	2	2	2	2	0	1	1
bin265_5	2	2	1	1	2	2	2	1	2	2	2	1	1	1	1	2	1	1	2	0	1	2	2	2	2	2	1	2	2	2	0	2	2	2	1	2	2	2	3	2	2	1	2	2	2	2	1	1	1
bin266_11	2	2	1	1	2	2	2	1	2	2	2	1	1	1	1	2	1	1	2	2	1	2	2	2	2	2	1	2	2	2	1	2	2	2	1	2	2	2	1	2	2	1	2	2	2	2	1	1	1
bin267_3	2	2	1	1	2	2	2	1	2	2	2	1	1	1	1	2	1	1	2	2	1	1	2	2	2	2	1	1	2	2	1	2	2	2	1	2	2	2	3	2	2	2	2	2	2	2	1	1	1
bin268_9	2	2	1	1	2	2	2	1	2	2	2	1	1	1	1	2	1	1	2	2	1	1	2	2	2	2	1	1	2	2	1	2	2	2	1	2	2	2	1	2	2	2	2	2	2	2	1	1	1
bin269_1	2	2	1	1	2	2	0	1	0	2	0	1	1	1	1	0	1	1	2	2	0	0	2	2	2	2	1	2	2	2	1	0	2	2	1	2	2	0	1	2	2	1	0	2	2	2	0	1	1
bin270_1	2	2	1	1	2	2	2	1	2	2	2	1	1	1	1	2	1	1	2	2	1	1	2	2	2	2	1	2	2	2	1	3	2	2	1	2	2	2	1	2	2	1	2	2	2	2	1	1	1
bin271_2	2	2	1	1	2	2	0	1	2	2	0	1	1	1	1	2	0	1	2	0	0	0	2	2	2	2	1	2	2	2	0	2	2	2	1	2	0	0	0	2	2	0	2	2	2	2	1	1	1
bin272_3_88_1	2	2	1	1	2	2	2	1	2	2	2	1	1	1	1	2	1	1	2	2	1	2	2	2	2	2	1	2	2	2	0	2	2	2	1	2	2	2	3	2	2	1	2	2	2	2	1	1	1
bin272_3_88_2	2	2	1	1	2	2	2	1	2	2	2	1	1	1	1	2	1	1	2	2	1	2	2	2	2	2	1	2	2	2	0	2	2	2	1	2	2	2	3	2	2	1	2	2	2	2	1	1	1
bin273_3	2	2	1	1	2	2	2	1	2	2	2	1	1	1	1	2	1	1	2	2	1	2	2	2	2	2	1	2	2	2	1	2	2	2	1	2	2	0	1	2	2	1	2	2	2	2	1	1	1
bin274_33	2	2	1	1	2	2	2	1	1	2	2	1	1	1	1	2	1	1	2	2	2	2	2	2	2	2	1	2	2	2	1	2	2	2	1	2	2	2	1	2	2	1	2	2	2	2	1	1	1
bin275_83	2	2	1	1	2	2	2	1	1	2	2	1	1	1	1	2	1	1	2	2	2	2	2	2	2	2	1	2	1	2	1	2	2	2	1	2	2	2	1	2	2	1	2	2	2	2	1	1	1
bin276_7	2	2	1	1	2	2	2	1	1	2	0	1	1	1	1	2	1	1	2	2	2	2	2	2	2	2	1	2	1	2	1	2	2	2	1	2	2	2	3	2	2	1	2	2	2	2	1	1	1
bin277_2	2	2	1	1	2	2	2	1	0	2	0	0	1	1	0	0	0	1	2	0	2	0	2	2	2	2	1	2	0	2	0	0	2	2	1	2	2	0	1	2	2	1	0	0	2	2	0	1	0
bin278_9	2	2	1	1	2	2	2	1	1	2	2	1	1	1	1	2	1	1	2	2	2	2	2	2	2	2	1	2	1	2	0	2	2	2	1	2	2	2	1	2	2	1	2	2	2	2	1	1	1
bin279_5	2	2	1	1	2	2	0	1	1	2	0	1	1	1	1	2	1	1	2	0	2	2	2	2	2	2	1	2	1	2	0	0	2	2	1	2	2	0	1	2	2	1	1	2	2	2	1	1	1
bin280_9	2	2	1	1	2	2	2	1	1	2	2	1	1	1	1	2	1	1	2	2	2	2	2	2	2	1	1	2	1	2	1	2	2	2	1	2	2	2	2	1	2	1	1	2	2	2	1	1	1
bin281_1	2	2	1	0	2	0	0	1	0	2	0	1	0	1	0	2	0	1	2	0	2	2	2	2	2	2	1	2	1	2	0	0	0	0	1	2	0	0	2	1	2	1	0	2	2	2	1	1	1
bin282_3	2	2	1	1	2	2	2	1	1	2	0	1	3	1	3	2	0	1	2	2	2	2	2	2	2	2	1	2	1	2	1	0	2	2	1	2	2	2	2	1	2	1	0	2	2	2	1	1	1
bin283_2	0	0	1	1	2	0	0	0	0	2	0	1	0	1	0	0	0	1	2	0	2	2	2	2	2	2	1	2	1	2	0	0	2	2	1	2	0	0	0	1	2	1	0	2	2	2	0	1	1
bin284_1	2	2	1	1	2	2	2	1	1	2	2	1	3	1	2	1	2	1	2	2	2	0	2	2	2	2	1	2	1	2	1	2	2	2	1	2	2	2	2	1	2	1	1	2	2	2	1	1	1
bin285_1	0	0	2	2	2	2	0	2	1	0	2	2	0	1	1	0	1	2	2	2	0	2	1	0	0	0	0	0	2	2	0	0	2	0	1	2	0	2	0	2	2	2	2	2	0	1	2	0	0
bin286_5	1	1	2	2	2	2	1	2	1	1	2	2	1	1	0	2	0	2	2	2	2	2	1	1	2	1	2	1	2	2	0	0	2	1	1	2	1	0	1	2	2	2	2	2	1	1	2	1	2
bin287_1	1	1	2	2	2	2	0	2	1	1	2	2	1	1	0	2	0	2	2	2	2	2	1	1	3	1	2	1	2	2	1	0	2	1	1	2	0	2	1	2	2	2	2	3	1	1	2	1	2
bin288_1	1	1	2	2	1	0	1	2	1	1	0	0	1	1	0	2	0	2	2	0	2	0	1	1	1	1	2	1	2	2	0	0	0	0	1	2	1	0	1	2	2	2	0	3	2	2	2	1	2
bin289_2	1	1	2	2	1	0	1	2	1	1	0	2	1	1	1	2	1	2	2	0	2	2	1	1	1	1	2	1	2	2	1	0	2	1	1	2	1	0	1	2	2	2	0	0	2	2	2	1	2
bin290_8	1	1	2	2	1	2	1	2	1	1	2	2	1	1	1	2	1	2	2	2	2	2	1	1	1	1	2	1	2	2	1	2	2	1	1	2	1	2	1	2	2	2	2	1	2	2	2	1	2
bin291_5	1	1	2	2	1	2	1	2	1	1	2	2	1	1	1	2	1	0	2	0	2	0	1	1	1	1	2	1	0	0	1	0	2	1	1	2	1	0	1	2	2	2	2	1	2	2	0	1	2
bin292_38	1	1	2	2	1	2	1	2	1	1	2	2	1	1	1	2	1	2	2	2	2	2	1	1	1	1	2	1	2	2	1	2	2	1	1	2	1	2	1	2	2	2	2	1	2	2	2	1	2
bin293_10	1	1	2	2	1	2	1	2	1	1	0	2	1	1	1	2	1	2	2	2	2	2	1	1	1	1	2	1	2	2	1	2	2	1	1	2	2	2	1	2	2	2	2	1	2	2	2	1	2
bin294_29_193_1	1	1	2	2	1	2	1	2	1	1	2	2	1	1	1	2	1	2	2	2	2	2	1	1	1	1	2	1	2	2	1	2	2	1	1	2	2	2	1	2	2	2	2	1	2	2	2	1	2
bin294_29_193_2	1	1	2	2	1	2	1	2	1	1	2	2	1	1	1	2	1	2	2	2	2	2	1	1	1	1	2	1	2	2	1	2	2	1	1	2	2	2	1	2	2	2	2	1	2	2	2	1	2
bin295_2	1	0	2	2	1	2	0	2	0	1	2	2	1	1	0	2	0	2	2	2	2	2	1	0	1	1	2	1	2	2	0	0	2	0	0	2	2	2	1	2	2	2	2	1	2	2	2	1	2
bin296_22	1	1	2	2	1	2	1	2	1	1	2	2	1	1	1	2	1	2	2	2	2	2	1	1	1	1	2	1	2	2	1	2	2	1	1	2	2	2	1	2	2	2	2	1	2	2	2	1	2
bin297_219	1	1	2	2	1	2	1	2	1	1	2	2	1	1	1	2	1	2	2	2	2	2	1	1	1	1	2	1	2	2	1	2	2	1	1	2	2	2	1	2	2	2	2	1	2	2	2	1	2
bin298_84	1	1	2	2	1	2	1	2	1	1	2	2	1	1	1	2	1	2	2	2	2	2	1	1	1	1	2	1	2	2	1	2	2	1	1	2	2	2	1	2	2	2	2	1	2	2	2	1	2
bin299_1	1	1	2	0	1	0	1	2	1	1	2	2	1	1	1	0	1	0	2	2	2	0	1	1	1	1	0	1	0	2	1	0	0	1	1	2	0	0	1	0	3	2	2	1	0	2	0	1	0
bin300_184	1	1	2	2	1	2	1	2	1	1	2	2	1	1	1	2	1	2	2	2	2	2	1	1	1	1	2	1	2	2	1	2	2	1	1	2	2	2	1	2	2	2	2	1	2	2	2	1	2
bin301_62_14_156_1_1	1	1	2	2	1	2	1	2	1	1	2	2	1	1	1	2	1	2	2	2	2	2	1	1	1	1	2	1	2	2	1	2	2	1	1	2	2	2	1	2	2	2	2	1	2	2	2	1	2
bin301_62_14_156_1_2	1	1	2	2	1	2	1	2	1	1	2	2	1	1	1	2	1	2	2	2	2	2	1	1	1	1	2	1	2	2	1	2	2	1	1	2	2	2	1	2	2	2	2	1	2	2	2	1	2
bin301_62_14_156_2_1	1	1	2	2	1	2	1	2	1	1	2	2	1	1	1	2	1	2	2	2	2	2	1	1	1	1	2	1	2	2	1	2	2	1	1	2	2	2	1	2	2	2	2	1	2	2	2	1	2
bin301_62_14_156_2_2	1	1	2	2	1	2	1	2	1	1	2	2	1	1	1	2	1	2	2	2	2	2	1	1	1	1	2	1	2	2	1	2	2	1	1	2	2	2	1	2	2	2	2	1	2	2	2	1	2
bin302_49	1	1	2	2	1	2	1	2	1	1	2	2	1	1	1	2	1	2	2	2	2	2	1	1	1	1	2	1	2	2	1	2	2	1	1	2	2	2	1	2	2	2	2	1	2	2	2	1	2
bin303_4	1	1	2	2	1	2	0	2	1	1	0	2	1	1	1	2	1	2	2	0	0	0	1	1	1	1	2	1	2	2	0	0	2	1	1	2	0	2	1	1	2	2	0	1	2	2	0	1	2
bin304_1	1	1	2	2	1	0	1	2	2	1	0	1	1	1	0	2	0	2	2	0	0	1	1	3	1	1	2	1	2	2	0	0	0	1	1	2	2	0	1	1	2	2	0	1	2	2	2	1	2
bin305_2	1	1	2	2	1	2	1	2	2	1	0	1	2	1	1	2	1	2	2	1	2	0	1	1	1	1	2	1	2	2	0	0	0	1	1	2	2	2	1	1	2	2	2	1	2	2	2	1	2
bin306_1	1	1	2	2	1	0	1	2	2	1	0	1	2	1	0	0	0	2	2	0	2	1	1	1	1	1	2	1	1	2	0	0	2	1	1	2	0	0	1	1	2	2	2	1	2	2	0	1	2
bin307_2	2	2	2	2	2	2	2	2	2	2	0	2	2	2	2	2	0	2	2	2	2	2	2	2	2	2	2	2	2	2	0	0	2	1	1	1	1	2	2	2	2	2	2	1	2	1	1	2	2
bin308_1	2	2	2	2	2	2	0	2	0	2	0	2	2	2	2	2	0	2	2	0	0	2	2	2	2	2	2	2	2	2	0	0	0	1	1	1	1	0	2	2	2	1	1	1	2	1	1	2	2
bin309_2	2	0	2	2	2	0	0	2	0	2	0	2	2	2	0	2	0	2	2	2	2	0	2	2	2	2	2	2	2	2	0	0	0	0	1	2	0	0	2	1	2	1	1	1	2	1	2	2	2
bin310_1	2	2	2	2	2	2	2	2	2	2	2	2	2	2	2	2	2	2	2	2	2	2	2	2	2	2	2	2	2	2	2	2	2	1	1	2	3	2	2	1	2	1	1	1	2	1	2	2	2
bin311_1	2	2	2	2	2	2	2	2	2	2	2	2	2	2	2	2	2	2	2	2	2	2	2	2	2	2	2	2	2	2	2	2	2	1	1	2	1	2	2	2	2	1	1	1	2	1	1	2	2
bin312_5	1	1	1	2	2	1	1	1	1	2	1	2	1	1	2	1	2	1	1	2	1	2	2	2	2	1	2	2	1	1	1	1	2	1	1	2	1	2	2	2	1	1	1	1	2	1	1	2	1
bin313_1	1	1	1	2	2	1	1	1	1	2	0	2	1	1	2	1	2	1	1	2	1	2	2	2	2	1	2	2	1	1	0	1	2	1	1	2	1	2	2	2	1	1	1	1	2	1	1	2	1
bin314_2	1	0	1	2	2	0	1	2	0	2	0	2	1	1	2	0	0	1	1	2	0	2	2	2	2	1	2	2	0	0	0	0	0	1	1	2	1	0	2	2	1	1	0	1	2	1	2	2	1
bin315_1	1	1	1	1	2	1	1	2	1	2	1	2	1	1	2	1	2	1	1	2	1	2	2	1	2	1	2	2	1	1	3	1	2	1	1	2	1	2	2	1	1	1	1	1	2	1	2	2	1
bin316_1	1	0	1	1	2	0	0	2	0	2	1	2	1	1	0	0	0	1	1	2	1	2	2	1	2	1	2	2	1	1	1	0	0	1	1	2	1	0	2	1	1	1	1	1	2	1	2	2	1
bin317_1	1	1	1	1	2	1	1	2	1	2	1	2	1	1	0	0	2	1	1	2	0	2	2	1	2	1	2	2	1	1	0	0	0	1	1	2	1	0	2	1	1	1	0	1	2	1	2	2	1
bin318_1	1	0	1	1	2	0	0	2	0	2	0	2	1	1	0	1	0	1	1	2	1	0	2	1	2	1	2	2	1	1	0	0	0	0	1	2	0	0	2	1	1	1	1	1	2	1	2	2	1
bin319_1	1	1	1	1	2	0	0	2	1	2	0	2	1	1	2	1	0	1	2	0	1	2	1	1	2	1	2	2	1	1	3	0	2	1	1	2	0	0	1	1	1	1	1	1	2	1	2	2	1
bin320_2	1	1	1	2	2	1	1	1	2	0	0	2	1	1	0	1	0	2	1	0	1	0	0	0	0	1	0	1	1	1	0	1	0	1	1	1	1	0	0	2	1	2	0	1	0	1	0	2	1
bin321_181_263_1	1	1	1	2	2	1	1	1	1	2	1	2	1	1	2	1	2	2	1	2	1	2	1	2	2	1	2	1	1	1	1	1	2	1	1	1	1	2	2	1	1	1	1	1	2	1	1	2	1
bin321_181_263_2	1	1	1	2	2	1	1	1	1	2	1	2	1	1	2	1	2	2	1	2	1	2	1	2	2	1	2	1	1	1	1	1	2	1	1	1	1	2	2	1	1	1	1	1	2	1	1	2	1
bin322_1	1	1	1	2	2	0	0	0	0	2	0	2	0	0	2	0	2	2	1	2	1	2	0	2	2	0	2	1	1	0	1	1	2	0	0	0	0	2	2	1	1	0	0	1	2	0	0	2	1
bin323_216	1	1	1	2	2	1	1	1	1	2	1	2	1	1	2	1	2	2	1	2	1	2	1	2	2	1	2	1	1	1	1	1	2	1	1	1	1	2	2	1	1	1	1	1	2	1	1	2	1
bin324_45	1	1	1	2	2	1	1	1	1	2	1	2	1	1	2	1	2	2	1	2	1	2	1	2	2	1	2	1	1	1	1	1	2	1	1	1	1	2	2	1	1	1	1	1	2	1	1	2	1
bin325_147_169_1	1	1	1	2	2	1	1	1	1	2	1	2	1	1	2	1	2	2	1	2	1	2	1	2	2	1	2	1	1	1	1	1	2	1	1	1	1	2	2	1	1	1	1	1	2	1	1	2	1
bin325_147_169_2	1	1	1	2	2	1	1	1	1	2	1	2	1	1	2	1	2	2	1	2	1	2	1	2	2	1	2	1	1	1	1	1	2	1	1	1	1	2	2	1	1	1	1	1	2	1	1	2	1
bin326_1	1	1	1	2	2	1	1	1	1	2	1	2	1	1	2	1	0	2	1	0	1	0	2	2	2	1	2	1	1	1	1	1	0	1	1	1	1	0	2	1	1	1	1	1	0	1	1	2	1
bin327_49_49_1	1	1	1	2	2	1	1	1	1	2	1	2	1	1	2	1	2	2	1	2	1	2	1	2	2	1	2	1	1	1	1	1	2	1	1	1	1	2	2	1	1	1	1	1	2	1	1	2	1
bin327_49_49_2	1	1	1	2	2	1	1	1	1	2	1	2	1	1	2	1	2	2	1	2	1	2	1	2	2	1	2	1	1	1	1	1	2	1	1	1	1	2	2	1	1	1	1	1	2	1	1	2	1
bin328_5	1	1	1	2	2	2	1	1	1	2	0	2	1	1	2	1	2	2	1	2	1	2	1	2	2	1	2	1	1	1	1	0	2	1	1	1	1	2	2	1	1	1	1	1	2	1	1	2	1
bin329_7	1	1	1	2	2	2	1	1	1	2	0	2	1	1	2	1	2	2	1	2	1	2	1	2	2	1	2	1	1	1	1	1	2	1	1	1	1	2	2	1	1	1	1	1	2	1	1	2	1
bin330_7	1	1	1	2	2	2	1	2	1	2	1	2	1	1	2	1	2	2	1	2	1	2	1	2	2	1	2	1	1	1	0	1	2	1	1	1	1	2	2	1	1	1	1	1	2	1	1	2	1
[truncated: 124 more columns]

## Sheet: Sheet2
	PhyChr	PhyPos
bin1_2	Peaxi162Scf00261	527310
bin1_2	Peaxi162Scf00295	982218
bin2_2	Peaxi162Scf00353	887063
bin2_2	Peaxi162Scf00164	188121
bin3_202	Peaxi162Scf00124	356183
bin3_202	Peaxi162Scf00044	1234085
bin3_202	Peaxi162Scf00449	46555
bin3_202	Peaxi162Scf00121	2356424
bin3_202	Peaxi162Scf00519	499439
bin3_202	Peaxi162Scf00443	117581
bin3_202	Peaxi162Scf00777	513579
bin3_202	Peaxi162Scf00035	2857825
bin3_202	Peaxi162Scf00124	230248
bin3_202	Peaxi162Scf00443	166656
bin3_202	Peaxi162Scf00044	1597335
bin3_202	Peaxi162Scf00585	578824
bin3_202	Peaxi162Scf00019	1530000
bin3_202	Peaxi162Scf00580	455826
bin3_202	Peaxi162Scf00049	891954
bin3_202	Peaxi162Scf00008	1996399
bin3_202	Peaxi162Scf00777	513550
bin3_202	Peaxi162Scf00059	257245
bin3_202	Peaxi162Scf00950	389692
bin3_202	Peaxi162Scf02748	48180
bin3_202	Peaxi162Scf00155	1259990
bin3_202	Peaxi162Scf00990	19697
bin3_202	Peaxi162Scf00049	1024723
bin3_202	Peaxi162Scf00777	513585
bin3_202	Peaxi162Scf00155	1259916
bin3_202	Peaxi162Scf00229	912566
bin3_202	Peaxi162Scf00080	1328159
bin3_202	Peaxi162Scf00124	1122941
bin3_202	Peaxi162Scf00608	245537
bin3_202	Peaxi162Scf00229	352361
bin3_202	Peaxi162Scf00576	498583
bin3_202	Peaxi162Scf00777	516191
bin3_202	Peaxi162Scf00238	1013968
bin3_202	Peaxi162Scf00991	381186
bin3_202	Peaxi162Scf00103	1205298
bin3_202	Peaxi162Scf00155	1224149
bin3_202	Peaxi162Scf00343	861039
bin3_202	Peaxi162Scf00431	311682
bin3_202	Peaxi162Scf00019	752403
bin3_202	Peaxi162Scf00019	817045
bin3_202	Peaxi162Scf00331	93220
bin3_202	Peaxi162Scf00871	269000
bin3_202	Peaxi162Scf00424	107769
bin3_202	Peaxi162Scf00121	2356376
bin3_202	Peaxi162Scf00049	891933
bin3_202	Peaxi162Scf00019	1050346
bin3_202	Peaxi162Scf01089	59902
bin3_202	Peaxi162Scf00901	378731
bin3_202	Peaxi162Scf00777	513570
bin3_202	Peaxi162Scf00019	1608971
bin3_202	Peaxi162Scf00519	400397
bin3_202	Peaxi162Scf00370	807176
bin3_202	Peaxi162Scf00245	537786
bin3_202	Peaxi162Scf00871	300320
bin3_202	Peaxi162Scf00164	326434
bin3_202	Peaxi162Scf01089	15815
bin3_202	Peaxi162Scf00044	1709219
bin3_202	Peaxi162Scf00331	1099137
bin3_202	Peaxi162Scf00245	537804
bin3_202	Peaxi162Scf00044	1108408
bin3_202	Peaxi162Scf01270	21508
bin3_202	Peaxi162Scf00080	527802
bin3_202	Peaxi162Scf00248	1438718
bin3_202	Peaxi162Scf00888	618522
bin3_202	Peaxi162Scf00563	384488
bin3_202	Peaxi162Scf00790	61345
bin3_202	Peaxi162Scf00156	1240603
bin3_202	Peaxi162Scf00563	384485
bin3_202	Peaxi162Scf00580	455840
bin3_202	Peaxi162Scf00629	386694
bin3_202	Peaxi162Scf01079	174716
bin3_202	Peaxi162Scf00015	1628895
bin3_202	Peaxi162Scf00353	321365
bin3_202	Peaxi162Scf00155	1029081
bin3_202	Peaxi162Scf00307	1280617
bin3_202	Peaxi162Scf00059	661243
bin3_202	Peaxi162Scf00167	412934
bin3_202	Peaxi162Scf00044	1224044
bin3_202	Peaxi162Scf00049	891975
bin3_202	Peaxi162Scf00198	1362126
bin3_202	Peaxi162Scf00059	257265
bin3_202	Peaxi162Scf00011	2691445
bin3_202	Peaxi162Scf00692	278555
bin3_202	Peaxi162Scf00871	410099
bin3_202	Peaxi162Scf00102	85867
bin3_202	Peaxi162Scf00933	286007
bin3_202	Peaxi162Scf00957	230528
bin3_202	Peaxi162Scf00331	540098
bin3_202	Peaxi162Scf01149	312887
bin3_202	Peaxi162Scf00121	2356390
bin3_202	Peaxi162Scf00019	1608979
bin3_202	Peaxi162Scf00124	1122920
bin3_202	Peaxi162Scf00015	1374436
bin3_202	Peaxi162Scf00353	598603
bin3_202	Peaxi162Scf00307	988743
bin3_202	Peaxi162Scf00573	154506
bin3_202	Peaxi162Scf00871	397175
bin3_202	Peaxi162Scf00092	1573099
bin3_202	Peaxi162Scf00080	1328174
bin3_202	Peaxi162Scf00080	1219531
bin3_202	Peaxi162Scf00914	535981
bin3_202	Peaxi162Scf00830	224810
bin3_202	Peaxi162Scf00666	509558
bin3_202	Peaxi162Scf00608	309182
bin3_202	Peaxi162Scf00015	1530691
bin3_202	Peaxi162Scf00233	1169124
bin3_202	Peaxi162Scf00181	1043722
bin3_202	Peaxi162Scf00167	954401
bin3_202	Peaxi162Scf00331	920554
bin3_202	Peaxi162Scf00903	231773
bin3_202	Peaxi162Scf01089	59864
bin3_202	Peaxi162Scf00333	250757
bin3_202	Peaxi162Scf00269	483929
bin3_202	Peaxi162Scf00121	2356420
bin3_202	Peaxi162Scf00519	768548
bin3_202	Peaxi162Scf01479	47364
bin3_202	Peaxi162Scf01125	321093
bin3_202	Peaxi162Scf01079	174679
bin3_202	Peaxi162Scf00248	240505
bin3_202	Peaxi162Scf00008	1996398
bin3_202	Peaxi162Scf00777	504384
bin3_202	Peaxi162Scf00206	1041605
bin3_202	Peaxi162Scf00121	2356351
bin3_202	Peaxi162Scf01089	15841
bin3_202	Peaxi162Scf00353	133660
bin3_202	Peaxi162Scf00206	303465
bin3_202	Peaxi162Scf01089	59927
bin3_202	Peaxi162Scf00294	860555
bin3_202	Peaxi162Scf00573	154505
bin3_202	Peaxi162Scf00710	348975
bin3_202	Peaxi162Scf00113	1838597
bin3_202	Peaxi162Scf00006	2558464
bin3_202	Peaxi162Scf00307	413972
bin3_202	Peaxi162Scf00198	1087080
bin3_202	Peaxi162Scf00233	1169126
bin3_202	Peaxi162Scf00519	644798
bin3_202	Peaxi162Scf00871	241290
bin3_202	Peaxi162Scf00871	268999
bin3_202	Peaxi162Scf00917	651118
bin3_202	Peaxi162Scf00777	516220
bin3_202	Peaxi162Scf00943	491004
bin3_202	Peaxi162Scf00307	169964
bin3_202	Peaxi162Scf00777	504457
bin3_202	Peaxi162Scf00530	26146
bin3_202	Peaxi162Scf00202	221815
bin3_202	Peaxi162Scf00248	191580
bin3_202	Peaxi162Scf00368	14795
bin3_202	Peaxi162Scf00331	93228
bin3_202	Peaxi162Scf00490	55462
bin3_202	Peaxi162Scf00124	1122956
bin3_202	Peaxi162Scf00167	721207
bin3_202	Peaxi162Scf00294	617673
bin3_202	Peaxi162Scf00001	5758146
bin3_202	Peaxi162Scf00443	760518
bin3_202	Peaxi162Scf00015	1400172
bin3_202	Peaxi162Scf00015	1124388
bin3_202	Peaxi162Scf00149	1355514
bin3_202	Peaxi162Scf00080	1400338
bin3_202	Peaxi162Scf00443	166626
bin3_202	Peaxi162Scf00238	1014000
bin3_202	Peaxi162Scf00903	231784
bin3_202	Peaxi162Scf00124	356208
bin3_202	Peaxi162Scf00113	1547847
bin3_202	Peaxi162Scf00710	252625
bin3_202	Peaxi162Scf00269	1114970
bin3_202	Peaxi162Scf00229	887501
bin3_202	Peaxi162Scf00307	988744
bin3_202	Peaxi162Scf00871	46242
bin3_202	Peaxi162Scf00966	203649
bin3_202	Peaxi162Scf01125	302814
bin3_202	Peaxi162Scf00206	431594
bin3_202	Peaxi162Scf00349	963441
bin3_202	Peaxi162Scf00295	495570
bin3_202	Peaxi162Scf00692	609978
bin3_202	Peaxi162Scf00121	2356413
bin3_202	Peaxi162Scf00011	2934904
bin3_202	Peaxi162Scf00164	1097136
bin3_202	Peaxi162Scf00019	1529969
bin3_202	Peaxi162Scf00035	2246032
bin3_202	Peaxi162Scf00087	993177
bin3_202	Peaxi162Scf00124	651838
bin3_202	Peaxi162Scf00331	93238
bin3_202	Peaxi162Scf01079	174738
bin3_202	Peaxi162Scf00229	501795
bin3_202	Peaxi162Scf00113	1947229
bin3_202	Peaxi162Scf00439	656254
bin3_202	Peaxi162Scf00576	188050
bin3_202	Peaxi162Scf00001	5704813
bin3_202	Peaxi162Scf00957	230532
bin3_202	Peaxi162Scf00519	877242
bin3_202	Peaxi162Scf00059	124429
bin3_202	Peaxi162Scf00530	755608
bin3_202	Peaxi162Scf00368	14847
bin3_202	Peaxi162Scf00218	940112
bin3_202	Peaxi162Scf01350	39061
bin3_202	Peaxi162Scf00027	815404
bin3_202	Peaxi162Scf00113	439048
bin3_202	Peaxi162Scf00027	276388
bin3_202	Peaxi162Scf00777	513508
bin3_202	Peaxi162Scf00218	298396
bin3_202	Peaxi162Scf00167	357364
bin3_202	Peaxi162Scf00295	1057278
bin4_1	Peaxi162Scf00015	1290345
bin5_1	Peaxi162Scf00045	2325856
bin6_1	Peaxi162Scf00045	1273932
bin7_5	Peaxi162Scf00045	1435281
bin7_5	Peaxi162Scf00045	1584729
bin7_5	Peaxi162Scf00045	1630140
bin7_5	Peaxi162Scf00045	1435345
bin7_5	Peaxi162Scf00045	1435344
bin8_2	Peaxi162Scf00045	2196771
bin8_2	Peaxi162Scf00045	2196759
bin9_4	Peaxi162Scf00045	2252709
bin9_4	Peaxi162Scf00045	2252669
bin9_4	Peaxi162Scf00045	2253376
bin9_4	Peaxi162Scf00045	2252700
bin10_4	Peaxi162Scf00045	2325882
bin10_4	Peaxi162Scf00045	2325832
bin10_4	Peaxi162Scf00045	2325827
bin10_4	Peaxi162Scf00045	2325829
bin11_1	Peaxi162Scf00045	2436890
bin12_2	Peaxi162Scf00317	56615
bin12_2	Peaxi162Scf00317	56575
bin13_2	Peaxi162Scf01205	86985
bin13_2	Peaxi162Scf01205	86030
bin14_5	Peaxi162Scf00075	1599871
bin14_5	Peaxi162Scf00075	1599847
bin14_5	Peaxi162Scf00075	1599864
bin14_5	Peaxi162Scf00075	1537916
bin14_5	Peaxi162Scf00075	1599906
bin15_11	Peaxi162Scf01343	81091
bin15_11	Peaxi162Scf00071	1125794
bin15_11	Peaxi162Scf00075	1632513
bin15_11	Peaxi162Scf01343	89730
bin15_11	Peaxi162Scf00071	1003917
bin15_11	Peaxi162Scf00071	847745
bin15_11	Peaxi162Scf00071	996012
bin15_11	Peaxi162Scf00075	1632499
bin15_11	Peaxi162Scf00075	1632493
bin15_11	Peaxi162Scf00071	1003871
bin15_11	Peaxi162Scf01343	81058
bin16_7	Peaxi162Scf00071	743309
bin16_7	Peaxi162Scf00071	743356
bin16_7	Peaxi162Scf00071	755799
bin16_7	Peaxi162Scf00071	714725
bin16_7	Peaxi162Scf00071	743306
bin16_7	Peaxi162Scf00071	755821
bin16_7	Peaxi162Scf00071	714797
bin17_3	Peaxi162Scf00071	664981
bin17_3	Peaxi162Scf00071	664991
bin17_3	Peaxi162Scf00071	671002
bin18_4	Peaxi162Scf00071	627938
bin18_4	Peaxi162Scf00071	563907
bin18_4	Peaxi162Scf00071	542891
bin18_4	Peaxi162Scf00071	339012
bin19_3	Peaxi162Scf00152	1555265
bin19_3	Peaxi162Scf00152	1555262
bin19_3	Peaxi162Scf00152	1555261
bin20_2	Peaxi162Scf00152	1463949
bin20_2	Peaxi162Scf00152	1498487
bin21_3	Peaxi162Scf00152	975945
bin21_3	Peaxi162Scf00152	975905
bin21_3	Peaxi162Scf00152	975943
bin22_3	Peaxi162Scf00152	863635
bin22_3	Peaxi162Scf00152	859883
bin22_3	Peaxi162Scf00152	863701
bin23_1	Peaxi162Scf00152	57516
bin24_2	Peaxi162Scf00684	582071
bin24_2	Peaxi162Scf00684	582122
bin25_3	Peaxi162Scf00078	1315431
bin25_3	Peaxi162Scf00078	1232669
bin25_3	Peaxi162Scf00684	28933
bin26_3	Peaxi162Scf00078	581686
bin26_3	Peaxi162Scf00078	533713
bin26_3	Peaxi162Scf00078	1093031
bin27_2	Peaxi162Scf00078	429597
bin27_2	Peaxi162Scf00078	436111
bin28_3	Peaxi162Scf00078	222206
bin28_3	Peaxi162Scf00688	200607
bin28_3	Peaxi162Scf00078	222223
bin29_10	Peaxi162Scf00688	356736
bin29_10	Peaxi162Scf00688	356812
bin29_10	Peaxi162Scf00688	419822
bin29_10	Peaxi162Scf00688	422111
bin29_10	Peaxi162Scf00688	422110
bin29_10	Peaxi162Scf00688	422102
bin29_10	Peaxi162Scf00688	425821
bin29_10	Peaxi162Scf00688	404389
bin29_10	Peaxi162Scf00688	425864
bin29_10	Peaxi162Scf00688	419773
bin30_1	Peaxi162Scf00111	436877
bin31_10	Peaxi162Scf00111	831411
bin31_10	Peaxi162Scf00111	764929
bin31_10	Peaxi162Scf00688	419760
bin31_10	Peaxi162Scf00111	831360
bin31_10	Peaxi162Scf00111	831368
bin31_10	Peaxi162Scf00111	832339
bin31_10	Peaxi162Scf00111	831365
bin31_10	Peaxi162Scf00111	605586
bin31_10	Peaxi162Scf00111	832304
bin31_10	Peaxi162Scf00111	832308
bin32_1	Peaxi162Scf00111	1345142
bin33_4	Peaxi162Scf00111	1429523
bin33_4	Peaxi162Scf00111	1430309
bin33_4	Peaxi162Scf00111	1223138
bin33_4	Peaxi162Scf00111	1359168
bin34_7	Peaxi162Scf00998	81534
bin34_7	Peaxi162Scf00111	1223147
bin34_7	Peaxi162Scf00111	1250995
bin34_7	Peaxi162Scf00111	1353721
bin34_7	Peaxi162Scf00069	1354401
bin34_7	Peaxi162Scf00111	1223160
bin34_7	Peaxi162Scf00998	81564
bin35_5	Peaxi162Scf00069	2091165
bin35_5	Peaxi162Scf00069	2129851
bin35_5	Peaxi162Scf00069	2105425
bin35_5	Peaxi162Scf00069	2129880
bin35_5	Peaxi162Scf00069	2091179
bin36_8	Peaxi162Scf00069	1773706
bin36_8	Peaxi162Scf01111	54922
bin36_8	Peaxi162Scf00998	81561
bin36_8	Peaxi162Scf01216	36582
bin36_8	Peaxi162Scf00111	1251077
bin36_8	Peaxi162Scf00069	1763989
bin36_8	Peaxi162Scf01216	10442
bin36_8	Peaxi162Scf00111	1529321
bin37_2	Peaxi162Scf01216	137016
bin37_2	Peaxi162Scf01216	137041
bin38_3	Peaxi162Scf01086	18618
bin38_3	Peaxi162Scf01574	12162
bin38_3	Peaxi162Scf01574	10176
bin39_7	Peaxi162Scf00450	854943
bin39_7	Peaxi162Scf01086	66187
bin39_7	Peaxi162Scf01086	66195
bin39_7	Peaxi162Scf01086	66213
bin39_7	Peaxi162Scf01086	241362
bin39_7	Peaxi162Scf01086	231005
bin39_7	Peaxi162Scf01086	66164
bin40_5	Peaxi162Scf00450	908253
bin40_5	Peaxi162Scf00450	854941
bin40_5	Peaxi162Scf00450	915571
bin40_5	Peaxi162Scf00235	339434
bin40_5	Peaxi162Scf00450	842119
bin41_3	Peaxi162Scf00612	163262
bin41_3	Peaxi162Scf00450	840845
bin41_3	Peaxi162Scf00450	840809
bin42_5	Peaxi162Scf00235	897273
bin42_5	Peaxi162Scf00235	903835
bin42_5	Peaxi162Scf00235	544829
bin42_5	Peaxi162Scf00235	821320
bin42_5	Peaxi162Scf00235	903841
bin43_2	Peaxi162Scf00285	865160
bin43_2	Peaxi162Scf00285	865171
bin44_4	Peaxi162Scf00776	27609
bin44_4	Peaxi162Scf00007	1230149
bin44_4	Peaxi162Scf00040	3013200
bin44_4	Peaxi162Scf00802	213592
bin45_9	Peaxi162Scf00921	150617
bin45_9	Peaxi162Scf00776	27587
bin45_9	Peaxi162Scf00040	3013160
bin45_9	Peaxi162Scf00921	150620
bin45_9	Peaxi162Scf00776	27617
bin45_9	Peaxi162Scf00007	295669
bin45_9	Peaxi162Scf00921	150605
bin45_9	Peaxi162Scf00776	27599
bin45_9	Peaxi162Scf00007	965180
bin46_13	Peaxi162Scf00007	2890924
bin46_13	Peaxi162Scf00132	753407
bin46_13	Peaxi162Scf00040	3013227
bin46_13	Peaxi162Scf00189	197999
bin46_13	Peaxi162Scf00132	34160
bin46_13	Peaxi162Scf00007	1638574
bin46_13	Peaxi162Scf00132	688519
bin46_13	Peaxi162Scf00189	197988
bin46_13	Peaxi162Scf00981	486572
bin46_13	Peaxi162Scf00007	1638268
bin46_13	Peaxi162Scf00007	1638628
bin46_13	Peaxi162Scf00132	756267
bin46_13	Peaxi162Scf00132	507360
bin47_11	Peaxi162Scf00132	121111
bin47_11	Peaxi162Scf00469	138421
bin47_11	Peaxi162Scf00189	198018
bin47_11	Peaxi162Scf00132	31370
bin47_11	Peaxi162Scf00132	31317
bin47_11	Peaxi162Scf00007	1638283
bin47_11	Peaxi162Scf00007	1638282
bin47_11	Peaxi162Scf00845	118963
bin47_11	Peaxi162Scf00189	197993
bin47_11	Peaxi162Scf00469	59989
bin47_11	Peaxi162Scf00132	31391
bin48_10	Peaxi162Scf00845	218354
bin48_10	Peaxi162Scf00189	198013
bin48_10	Peaxi162Scf00040	3013228
bin48_10	Peaxi162Scf00040	3013219
bin48_10	Peaxi162Scf00469	59952
bin48_10	Peaxi162Scf00132	756252
bin48_10	Peaxi162Scf00004	2466437
bin48_10	Peaxi162Scf00189	55922
bin48_10	Peaxi162Scf00040	3013170
bin48_10	Peaxi162Scf00845	436852
bin49_8	Peaxi162Scf00469	679328
bin49_8	Peaxi162Scf00469	531466
bin49_8	Peaxi162Scf01415	8330
bin49_8	Peaxi162Scf00469	138441
bin49_8	Peaxi162Scf00040	3013234
bin49_8	Peaxi162Scf00845	224912
bin49_8	Peaxi162Scf00132	456191
bin49_8	Peaxi162Scf00469	674000
bin50_8	Peaxi162Scf00391	779779
bin50_8	Peaxi162Scf00154	746871
bin50_8	Peaxi162Scf00154	166316
bin50_8	Peaxi162Scf00320	335395
bin50_8	Peaxi162Scf01013	188176
bin50_8	Peaxi162Scf00181	71462
bin50_8	Peaxi162Scf00154	166293
bin50_8	Peaxi162Scf00469	854349
bin51_9	Peaxi162Scf00560	795231
bin51_9	Peaxi162Scf00154	166321
bin51_9	Peaxi162Scf00391	535497
bin51_9	Peaxi162Scf00391	829579
bin51_9	Peaxi162Scf00231	537619
bin51_9	Peaxi162Scf00231	537623
bin51_9	Peaxi162Scf00320	72324
bin51_9	Peaxi162Scf00452	837227
bin51_9	Peaxi162Scf00391	510747
bin52_48	Peaxi162Scf00252	177959
bin52_48	Peaxi162Scf00164	1097188
bin52_48	Peaxi162Scf00232	1153813
bin52_48	Peaxi162Scf00452	370715
bin52_48	Peaxi162Scf00320	233428
bin52_48	Peaxi162Scf00457	193317
bin52_48	Peaxi162Scf00232	611782
bin52_48	Peaxi162Scf01566	22633
bin52_48	Peaxi162Scf01838	62162
bin52_48	Peaxi162Scf00320	137417
bin52_48	Peaxi162Scf01838	62170
bin52_48	Peaxi162Scf01313	301665
bin52_48	Peaxi162Scf00231	1291124
bin52_48	Peaxi162Scf00452	938168
bin52_48	Peaxi162Scf00452	736198
bin52_48	Peaxi162Scf00320	72351
bin52_48	Peaxi162Scf00088	1151470
bin52_48	Peaxi162Scf00238	1013936
bin52_48	Peaxi162Scf00457	195248
bin52_48	Peaxi162Scf00452	350297
bin52_48	Peaxi162Scf00087	1967049
bin52_48	Peaxi162Scf00452	736187
bin52_48	Peaxi162Scf00038	647722
bin52_48	Peaxi162Scf00232	720139
bin52_48	Peaxi162Scf00046	209701
bin52_48	Peaxi162Scf00452	938150
bin52_48	Peaxi162Scf01566	89943
bin52_48	Peaxi162Scf00452	938162
bin52_48	Peaxi162Scf00320	187473
bin52_48	Peaxi162Scf00452	370783
bin52_48	Peaxi162Scf00088	668780
bin52_48	Peaxi162Scf00452	350287
bin52_48	Peaxi162Scf00452	287872
bin52_48	Peaxi162Scf00320	187494
bin52_48	Peaxi162Scf00530	218563
bin52_48	Peaxi162Scf00465	588208
bin52_48	Peaxi162Scf00088	1378087
bin52_48	Peaxi162Scf00046	209763
bin52_48	Peaxi162Scf00320	4244
bin52_48	Peaxi162Scf00324	298608
bin52_48	Peaxi162Scf00452	370737
bin52_48	Peaxi162Scf00343	995120
bin52_48	Peaxi162Scf00324	688606
bin52_48	Peaxi162Scf01838	57919
bin52_48	Peaxi162Scf00452	938166
bin52_48	Peaxi162Scf00452	647695
bin52_48	Peaxi162Scf00452	938167
bin52_48	Peaxi162Scf00942	72701
bin53_107	Peaxi162Scf00423	762458
bin53_107	Peaxi162Scf00088	1416785
bin53_107	Peaxi162Scf00191	1394406
bin53_107	Peaxi162Scf00248	191617
bin53_107	Peaxi162Scf00666	268048
bin53_107	Peaxi162Scf00154	185054
bin53_107	Peaxi162Scf00038	711730
bin53_107	Peaxi162Scf00046	209764
bin53_107	Peaxi162Scf00232	95968
bin53_107	Peaxi162Scf00608	707202
bin53_107	Peaxi162Scf00176	1524995
bin53_107	Peaxi162Scf00959	95223
bin53_107	Peaxi162Scf01164	251062
bin53_107	Peaxi162Scf00888	154633
bin53_107	Peaxi162Scf00038	266409
bin53_107	Peaxi162Scf00167	954368
bin53_107	Peaxi162Scf00088	1151480
bin53_107	Peaxi162Scf00164	509033
bin53_107	Peaxi162Scf00156	137767
bin53_107	Peaxi162Scf00139	1022690
bin53_107	Peaxi162Scf00139	1022748
bin53_107	Peaxi162Scf01347	144278
bin53_107	Peaxi162Scf00716	614955
bin53_107	Peaxi162Scf00324	833019
bin53_107	Peaxi162Scf00121	1044096
bin53_107	Peaxi162Scf00359	312802
bin53_107	Peaxi162Scf00027	381437
bin53_107	Peaxi162Scf00006	5118572
bin53_107	Peaxi162Scf00232	143015
bin53_107	Peaxi162Scf01164	55613
bin53_107	Peaxi162Scf00088	1378073
bin53_107	Peaxi162Scf00519	532243
bin53_107	Peaxi162Scf01566	94147
bin53_107	Peaxi162Scf01526	49184
bin53_107	Peaxi162Scf00347	721920
bin53_107	Peaxi162Scf00088	668832
bin53_107	Peaxi162Scf00046	209702
bin53_107	Peaxi162Scf00015	1509868
bin53_107	Peaxi162Scf00407	282383
bin53_107	Peaxi162Scf00560	462148
bin53_107	Peaxi162Scf00164	1237065
bin53_107	Peaxi162Scf00959	95271
bin53_107	Peaxi162Scf00424	179591
bin53_107	Peaxi162Scf00015	1286780
bin53_107	Peaxi162Scf00027	438236
bin53_107	Peaxi162Scf00027	438267
bin53_107	Peaxi162Scf00038	266421
bin53_107	Peaxi162Scf00027	381461
bin53_107	Peaxi162Scf00424	370562
bin53_107	Peaxi162Scf00331	913876
bin53_107	Peaxi162Scf00191	1249750
bin53_107	Peaxi162Scf00627	503666
bin53_107	Peaxi162Scf00393	573315
bin53_107	Peaxi162Scf00351	650852
bin53_107	Peaxi162Scf00218	294330
bin53_107	Peaxi162Scf01347	100471
bin53_107	Peaxi162Scf00232	92544
bin53_107	Peaxi162Scf00359	707743
bin53_107	Peaxi162Scf00934	271826
bin53_107	Peaxi162Scf00393	757570
bin53_107	Peaxi162Scf00191	1394468
bin53_107	Peaxi162Scf00950	468374
bin53_107	Peaxi162Scf00777	391934
bin53_107	Peaxi162Scf00156	137795
bin53_107	Peaxi162Scf00191	1394413
bin53_107	Peaxi162Scf00038	266370
bin53_107	Peaxi162Scf00359	901127
bin53_107	Peaxi162Scf01164	251039
bin53_107	Peaxi162Scf00716	368194
bin53_107	Peaxi162Scf00206	431600
bin53_107	Peaxi162Scf00046	878785
bin53_107	Peaxi162Scf00232	92598
bin53_107	Peaxi162Scf00232	95984
bin53_107	Peaxi162Scf01164	177765
bin53_107	Peaxi162Scf00423	808587
bin53_107	Peaxi162Scf00088	668782
bin53_107	Peaxi162Scf00038	647789
bin53_107	Peaxi162Scf00046	209715
bin53_107	Peaxi162Scf00218	587378
bin53_107	Peaxi162Scf00347	773697
bin53_107	Peaxi162Scf00234	15549
bin53_107	Peaxi162Scf00939	209623
bin53_107	Peaxi162Scf00678	127921
bin53_107	Peaxi162Scf00218	831299
bin53_107	Peaxi162Scf00991	176110
bin53_107	Peaxi162Scf00799	216827
bin53_107	Peaxi162Scf00457	199717
bin53_107	Peaxi162Scf00027	1742549
bin53_107	Peaxi162Scf00351	650885
bin53_107	Peaxi162Scf00490	98346
bin53_107	Peaxi162Scf00046	209723
bin53_107	Peaxi162Scf00351	650846
bin53_107	Peaxi162Scf00164	1210810
bin53_107	Peaxi162Scf00206	973052
bin53_107	Peaxi162Scf00139	1235588
bin53_107	Peaxi162Scf00164	1166421
bin53_107	Peaxi162Scf00347	1006767
bin53_107	Peaxi162Scf00371	1052088
bin53_107	Peaxi162Scf01270	9453
bin53_107	Peaxi162Scf00088	1151418
bin53_107	Peaxi162Scf00347	259807
bin53_107	Peaxi162Scf00423	762467
bin53_107	Peaxi162Scf00027	2227963
bin53_107	Peaxi162Scf00232	505277
bin53_107	Peaxi162Scf00959	470283
bin53_107	Peaxi162Scf00046	55376
bin53_107	Peaxi162Scf00324	833021
bin54_152	Peaxi162Scf00019	1530008
bin54_152	Peaxi162Scf00666	268059
bin54_152	Peaxi162Scf00218	904918
bin54_152	Peaxi162Scf00232	334509
bin54_152	Peaxi162Scf00519	396298
bin54_152	Peaxi162Scf00580	311450
bin54_152	Peaxi162Scf00307	640935
bin54_152	Peaxi162Scf00385	1571772
bin54_152	Peaxi162Scf00267	1052966
bin54_152	Peaxi162Scf00059	124497
bin54_152	Peaxi162Scf00834	104826
bin54_152	Peaxi162Scf00154	185074
bin54_152	Peaxi162Scf02748	48149
bin54_152	Peaxi162Scf00353	124942
bin54_152	Peaxi162Scf00102	192875
bin54_152	Peaxi162Scf00424	36275
bin54_152	Peaxi162Scf00610	460907
bin54_152	Peaxi162Scf00443	473636
bin54_152	Peaxi162Scf00081	110861
bin54_152	Peaxi162Scf00044	1702049
bin54_152	Peaxi162Scf00031	1206707
bin54_152	Peaxi162Scf00027	2519613
bin54_152	Peaxi162Scf00950	625154
bin54_152	Peaxi162Scf00678	127931
bin54_152	Peaxi162Scf00218	1108408
bin54_152	Peaxi162Scf00367	50502
bin54_152	Peaxi162Scf00027	407604
bin54_152	Peaxi162Scf00164	1170991
bin54_152	Peaxi162Scf00238	1013978
bin54_152	Peaxi162Scf00610	349111
bin54_152	Peaxi162Scf00156	1240622
bin54_152	Peaxi162Scf00218	1108461
bin54_152	Peaxi162Scf00565	301337
bin54_152	Peaxi162Scf00035	2110668
bin54_152	Peaxi162Scf00871	281749
bin54_152	Peaxi162Scf00530	676602
bin54_152	Peaxi162Scf00950	625276
bin54_152	Peaxi162Scf00019	384313
bin54_152	Peaxi162Scf00206	303431
bin54_152	Peaxi162Scf00927	223978
bin54_152	Peaxi162Scf00156	79323
bin54_152	Peaxi162Scf00080	888805
bin54_152	Peaxi162Scf00950	625315
bin54_152	Peaxi162Scf00294	617674
bin54_152	Peaxi162Scf00087	1967047
bin54_152	Peaxi162Scf00011	3435061
bin54_152	Peaxi162Scf00331	1099104
bin54_152	Peaxi162Scf00103	2264078
bin54_152	Peaxi162Scf00080	888788
bin54_152	Peaxi162Scf00176	1525034
bin54_152	Peaxi162Scf00257	1659604
bin54_152	Peaxi162Scf00666	509569
bin54_152	Peaxi162Scf00519	396300
bin54_152	Peaxi162Scf00257	1366215
bin54_152	Peaxi162Scf03709	12715
bin54_152	Peaxi162Scf00576	498640
bin54_152	Peaxi162Scf01038	222901
bin54_152	Peaxi162Scf00113	409299
bin54_152	Peaxi162Scf00081	503897
bin54_152	Peaxi162Scf00121	2356422
bin54_152	Peaxi162Scf00004	31827
bin54_152	Peaxi162Scf00102	85836
bin54_152	Peaxi162Scf00018	98021
bin54_152	Peaxi162Scf01149	221202
bin54_152	Peaxi162Scf00088	1196941
bin54_152	Peaxi162Scf00245	575834
bin54_152	Peaxi162Scf00241	755168
bin54_152	Peaxi162Scf00269	202068
bin54_152	Peaxi162Scf00121	1291317
bin54_152	Peaxi162Scf00206	973054
bin54_152	Peaxi162Scf00011	3056935
bin54_152	Peaxi162Scf00181	330854
bin54_152	Peaxi162Scf00019	1507574
bin54_152	Peaxi162Scf00113	439042
bin54_152	Peaxi162Scf00011	3294108
bin54_152	Peaxi162Scf00519	400412
bin54_152	Peaxi162Scf00424	36237
bin54_152	Peaxi162Scf00019	384315
bin54_152	Peaxi162Scf00218	587413
bin54_152	Peaxi162Scf00401	629816
bin54_152	Peaxi162Scf00950	389681
bin54_152	Peaxi162Scf00015	2057009
bin54_152	Peaxi162Scf00431	655272
bin54_152	Peaxi162Scf00008	1922215
bin54_152	Peaxi162Scf00164	1171015
bin54_152	Peaxi162Scf00176	1501222
bin54_152	Peaxi162Scf00011	3354634
bin54_152	Peaxi162Scf00248	53336
bin54_152	Peaxi162Scf00950	643397
bin54_152	Peaxi162Scf00530	45187
bin54_152	Peaxi162Scf00139	1147248
bin54_152	Peaxi162Scf00008	1922208
bin54_152	Peaxi162Scf00103	2236711
bin54_152	Peaxi162Scf00833	517218
bin54_152	Peaxi162Scf00248	53337
bin54_152	Peaxi162Scf00490	55415
bin54_152	Peaxi162Scf00198	866821
bin54_152	Peaxi162Scf00401	660783
bin54_152	Peaxi162Scf00081	503861
bin54_152	Peaxi162Scf00307	1076345
bin54_152	Peaxi162Scf00015	2203456
bin54_152	Peaxi162Scf00102	192845
bin54_152	Peaxi162Scf00218	587389
bin54_152	Peaxi162Scf00081	388725
bin54_152	Peaxi162Scf00238	582325
bin54_152	Peaxi162Scf00198	1362094
bin54_152	Peaxi162Scf00231	928046
bin54_152	Peaxi162Scf00218	904931
bin54_152	Peaxi162Scf00218	684526
bin54_152	Peaxi162Scf00206	972984
bin54_152	Peaxi162Scf00164	1237002
bin54_152	Peaxi162Scf00059	1050501
bin54_152	Peaxi162Scf00530	755599
bin54_152	Peaxi162Scf00202	152847
bin54_152	Peaxi162Scf00167	954403
bin54_152	Peaxi162Scf00080	894223
bin54_152	Peaxi162Scf01414	33107
bin54_152	Peaxi162Scf00385	1517248
bin54_152	Peaxi162Scf00004	153479
bin54_152	Peaxi162Scf00241	755144
bin54_152	Peaxi162Scf00218	662592
bin54_152	Peaxi162Scf00367	456591
bin54_152	Peaxi162Scf00102	192844
bin54_152	Peaxi162Scf00167	954366
bin54_152	Peaxi162Scf00164	1041880
bin54_152	Peaxi162Scf00019	952105
bin54_152	Peaxi162Scf00218	587390
bin54_152	Peaxi162Scf00088	1196924
bin54_152	Peaxi162Scf00888	618541
bin54_152	Peaxi162Scf00519	183682
bin54_152	Peaxi162Scf00887	335842
bin54_152	Peaxi162Scf00121	2356350
bin54_152	Peaxi162Scf00181	1041658
bin54_152	Peaxi162Scf00081	503935
bin54_152	Peaxi162Scf00530	567614
bin54_152	Peaxi162Scf00490	98358
bin54_152	Peaxi162Scf00176	1411794
bin54_152	Peaxi162Scf00403	597177
bin54_152	Peaxi162Scf00530	878879
bin54_152	Peaxi162Scf00049	1554069
bin54_152	Peaxi162Scf00015	2686740
bin54_152	Peaxi162Scf00121	1291249
bin54_152	Peaxi162Scf00103	2189149
bin54_152	Peaxi162Scf00203	1306719
bin54_152	Peaxi162Scf00331	1099148
bin54_152	Peaxi162Scf00519	396260
bin54_152	Peaxi162Scf00087	2242117
bin54_152	Peaxi162Scf00206	431566
bin54_152	Peaxi162Scf00950	389693
bin54_152	Peaxi162Scf00233	1169149
bin54_152	Peaxi162Scf00019	752389
bin54_152	Peaxi162Scf00218	1108424
bin55_14	Peaxi162Scf00139	994730
bin55_14	Peaxi162Scf00313	45922
bin55_14	Peaxi162Scf00267	16116
bin55_14	Peaxi162Scf00080	888808
bin55_14	Peaxi162Scf00393	738745
bin55_14	Peaxi162Scf00692	278536
bin55_14	Peaxi162Scf00888	426505
bin55_14	Peaxi162Scf00059	124506
bin55_14	Peaxi162Scf00059	964119
bin55_14	Peaxi162Scf00367	456547
bin55_14	Peaxi162Scf00530	148970
bin55_14	Peaxi162Scf00008	1957217
bin55_14	Peaxi162Scf00790	61364
bin55_14	Peaxi162Scf00139	994793
bin56_26	Peaxi162Scf00241	755187
bin56_26	Peaxi162Scf00015	2155711
bin56_26	Peaxi162Scf00218	904914
bin56_26	Peaxi162Scf00206	956110
bin56_26	Peaxi162Scf03709	12749
bin56_26	Peaxi162Scf00424	259750
bin56_26	Peaxi162Scf00530	755631
bin56_26	Peaxi162Scf00081	65169
bin56_26	Peaxi162Scf00004	153530
bin56_26	Peaxi162Scf00035	2412783
bin56_26	Peaxi162Scf00245	966484
bin56_26	Peaxi162Scf00530	232966
bin56_26	Peaxi162Scf00320	4201
bin56_26	Peaxi162Scf00439	795062
bin56_26	Peaxi162Scf00038	403236
bin56_26	Peaxi162Scf00666	509567
bin56_26	Peaxi162Scf00015	1352132
bin56_26	Peaxi162Scf00006	2558442
bin56_26	Peaxi162Scf00950	389678
bin56_26	Peaxi162Scf01526	49185
bin56_26	Peaxi162Scf00027	1503811
bin56_26	Peaxi162Scf00155	1224110
bin56_26	Peaxi162Scf00080	894221
bin56_26	Peaxi162Scf00081	503890
bin56_26	Peaxi162Scf00295	751206
bin56_26	Peaxi162Scf00331	79332
bin57_33	Peaxi162Scf00164	1421398
bin57_33	Peaxi162Scf00901	378784
bin57_33	Peaxi162Scf00367	16743
bin57_33	Peaxi162Scf00887	60280
bin57_33	Peaxi162Scf00046	878758
bin57_33	Peaxi162Scf00046	165904
bin57_33	Peaxi162Scf00038	655258
bin57_33	Peaxi162Scf00164	1344357
bin57_33	Peaxi162Scf00359	1201832
bin57_33	Peaxi162Scf00167	956663
bin57_33	Peaxi162Scf01347	238313
bin57_33	Peaxi162Scf00164	1514329
bin57_33	Peaxi162Scf00231	1289529
bin57_33	Peaxi162Scf00164	1421349
bin57_33	Peaxi162Scf00359	1219656
bin57_33	Peaxi162Scf00530	878916
bin57_33	Peaxi162Scf00395	343521
bin57_33	Peaxi162Scf00154	185100
bin57_33	Peaxi162Scf00917	50989
bin57_33	Peaxi162Scf00164	1514267
bin57_33	Peaxi162Scf00497	610103
bin57_33	Peaxi162Scf00403	613014
bin57_33	Peaxi162Scf01125	36608
bin57_33	Peaxi162Scf00088	773312
bin57_33	Peaxi162Scf00044	1526633
bin57_33	Peaxi162Scf00167	956632
bin57_33	Peaxi162Scf00121	1255876
bin57_33	Peaxi162Scf00833	447361
bin57_33	Peaxi162Scf00176	1525025
bin57_33	Peaxi162Scf00245	379967
bin57_33	Peaxi162Scf00102	6398
bin57_33	Peaxi162Scf00155	1029114
bin57_33	Peaxi162Scf00324	832973
bin58_12	Peaxi162Scf00248	53691
bin58_12	Peaxi162Scf00015	1331917
bin58_12	Peaxi162Scf00218	137075
bin58_12	Peaxi162Scf00121	583592
bin58_12	Peaxi162Scf00790	45339
bin58_12	Peaxi162Scf00991	362778
bin58_12	Peaxi162Scf00403	596722
bin58_12	Peaxi162Scf00046	165914
bin58_12	Peaxi162Scf00167	954349
bin58_12	Peaxi162Scf00080	1751660
bin58_12	Peaxi162Scf00956	90338
bin58_12	Peaxi162Scf00229	514915
bin59_1	Peaxi162Scf00530	520895
bin60_29	Peaxi162Scf00443	117578
bin60_29	Peaxi162Scf00019	952131
bin60_29	Peaxi162Scf00038	655225
bin60_29	Peaxi162Scf00124	737179
bin60_29	Peaxi162Scf00198	1362107
bin60_29	Peaxi162Scf00576	64765
bin60_29	Peaxi162Scf00385	1517296
bin60_29	Peaxi162Scf00059	1319261
bin60_29	Peaxi162Scf00044	1702014
bin60_29	Peaxi162Scf00080	1751675
bin60_29	Peaxi162Scf01125	315806
bin60_29	Peaxi162Scf00008	2057380
bin60_29	Peaxi162Scf00167	956684
bin60_29	Peaxi162Scf00331	546433
bin60_29	Peaxi162Scf00950	420544
bin60_29	Peaxi162Scf00046	165880
bin60_29	Peaxi162Scf00530	755588
bin60_29	Peaxi162Scf00206	956141
bin60_29	Peaxi162Scf00027	1350345
bin60_29	Peaxi162Scf00167	1223008
bin60_29	Peaxi162Scf01142	61540
bin60_29	Peaxi162Scf00925	7740
bin60_29	Peaxi162Scf00059	1678018
bin60_29	Peaxi162Scf00008	3322522
bin60_29	Peaxi162Scf00027	1786889
bin60_29	Peaxi162Scf00080	888803
bin60_29	Peaxi162Scf00156	79365
bin60_29	Peaxi162Scf00198	913475
bin60_29	Peaxi162Scf00176	1411778
bin61_3	Peaxi162Scf00324	121732
bin61_3	Peaxi162Scf00232	916523
bin61_3	Peaxi162Scf00320	21271
bin62_124	Peaxi162Scf00027	364313
bin62_124	Peaxi162Scf00666	268105
bin62_124	Peaxi162Scf00218	590127
bin62_124	Peaxi162Scf00218	298440
bin62_124	Peaxi162Scf00004	153465
bin62_124	Peaxi162Scf00218	587388
bin62_124	Peaxi162Scf00015	1209443
bin62_124	Peaxi162Scf00113	600771
bin62_124	Peaxi162Scf00167	956652
bin62_124	Peaxi162Scf00950	614185
bin62_124	Peaxi162Scf00019	1529992
bin62_124	Peaxi162Scf00088	1726670
bin62_124	Peaxi162Scf00269	704940
bin62_124	Peaxi162Scf00176	1501269
bin62_124	Peaxi162Scf00351	857040
bin62_124	Peaxi162Scf00519	396312
bin62_124	Peaxi162Scf00790	45354
bin62_124	Peaxi162Scf00008	4608134
bin62_124	Peaxi162Scf00167	956659
bin62_124	Peaxi162Scf00218	294287
bin62_124	Peaxi162Scf00103	1822864
bin62_124	Peaxi162Scf00530	878899
bin62_124	Peaxi162Scf00015	1509867
bin62_124	Peaxi162Scf00233	389372
bin62_124	Peaxi162Scf00888	426567
bin62_124	Peaxi162Scf01258	4801
bin62_124	Peaxi162Scf00267	582844
bin62_124	Peaxi162Scf00167	956673
bin62_124	Peaxi162Scf00202	332350
bin62_124	Peaxi162Scf00206	973043
bin62_124	Peaxi162Scf00093	1057896
bin62_124	Peaxi162Scf00424	370593
bin62_124	Peaxi162Scf00218	137230
bin62_124	Peaxi162Scf00027	381421
bin62_124	Peaxi162Scf00367	456541
bin62_124	Peaxi162Scf00004	153535
bin62_124	Peaxi162Scf00218	590086
bin62_124	Peaxi162Scf00380	95645
bin62_124	Peaxi162Scf00525	702015
bin62_124	Peaxi162Scf00245	1202910
bin62_124	Peaxi162Scf00371	1052107
bin62_124	Peaxi162Scf00269	574436
bin62_124	Peaxi162Scf00044	1594704
bin62_124	Peaxi162Scf00950	614123
bin62_124	Peaxi162Scf00038	655250
bin62_124	Peaxi162Scf00833	533899
bin62_124	Peaxi162Scf00004	153494
bin62_124	Peaxi162Scf00241	1264144
bin62_124	Peaxi162Scf00784	305683
bin62_124	Peaxi162Scf00202	332394
bin62_124	Peaxi162Scf00008	1740328
bin62_124	Peaxi162Scf00093	113367
bin62_124	Peaxi162Scf00027	3086815
bin62_124	Peaxi162Scf00449	46560
bin62_124	Peaxi162Scf00347	876551
bin62_124	Peaxi162Scf00164	1463470
bin62_124	Peaxi162Scf00950	468384
bin62_124	Peaxi162Scf00950	825167
bin62_124	Peaxi162Scf00343	861109
bin62_124	Peaxi162Scf00088	773315
bin62_124	Peaxi162Scf00088	1726669
bin62_124	Peaxi162Scf00241	1264131
bin62_124	Peaxi162Scf00164	1344377
bin62_124	Peaxi162Scf00666	20712
bin62_124	Peaxi162Scf00018	1631839
bin62_124	Peaxi162Scf00530	520905
bin62_124	Peaxi162Scf00234	15522
bin62_124	Peaxi162Scf00035	1669339
bin62_124	Peaxi162Scf00519	877186
bin62_124	Peaxi162Scf00181	330815
bin62_124	Peaxi162Scf00889	65136
bin62_124	Peaxi162Scf00241	1264103
bin62_124	Peaxi162Scf01125	36655
bin62_124	Peaxi162Scf00229	828161
bin62_124	Peaxi162Scf00395	343554
bin62_124	Peaxi162Scf00044	1946840
bin62_124	Peaxi162Scf00093	236216
bin62_124	Peaxi162Scf00044	1597384
bin62_124	Peaxi162Scf00206	972983
bin62_124	Peaxi162Scf00231	1289532
bin62_124	Peaxi162Scf00678	133041
bin62_124	Peaxi162Scf00371	666833
bin62_124	Peaxi162Scf00088	773259
bin62_124	Peaxi162Scf00203	1455109
bin62_124	Peaxi162Scf00608	573133
bin62_124	Peaxi162Scf00203	1236909
bin62_124	Peaxi162Scf00218	587403
bin62_124	Peaxi162Scf00046	165853
bin62_124	Peaxi162Scf73148	3213
bin62_124	Peaxi162Scf00585	883978
bin62_124	Peaxi162Scf00011	3435056
bin62_124	Peaxi162Scf00218	590100
bin62_124	Peaxi162Scf00080	1400304
bin62_124	Peaxi162Scf00027	364312
bin62_124	Peaxi162Scf01149	197641
bin62_124	Peaxi162Scf00234	15500
bin62_124	Peaxi162Scf00156	137817
bin62_124	Peaxi162Scf00610	19933
bin62_124	Peaxi162Scf00218	1364583
bin62_124	Peaxi162Scf00901	299116
bin62_124	Peaxi162Scf00218	713468
bin62_124	Peaxi162Scf00202	332371
bin62_124	Peaxi162Scf00233	389337
bin62_124	Peaxi162Scf00950	389698
bin62_124	Peaxi162Scf00490	185655
bin62_124	Peaxi162Scf00490	98356
bin62_124	Peaxi162Scf00008	1996424
bin62_124	Peaxi162Scf00088	1726688
bin62_124	Peaxi162Scf00269	891527
bin62_124	Peaxi162Scf01149	221211
bin62_124	Peaxi162Scf00019	371841
bin62_124	Peaxi162Scf00218	662563
bin62_124	Peaxi162Scf00245	860077
bin62_124	Peaxi162Scf00218	713487
bin62_124	Peaxi162Scf00790	45338
bin62_124	Peaxi162Scf00530	567675
bin62_124	Peaxi162Scf00046	570365
bin62_124	Peaxi162Scf00307	1337066
bin62_124	Peaxi162Scf00367	50438
bin62_124	Peaxi162Scf00011	2443954
bin62_124	Peaxi162Scf00087	1299739
bin62_124	Peaxi162Scf00081	110888
bin62_124	Peaxi162Scf00176	1524044
bin62_124	Peaxi162Scf00525	584422
bin63_260	Peaxi162Scf00248	1306016
bin63_260	Peaxi162Scf00353	887057
bin63_260	Peaxi162Scf00229	559798
bin63_260	Peaxi162Scf00608	317002
bin63_260	Peaxi162Scf00585	735619
bin63_260	Peaxi162Scf00830	37780
bin63_260	Peaxi162Scf00015	1804245
bin63_260	Peaxi162Scf00576	498579
bin63_260	Peaxi162Scf00019	384312
bin63_260	Peaxi162Scf00103	1822853
bin63_260	Peaxi162Scf00001	5375488
bin63_260	Peaxi162Scf00629	405489
bin63_260	Peaxi162Scf00218	590158
bin63_260	Peaxi162Scf00267	1052910
bin63_260	Peaxi162Scf00113	656790
bin63_260	Peaxi162Scf01149	31753
bin63_260	Peaxi162Scf00629	387602
bin63_260	Peaxi162Scf00167	357334
bin63_260	Peaxi162Scf00834	345825
bin63_260	Peaxi162Scf00608	664329
bin63_260	Peaxi162Scf00234	15505
bin63_260	Peaxi162Scf00198	913457
bin63_260	Peaxi162Scf00206	303440
bin63_260	Peaxi162Scf00267	16112
bin63_260	Peaxi162Scf00167	1269899
bin63_260	Peaxi162Scf00943	491030
bin63_260	Peaxi162Scf00267	753856
bin63_260	Peaxi162Scf00167	752965
bin63_260	Peaxi162Scf00049	548331
bin63_260	Peaxi162Scf00015	2781588
bin63_260	Peaxi162Scf00799	597906
bin63_260	Peaxi162Scf00155	13978
bin63_260	Peaxi162Scf00239	384562
bin63_260	Peaxi162Scf00580	311440
bin63_260	Peaxi162Scf01414	31746
bin63_260	Peaxi162Scf00001	5306792
bin63_260	Peaxi162Scf00059	661242
bin63_260	Peaxi162Scf00206	431580
bin63_260	Peaxi162Scf00888	154653
bin63_260	Peaxi162Scf00424	370542
bin63_260	Peaxi162Scf00001	6058711
bin63_260	Peaxi162Scf00019	1243300
bin63_260	Peaxi162Scf00206	266032
bin63_260	Peaxi162Scf00380	95603
bin63_260	Peaxi162Scf00580	305697
bin63_260	Peaxi162Scf00035	2857767
bin63_260	Peaxi162Scf00019	949189
bin63_260	Peaxi162Scf00710	349028
bin63_260	Peaxi162Scf00015	1628871
bin63_260	Peaxi162Scf00439	568502
bin63_260	Peaxi162Scf00155	906326
bin63_260	Peaxi162Scf00155	13903
bin63_260	Peaxi162Scf00353	887099
bin63_260	Peaxi162Scf00343	995110
bin63_260	Peaxi162Scf00777	391943
bin63_260	Peaxi162Scf00629	386656
bin63_260	Peaxi162Scf00367	456554
bin63_260	Peaxi162Scf01079	273221
bin63_260	Peaxi162Scf00353	719642
bin63_260	Peaxi162Scf00103	1822884
bin63_260	Peaxi162Scf00248	1153574
bin63_260	Peaxi162Scf00573	245959
bin63_260	Peaxi162Scf00294	860506
bin63_260	Peaxi162Scf00901	299127
bin63_260	Peaxi162Scf01270	21462
bin63_260	Peaxi162Scf00395	223073
bin63_260	Peaxi162Scf00181	1037965
bin63_260	Peaxi162Scf00925	111026
bin63_260	Peaxi162Scf00092	1701394
bin63_260	Peaxi162Scf00167	1269880
bin63_260	Peaxi162Scf00565	301320
bin63_260	Peaxi162Scf00294	1008575
bin63_260	Peaxi162Scf00888	220952
bin63_260	Peaxi162Scf00917	50946
bin63_260	Peaxi162Scf00267	142442
bin63_260	Peaxi162Scf01909	107406
bin63_260	Peaxi162Scf01079	277451
bin63_260	Peaxi162Scf00565	178354
bin63_260	Peaxi162Scf00565	301395
bin63_260	Peaxi162Scf00395	303790
bin63_260	Peaxi162Scf00439	1027349
bin63_260	Peaxi162Scf00035	1636429
bin63_260	Peaxi162Scf00080	1841724
bin63_260	Peaxi162Scf00307	1420618
bin63_260	Peaxi162Scf00576	498623
bin63_260	Peaxi162Scf00267	1052985
bin63_260	Peaxi162Scf00573	376052
bin63_260	Peaxi162Scf00368	307827
bin63_260	Peaxi162Scf00465	53078
bin63_260	Peaxi162Scf00200	24148
bin63_260	Peaxi162Scf00608	664331
bin63_260	Peaxi162Scf00901	202514
bin63_260	Peaxi162Scf00367	134115
bin63_260	Peaxi162Scf00943	491001
bin63_260	Peaxi162Scf00155	872245
bin63_260	Peaxi162Scf00155	626757
bin63_260	Peaxi162Scf00035	2639236
bin63_260	Peaxi162Scf00439	827736
bin63_260	Peaxi162Scf01482	32067
bin63_260	Peaxi162Scf00001	5758166
bin63_260	Peaxi162Scf00124	356180
bin63_260	Peaxi162Scf00155	872162
bin63_260	Peaxi162Scf00576	64748
bin63_260	Peaxi162Scf00465	728791
bin63_260	Peaxi162Scf00370	807204
bin63_260	Peaxi162Scf00331	1273040
bin63_260	Peaxi162Scf00019	1050406
bin63_260	Peaxi162Scf00999	119612
bin63_260	Peaxi162Scf00011	3078429
bin63_260	Peaxi162Scf01197	75624
bin63_260	Peaxi162Scf00294	1098664
bin63_260	Peaxi162Scf00181	470461
bin63_260	Peaxi162Scf00465	728748
bin63_260	Peaxi162Scf00294	1098647
bin63_260	Peaxi162Scf00439	568482
bin63_260	Peaxi162Scf01414	17577
bin63_260	Peaxi162Scf00576	533614
bin63_260	Peaxi162Scf00059	1456366
bin63_260	Peaxi162Scf00858	231308
bin63_260	Peaxi162Scf00943	394250
bin63_260	Peaxi162Scf00975	267828
bin63_260	Peaxi162Scf00167	122803
bin63_260	Peaxi162Scf00710	38349
bin63_260	Peaxi162Scf00519	183776
bin63_260	Peaxi162Scf00565	301394
bin63_260	Peaxi162Scf00629	340426
bin63_260	Peaxi162Scf00710	166906
bin63_260	Peaxi162Scf00167	161130
bin63_260	Peaxi162Scf00943	491061
bin63_260	Peaxi162Scf00573	326251
bin63_260	Peaxi162Scf00093	113413
bin63_260	Peaxi162Scf00439	491249
bin63_260	Peaxi162Scf00267	1052942
bin63_260	Peaxi162Scf00956	423158
bin63_260	Peaxi162Scf00449	296122
bin63_260	Peaxi162Scf00001	5669232
bin63_260	Peaxi162Scf00019	2147899
bin63_260	Peaxi162Scf00035	3195421
bin63_260	Peaxi162Scf00395	303804
bin63_260	Peaxi162Scf00917	651139
bin63_260	Peaxi162Scf00167	161171
bin63_260	Peaxi162Scf00943	134394
bin63_260	Peaxi162Scf00167	721144
bin63_260	Peaxi162Scf00367	456570
bin63_260	Peaxi162Scf01149	296101
bin63_260	Peaxi162Scf00001	5687898
bin63_260	Peaxi162Scf00439	234125
bin63_260	Peaxi162Scf00307	1337064
bin63_260	Peaxi162Scf00585	39744
bin63_260	Peaxi162Scf00449	546802
bin63_260	Peaxi162Scf00019	384314
bin63_260	Peaxi162Scf00035	2687554
bin63_260	Peaxi162Scf00294	187380
bin63_260	Peaxi162Scf00565	301347
bin63_260	Peaxi162Scf00234	15530
bin63_260	Peaxi162Scf00245	575810
bin63_260	Peaxi162Scf00087	1756105
bin63_260	Peaxi162Scf00790	263064
bin63_260	Peaxi162Scf00229	248870
bin63_260	Peaxi162Scf00248	53306
bin63_260	Peaxi162Scf00008	2876020
bin63_260	Peaxi162Scf00015	1679549
bin63_260	Peaxi162Scf00019	952096
bin63_260	Peaxi162Scf00294	1098680
bin63_260	Peaxi162Scf00234	15558
bin63_260	Peaxi162Scf00164	1340281
bin63_260	Peaxi162Scf00044	1234070
bin63_260	Peaxi162Scf00307	1479818
bin63_260	Peaxi162Scf00019	547086
bin63_260	Peaxi162Scf00790	289883
bin63_260	Peaxi162Scf01445	53597
bin63_260	Peaxi162Scf00465	728727
bin63_260	Peaxi162Scf00294	1010957
bin63_260	Peaxi162Scf00449	546772
bin63_260	Peaxi162Scf00465	728767
bin63_260	Peaxi162Scf00001	5704745
bin63_260	Peaxi162Scf00080	1841689
bin63_260	Peaxi162Scf00121	484405
bin63_260	Peaxi162Scf00155	582359
bin63_260	Peaxi162Scf00008	3596364
bin63_260	Peaxi162Scf00015	2064861
bin63_260	Peaxi162Scf00238	615092
bin63_260	Peaxi162Scf01258	4800
bin63_260	Peaxi162Scf00019	1243320
bin63_260	Peaxi162Scf00080	1368509
bin63_260	Peaxi162Scf00015	1124424
bin63_260	Peaxi162Scf00167	357353
bin63_260	Peaxi162Scf00044	1702027
bin63_260	Peaxi162Scf00113	1838574
bin63_260	Peaxi162Scf00465	728726
bin63_260	Peaxi162Scf00167	708854
bin63_260	Peaxi162Scf00155	1224138
bin63_260	Peaxi162Scf00015	1124374
bin63_260	Peaxi162Scf00167	1269893
bin63_260	Peaxi162Scf00395	303805
bin63_260	Peaxi162Scf00799	597904
bin63_260	Peaxi162Scf00155	906367
bin63_260	Peaxi162Scf00035	2687569
bin63_260	Peaxi162Scf00198	1464089
bin63_260	Peaxi162Scf00156	732364
bin63_260	Peaxi162Scf00790	174233
bin63_260	Peaxi162Scf00008	4038043
bin63_260	Peaxi162Scf00943	394243
bin63_260	Peaxi162Scf00019	1243373
bin63_260	Peaxi162Scf00087	1756115
bin63_260	Peaxi162Scf00353	887083
bin63_260	Peaxi162Scf00608	214917
bin63_260	Peaxi162Scf01414	17590
bin63_260	Peaxi162Scf00035	2639267
bin63_260	Peaxi162Scf02748	7484
bin63_260	Peaxi162Scf00881	218167
bin63_260	Peaxi162Scf00257	991636
bin63_260	Peaxi162Scf00049	548274
bin63_260	Peaxi162Scf00198	1362060
bin63_260	Peaxi162Scf00395	223082
bin63_260	Peaxi162Scf00015	2781566
bin63_260	Peaxi162Scf00015	1195025
bin63_260	Peaxi162Scf00917	651093
bin63_260	Peaxi162Scf00229	501751
bin63_260	Peaxi162Scf00331	1273052
bin63_260	Peaxi162Scf00206	462975
bin63_260	Peaxi162Scf00608	817105
bin63_260	Peaxi162Scf00608	664330
bin63_260	Peaxi162Scf00580	24461
bin63_260	Peaxi162Scf01125	36682
bin63_260	Peaxi162Scf00269	471779
bin63_260	Peaxi162Scf00035	1427964
bin63_260	Peaxi162Scf00167	1269881
bin63_260	Peaxi162Scf00956	486375
bin63_260	Peaxi162Scf00576	64737
bin63_260	Peaxi162Scf00031	970074
bin63_260	Peaxi162Scf00044	1594648
bin63_260	Peaxi162Scf00439	656193
bin63_260	Peaxi162Scf00008	4038023
bin63_260	Peaxi162Scf00395	303856
bin63_260	Peaxi162Scf00629	386682
bin63_260	Peaxi162Scf00395	223129
bin63_260	Peaxi162Scf00049	548321
bin63_260	Peaxi162Scf00008	4198709
bin63_260	Peaxi162Scf00799	597905
bin63_260	Peaxi162Scf00465	53102
bin63_260	Peaxi162Scf00777	513538
bin63_260	Peaxi162Scf00573	245898
bin63_260	Peaxi162Scf00313	258082
bin63_260	Peaxi162Scf00692	278587
bin63_260	Peaxi162Scf00353	598591
bin63_260	Peaxi162Scf00269	126633
bin63_260	Peaxi162Scf00167	708824
bin63_260	Peaxi162Scf00449	453272
bin63_260	Peaxi162Scf00045	2579349
bin63_260	Peaxi162Scf00103	1822876
bin63_260	Peaxi162Scf00692	609973
bin63_260	Peaxi162Scf00155	906349
bin63_260	Peaxi162Scf00956	363391
bin63_260	Peaxi162Scf00167	357308
bin63_260	Peaxi162Scf00080	1854556
bin63_260	Peaxi162Scf00015	1509847
bin63_260	Peaxi162Scf00395	303817
bin63_260	Peaxi162Scf01175	91761
bin63_260	Peaxi162Scf00519	183778
bin64_2	Peaxi162Scf00188	913594
bin64_2	Peaxi162Scf00188	888387
bin65_2	Peaxi162Scf00175	1145561
bin65_2	Peaxi162Scf00175	1145574
bin66_3	Peaxi162Scf00175	828748
bin66_3	Peaxi162Scf00175	478095
bin66_3	Peaxi162Scf00175	478093
bin67_3	Peaxi162Scf00314	15150
bin67_3	Peaxi162Scf00314	15104
bin67_3	Peaxi162Scf00314	15128
bin68_3	Peaxi162Scf00222	119732
bin68_3	Peaxi162Scf01176	29066
bin68_3	Peaxi162Scf01176	134493
bin69_2	Peaxi162Scf00364	173643
bin69_2	Peaxi162Scf01176	134506
bin70_1	Peaxi162Scf00314	23445
bin71_9	Peaxi162Scf01176	29020
bin71_9	Peaxi162Scf00222	46894
bin71_9	Peaxi162Scf00364	173687
bin71_9	Peaxi162Scf01176	134465
bin71_9	Peaxi162Scf01176	48679
bin71_9	Peaxi162Scf00364	184189
bin71_9	Peaxi162Scf00222	46840
bin71_9	Peaxi162Scf00222	46846
bin71_9	Peaxi162Scf01176	134464
bin72_5	Peaxi162Scf00222	881129
bin72_5	Peaxi162Scf00222	145826
bin72_5	Peaxi162Scf00222	317869
bin72_5	Peaxi162Scf00222	175373
bin72_5	Peaxi162Scf00222	317804
bin73_9	Peaxi162Scf00541	432284
bin73_9	Peaxi162Scf00503	639992
bin73_9	Peaxi162Scf00541	432321
bin73_9	Peaxi162Scf00222	621955
bin73_9	Peaxi162Scf01030	32956
bin73_9	Peaxi162Scf00222	223834
bin73_9	Peaxi162Scf01030	226389
bin73_9	Peaxi162Scf01030	149014
bin73_9	Peaxi162Scf00503	639942
bin74_1	Peaxi162Scf00209	1044223
bin75_12	Peaxi162Scf00421	892517
bin75_12	Peaxi162Scf00421	527252
bin75_12	Peaxi162Scf01141	17685
bin75_12	Peaxi162Scf00421	849352
bin75_12	Peaxi162Scf00421	852136
bin75_12	Peaxi162Scf01141	146899
bin75_12	Peaxi162Scf00421	849364
bin75_12	Peaxi162Scf00421	585472
bin75_12	Peaxi162Scf00421	527279
bin75_12	Peaxi162Scf00421	849325
bin75_12	Peaxi162Scf00421	849386
bin75_12	Peaxi162Scf00421	852107
bin76_11	Peaxi162Scf01070	80939
bin76_11	Peaxi162Scf00393	37683
bin76_11	Peaxi162Scf00421	207454
bin76_11	Peaxi162Scf00380	283884
bin76_11	Peaxi162Scf00393	37673
bin76_11	Peaxi162Scf00421	207442
bin76_11	Peaxi162Scf00421	36291
bin76_11	Peaxi162Scf01070	80949
bin76_11	Peaxi162Scf00421	103272
bin76_11	Peaxi162Scf00421	207435
bin76_11	Peaxi162Scf01070	80989
bin77_20	Peaxi162Scf00014	2763616
bin77_20	Peaxi162Scf01147	204996
bin77_20	Peaxi162Scf00380	214022
bin77_20	Peaxi162Scf00382	433418
bin77_20	Peaxi162Scf00753	177650
bin77_20	Peaxi162Scf00380	283871
bin77_20	Peaxi162Scf00753	177696
bin77_20	Peaxi162Scf01147	160653
bin77_20	Peaxi162Scf00198	277114
bin77_20	Peaxi162Scf00753	201457
bin77_20	Peaxi162Scf00367	830500
bin77_20	Peaxi162Scf00014	2771861
bin77_20	Peaxi162Scf01147	154305
bin77_20	Peaxi162Scf00753	201476
bin77_20	Peaxi162Scf00380	169971
bin77_20	Peaxi162Scf00367	704067
bin77_20	Peaxi162Scf00380	698787
bin77_20	Peaxi162Scf00198	397520
bin77_20	Peaxi162Scf00112	1660137
bin77_20	Peaxi162Scf00380	219841
bin78_1	Peaxi162Scf00382	146137
bin79_7	Peaxi162Scf00380	755474
bin79_7	Peaxi162Scf00367	832408
bin79_7	Peaxi162Scf00344	1983445
bin79_7	Peaxi162Scf01147	204967
bin79_7	Peaxi162Scf00124	1335993
bin79_7	Peaxi162Scf00382	433393
bin79_7	Peaxi162Scf00198	505481
bin80_3	Peaxi162Scf00355	801062
bin80_3	Peaxi162Scf01021	372644
bin80_3	Peaxi162Scf01021	372631
bin81_41	Peaxi162Scf00717	63176
bin81_41	Peaxi162Scf00329	638653
bin81_41	Peaxi162Scf00112	500020
bin81_41	Peaxi162Scf00021	1840148
bin81_41	Peaxi162Scf00254	775099
bin81_41	Peaxi162Scf00202	420954
bin81_41	Peaxi162Scf00202	1501701
bin81_41	Peaxi162Scf00261	254523
bin81_41	Peaxi162Scf00787	101443
bin81_41	Peaxi162Scf00244	601994
bin81_41	Peaxi162Scf00827	393912
bin81_41	Peaxi162Scf00026	2502232
bin81_41	Peaxi162Scf00329	638616
bin81_41	Peaxi162Scf00954	419890
bin81_41	Peaxi162Scf00112	1660109
bin81_41	Peaxi162Scf00031	1550932
bin81_41	Peaxi162Scf00429	80463
bin81_41	Peaxi162Scf00344	1744374
bin81_41	Peaxi162Scf00361	1001205
bin81_41	Peaxi162Scf00031	2703647
bin81_41	Peaxi162Scf00120	1272867
bin81_41	Peaxi162Scf00442	482778
bin81_41	Peaxi162Scf00254	256716
bin81_41	Peaxi162Scf00298	289923
bin81_41	Peaxi162Scf00159	878689
bin81_41	Peaxi162Scf00768	602035
bin81_41	Peaxi162Scf00112	1667149
bin81_41	Peaxi162Scf00025	2261689
bin81_41	Peaxi162Scf00159	981196
bin81_41	Peaxi162Scf00176	1268862
bin81_41	Peaxi162Scf00723	413025
bin81_41	Peaxi162Scf00085	1538300
bin81_41	Peaxi162Scf00554	354064
bin81_41	Peaxi162Scf00681	391295
bin81_41	Peaxi162Scf00875	460189
bin81_41	Peaxi162Scf00159	981188
bin81_41	Peaxi162Scf00036	2061962
bin81_41	Peaxi162Scf00321	80773
bin81_41	Peaxi162Scf00329	117207
bin81_41	Peaxi162Scf00083	41309
bin81_41	Peaxi162Scf00527	463604
bin82_5	Peaxi162Scf00060	422133
bin82_5	Peaxi162Scf00060	549302
bin82_5	Peaxi162Scf00329	638598
bin82_5	Peaxi162Scf00760	277069
bin82_5	Peaxi162Scf00569	562450
bin83_69	Peaxi162Scf00147	1950735
bin83_69	Peaxi162Scf00159	878664
bin83_69	Peaxi162Scf00248	1077290
bin83_69	Peaxi162Scf00148	1526740
bin83_69	Peaxi162Scf00723	413034
bin83_69	Peaxi162Scf00896	34279
bin83_69	Peaxi162Scf00527	463618
bin83_69	Peaxi162Scf00036	1010074
bin83_69	Peaxi162Scf00298	1064704
bin83_69	Peaxi162Scf00875	460193
bin83_69	Peaxi162Scf00243	1172629
bin83_69	Peaxi162Scf00355	792446
bin83_69	Peaxi162Scf00036	1010118
bin83_69	Peaxi162Scf00085	1538251
bin83_69	Peaxi162Scf00173	878901
bin83_69	Peaxi162Scf00298	289972
bin83_69	Peaxi162Scf00178	418840
bin83_69	Peaxi162Scf00036	2061914
bin83_69	Peaxi162Scf00083	1229
bin83_69	Peaxi162Scf01186	162822
bin83_69	Peaxi162Scf00244	276567
bin83_69	Peaxi162Scf00376	678485
bin83_69	Peaxi162Scf00120	735139
bin83_69	Peaxi162Scf00205	749406
bin83_69	Peaxi162Scf00150	381649
bin83_69	Peaxi162Scf00524	264045
bin83_69	Peaxi162Scf00082	1383577
bin83_69	Peaxi162Scf00085	1648505
bin83_69	Peaxi162Scf00125	299786
bin83_69	Peaxi162Scf01093	227815
bin83_69	Peaxi162Scf00321	80786
bin83_69	Peaxi162Scf00083	41378
bin83_69	Peaxi162Scf00962	65836
bin83_69	Peaxi162Scf00244	97596
bin83_69	Peaxi162Scf00552	161274
bin83_69	Peaxi162Scf00224	693965
bin83_69	Peaxi162Scf00337	828821
bin83_69	Peaxi162Scf00120	1272909
bin83_69	Peaxi162Scf00034	1472734
bin83_69	Peaxi162Scf00178	418831
bin83_69	Peaxi162Scf00205	755515
bin83_69	Peaxi162Scf00178	1274741
bin83_69	Peaxi162Scf00906	221564
bin83_69	Peaxi162Scf00926	526846
bin83_69	Peaxi162Scf03193	7031
bin83_69	Peaxi162Scf00298	95620
bin83_69	Peaxi162Scf00473	110663
bin83_69	Peaxi162Scf00145	581680
bin83_69	Peaxi162Scf00261	1573863
bin83_69	Peaxi162Scf00723	413049
bin83_69	Peaxi162Scf00224	1222500
bin83_69	Peaxi162Scf00021	2551847
bin83_69	Peaxi162Scf00244	602056
bin83_69	Peaxi162Scf00581	256985
bin83_69	Peaxi162Scf00120	1272869
bin83_69	Peaxi162Scf00120	1272886
bin83_69	Peaxi162Scf55972	183
bin83_69	Peaxi162Scf00354	804451
bin83_69	Peaxi162Scf00985	289683
bin83_69	Peaxi162Scf00337	932351
bin83_69	Peaxi162Scf00085	766654
bin83_69	Peaxi162Scf00630	739962
bin83_69	Peaxi162Scf00120	1272889
bin83_69	Peaxi162Scf00202	1466828
bin83_69	Peaxi162Scf00723	53019
bin83_69	Peaxi162Scf00063	2072487
bin83_69	Peaxi162Scf01009	127514
bin83_69	Peaxi162Scf00329	638661
bin83_69	Peaxi162Scf03193	7013
bin84_61	Peaxi162Scf00002	5475783
bin84_61	Peaxi162Scf00063	1280507
bin84_61	Peaxi162Scf00036	1010084
bin84_61	Peaxi162Scf00002	5475833
bin84_61	Peaxi162Scf00177	14316
bin84_61	Peaxi162Scf01187	134093
bin84_61	Peaxi162Scf00124	1335950
bin84_61	Peaxi162Scf00002	5475781
bin84_61	Peaxi162Scf00708	326305
bin84_61	Peaxi162Scf00085	1283058
bin84_61	Peaxi162Scf00147	387995
bin84_61	Peaxi162Scf00827	680232
bin84_61	Peaxi162Scf00361	744675
bin84_61	Peaxi162Scf00178	1062985
bin84_61	Peaxi162Scf00748	111865
bin84_61	Peaxi162Scf00179	796742
bin84_61	Peaxi162Scf00321	302261
bin84_61	Peaxi162Scf00248	931635
bin84_61	Peaxi162Scf00720	15988
bin84_61	Peaxi162Scf00329	638636
bin84_61	Peaxi162Scf00026	2375189
bin84_61	Peaxi162Scf00898	506218
bin84_61	Peaxi162Scf00248	561192
bin84_61	Peaxi162Scf00083	226289
bin84_61	Peaxi162Scf00796	276489
bin84_61	Peaxi162Scf00243	431314
bin84_61	Peaxi162Scf00827	680274
bin84_61	Peaxi162Scf00554	125066
bin84_61	Peaxi162Scf01105	317818
bin84_61	Peaxi162Scf00162	1252794
bin84_61	Peaxi162Scf00145	510470
bin84_61	Peaxi162Scf00234	348149
bin84_61	Peaxi162Scf01907	21213
bin84_61	Peaxi162Scf00195	802436
bin84_61	Peaxi162Scf00649	524824
bin84_61	Peaxi162Scf00159	906740
bin84_61	Peaxi162Scf00022	709576
bin84_61	Peaxi162Scf00554	514989
bin84_61	Peaxi162Scf00268	103353
bin84_61	Peaxi162Scf00380	243750
bin84_61	Peaxi162Scf00588	403751
bin84_61	Peaxi162Scf00321	206653
bin84_61	Peaxi162Scf00977	16820
bin84_61	Peaxi162Scf01235	47863
bin84_61	Peaxi162Scf00952	250241
bin84_61	Peaxi162Scf00025	2939076
bin84_61	Peaxi162Scf00760	174518
bin84_61	Peaxi162Scf00291	862910
bin84_61	Peaxi162Scf00099	1179107
bin84_61	Peaxi162Scf00380	332872
bin84_61	Peaxi162Scf00173	1024588
bin84_61	Peaxi162Scf00322	447915
bin84_61	Peaxi162Scf00224	693990
bin84_61	Peaxi162Scf00380	243765
bin84_61	Peaxi162Scf01391	273255
bin84_61	Peaxi162Scf00261	1050208
bin84_61	Peaxi162Scf00321	229970
bin84_61	Peaxi162Scf00244	568307
bin84_61	Peaxi162Scf00214	535521
bin84_61	Peaxi162Scf01106	172403
bin84_61	Peaxi162Scf00147	555140
bin85_27	Peaxi162Scf00354	573960
bin85_27	Peaxi162Scf00198	104712
bin85_27	Peaxi162Scf00082	1616749
bin85_27	Peaxi162Scf00911	135480
bin85_27	Peaxi162Scf00305	394300
bin85_27	Peaxi162Scf00112	1375160
bin85_27	Peaxi162Scf00225	814203
bin85_27	Peaxi162Scf00779	428214
bin85_27	Peaxi162Scf00954	419874
bin85_27	Peaxi162Scf00082	2365266
bin85_27	Peaxi162Scf00337	932328
bin85_27	Peaxi162Scf00537	503398
bin85_27	Peaxi162Scf00298	698077
bin85_27	Peaxi162Scf00001	737629
bin85_27	Peaxi162Scf01281	50574
bin85_27	Peaxi162Scf00952	410759
bin85_27	Peaxi162Scf00354	573905
bin85_27	Peaxi162Scf00224	300962
bin85_27	Peaxi162Scf00911	123960
bin85_27	Peaxi162Scf01050	353366
bin85_27	Peaxi162Scf00354	573922
bin85_27	Peaxi162Scf00034	446171
bin85_27	Peaxi162Scf00985	457308
bin85_27	Peaxi162Scf00748	14825
bin85_27	Peaxi162Scf00217	985324
bin85_27	Peaxi162Scf00329	638658
bin85_27	Peaxi162Scf00305	812096
bin86_1	Peaxi162Scf00198	287850
bin87_48	Peaxi162Scf00588	1300476
bin87_48	Peaxi162Scf00225	838315
bin87_48	Peaxi162Scf00337	932314
bin87_48	Peaxi162Scf00178	1629754
bin87_48	Peaxi162Scf00539	440560
bin87_48	Peaxi162Scf00078	1710476
bin87_48	Peaxi162Scf00244	887371
bin87_48	Peaxi162Scf00082	718504
bin87_48	Peaxi162Scf00150	381600
bin87_48	Peaxi162Scf00337	828812
bin87_48	Peaxi162Scf00768	84339
bin87_48	Peaxi162Scf00308	783210
bin87_48	Peaxi162Scf00705	412256
bin87_48	Peaxi162Scf00021	1937171
bin87_48	Peaxi162Scf00082	889017
bin87_48	Peaxi162Scf00082	2365285
bin87_48	Peaxi162Scf00380	332888
bin87_48	Peaxi162Scf00354	573933
bin87_48	Peaxi162Scf00001	712752
bin87_48	Peaxi162Scf00298	348349
bin87_48	Peaxi162Scf00079	1717381
bin87_48	Peaxi162Scf00717	52726
bin87_48	Peaxi162Scf00898	524782
bin87_48	Peaxi162Scf00721	134751
bin87_48	Peaxi162Scf00082	1803206
bin87_48	Peaxi162Scf00025	241922
bin87_48	Peaxi162Scf00322	447944
bin87_48	Peaxi162Scf00001	1491394
bin87_48	Peaxi162Scf00827	120779
bin87_48	Peaxi162Scf00085	2274207
bin87_48	Peaxi162Scf00952	250250
bin87_48	Peaxi162Scf00544	944598
bin87_48	Peaxi162Scf00097	2049818
bin87_48	Peaxi162Scf00736	522047
bin87_48	Peaxi162Scf00063	1025739
bin87_48	Peaxi162Scf00012	1450281
bin87_48	Peaxi162Scf00355	801006
bin87_48	Peaxi162Scf00308	331145
bin87_48	Peaxi162Scf00380	332904
bin87_48	Peaxi162Scf00589	333865
bin87_48	Peaxi162Scf00021	2253906
bin87_48	Peaxi162Scf00177	355584
bin87_48	Peaxi162Scf00224	1171044
bin87_48	Peaxi162Scf00256	681056
bin87_48	Peaxi162Scf00112	1841070
bin87_48	Peaxi162Scf00202	1466820
bin87_48	Peaxi162Scf00796	145267
bin87_48	Peaxi162Scf00292	214562
bin88_525	Peaxi162Scf01050	219439
bin88_525	Peaxi162Scf00298	1150728
bin88_525	Peaxi162Scf00554	310915
bin88_525	Peaxi162Scf00376	596318
bin88_525	Peaxi162Scf00717	63195
bin88_525	Peaxi162Scf01425	122360
bin88_525	Peaxi162Scf00533	270571
bin88_525	Peaxi162Scf00177	215649
bin88_525	Peaxi162Scf00308	1058481
bin88_525	Peaxi162Scf00025	401128
bin88_525	Peaxi162Scf00036	2098180
bin88_525	Peaxi162Scf00564	645313
bin88_525	Peaxi162Scf01050	219377
bin88_525	Peaxi162Scf00022	237187
bin88_525	Peaxi162Scf00202	1027296
bin88_525	Peaxi162Scf01425	215000
bin88_525	Peaxi162Scf01235	47840
bin88_525	Peaxi162Scf00217	708627
bin88_525	Peaxi162Scf00223	1016593
bin88_525	Peaxi162Scf00254	775042
bin88_525	Peaxi162Scf00611	722302
bin88_525	Peaxi162Scf00462	87542
bin88_525	Peaxi162Scf00329	285859
bin88_525	Peaxi162Scf01050	218812
bin88_525	Peaxi162Scf00112	1375135
bin88_525	Peaxi162Scf00262	1570157
bin88_525	Peaxi162Scf00147	555154
bin88_525	Peaxi162Scf00344	1986445
bin88_525	Peaxi162Scf00262	158867
bin88_525	Peaxi162Scf00082	889012
bin88_525	Peaxi162Scf00554	833366
bin88_525	Peaxi162Scf00708	50962
bin88_525	Peaxi162Scf00522	362793
bin88_525	Peaxi162Scf00706	491476
bin88_525	Peaxi162Scf00898	524743
bin88_525	Peaxi162Scf00099	224366
bin88_525	Peaxi162Scf00835	365070
bin88_525	Peaxi162Scf00768	84295
bin88_525	Peaxi162Scf00697	642000
bin88_525	Peaxi162Scf00079	1825114
bin88_525	Peaxi162Scf00717	63222
bin88_525	Peaxi162Scf00554	125083
bin88_525	Peaxi162Scf00952	250203
bin88_525	Peaxi162Scf00177	14332
bin88_525	Peaxi162Scf00177	600899
bin88_525	Peaxi162Scf01346	92142
bin88_525	Peaxi162Scf00322	1495779
bin88_525	Peaxi162Scf00554	1054364
bin88_525	Peaxi162Scf00177	600928
bin88_525	Peaxi162Scf00911	117946
bin88_525	Peaxi162Scf00539	458396
bin88_525	Peaxi162Scf00706	487030
bin88_525	Peaxi162Scf00334	1216289
bin88_525	Peaxi162Scf00681	418832
bin88_525	Peaxi162Scf00473	110689
bin88_525	Peaxi162Scf00131	828804
bin88_525	Peaxi162Scf00305	868662
bin88_525	Peaxi162Scf00218	1744524
bin88_525	Peaxi162Scf00250	103269
bin88_525	Peaxi162Scf00376	182798
bin88_525	Peaxi162Scf00376	577669
bin88_525	Peaxi162Scf00736	123949
bin88_525	Peaxi162Scf00298	861497
bin88_525	Peaxi162Scf00322	447956
bin88_525	Peaxi162Scf00248	982816
bin88_525	Peaxi162Scf00085	530195
bin88_525	Peaxi162Scf00178	600153
bin88_525	Peaxi162Scf00321	206634
bin88_525	Peaxi162Scf01492	117613
bin88_525	Peaxi162Scf00768	549504
bin88_525	Peaxi162Scf00473	110669
bin88_525	Peaxi162Scf00334	1101322
bin88_525	Peaxi162Scf00178	1062986
bin88_525	Peaxi162Scf00978	367228
bin88_525	Peaxi162Scf00354	903675
bin88_525	Peaxi162Scf00558	510819
bin88_525	Peaxi162Scf00720	368950
bin88_525	Peaxi162Scf01189	126384
bin88_525	Peaxi162Scf00768	549558
bin88_525	Peaxi162Scf00708	238236
bin88_525	Peaxi162Scf00926	526863
bin88_525	Peaxi162Scf00178	1068045
bin88_525	Peaxi162Scf02148	75883
bin88_525	Peaxi162Scf00162	885727
bin88_525	Peaxi162Scf00179	657985
bin88_525	Peaxi162Scf00634	341686
bin88_525	Peaxi162Scf00544	716710
bin88_525	Peaxi162Scf01168	20968
bin88_525	Peaxi162Scf00262	825407
bin88_525	Peaxi162Scf00261	1573927
bin88_525	Peaxi162Scf00256	1340079
bin88_525	Peaxi162Scf00205	755517
bin88_525	Peaxi162Scf00159	110653
bin88_525	Peaxi162Scf00527	139496
bin88_525	Peaxi162Scf00031	2074327
bin88_525	Peaxi162Scf00026	2052897
bin88_525	Peaxi162Scf00708	383776
bin88_525	Peaxi162Scf00099	1260931
bin88_525	Peaxi162Scf00025	2939067
bin88_525	Peaxi162Scf00028	502844
bin88_525	Peaxi162Scf00112	381302
bin88_525	Peaxi162Scf00298	667429
bin88_525	Peaxi162Scf00705	156053
bin88_525	Peaxi162Scf00078	1911218
bin88_525	Peaxi162Scf00177	491877
bin88_525	Peaxi162Scf00085	1579952
bin88_525	Peaxi162Scf01492	117608
bin88_525	Peaxi162Scf00624	1021831
bin88_525	Peaxi162Scf00624	828104
bin88_525	Peaxi162Scf00380	332884
bin88_525	Peaxi162Scf00178	138584
bin88_525	Peaxi162Scf00768	84316
bin88_525	Peaxi162Scf00022	2629779
bin88_525	Peaxi162Scf00725	305843
bin88_525	Peaxi162Scf00262	158856
bin88_525	Peaxi162Scf00554	1054366
bin88_525	Peaxi162Scf00178	1131332
bin88_525	Peaxi162Scf00768	528399
bin88_525	Peaxi162Scf00083	80182
bin88_525	Peaxi162Scf01050	353378
bin88_525	Peaxi162Scf00254	987488
bin88_525	Peaxi162Scf01050	219436
bin88_525	Peaxi162Scf00544	1068877
bin88_525	Peaxi162Scf00298	717897
bin88_525	Peaxi162Scf00112	940792
bin88_525	Peaxi162Scf00162	456319
bin88_525	Peaxi162Scf00355	576134
bin88_525	Peaxi162Scf00178	1731615
bin88_525	Peaxi162Scf01050	219434
bin88_525	Peaxi162Scf01168	20999
bin88_525	Peaxi162Scf00482	182419
bin88_525	Peaxi162Scf00952	198039
bin88_525	Peaxi162Scf01184	147693
bin88_525	Peaxi162Scf00243	1257737
bin88_525	Peaxi162Scf00112	222151
bin88_525	Peaxi162Scf00031	2954088
bin88_525	Peaxi162Scf00001	1771288
bin88_525	Peaxi162Scf00723	386221
bin88_525	Peaxi162Scf00382	683802
bin88_525	Peaxi162Scf00036	1534658
bin88_525	Peaxi162Scf00322	447942
bin88_525	Peaxi162Scf00931	486704
bin88_525	Peaxi162Scf00681	391358
bin88_525	Peaxi162Scf00705	412240
bin88_525	Peaxi162Scf00581	37147
bin88_525	Peaxi162Scf00082	1408855
bin88_525	Peaxi162Scf00321	206645
bin88_525	Peaxi162Scf00522	383193
bin88_525	Peaxi162Scf00012	2624456
bin88_525	Peaxi162Scf00042	378609
bin88_525	Peaxi162Scf00898	343653
bin88_525	Peaxi162Scf00954	28077
bin88_525	Peaxi162Scf00322	1579303
bin88_525	Peaxi162Scf00354	833109
bin88_525	Peaxi162Scf00012	1741105
bin88_525	Peaxi162Scf00724	301922
bin88_525	Peaxi162Scf00025	499160
bin88_525	Peaxi162Scf00042	135186
bin88_525	Peaxi162Scf00537	570628
bin88_525	Peaxi162Scf00010	3374218
bin88_525	Peaxi162Scf00624	609083
bin88_525	Peaxi162Scf00150	314837
bin88_525	Peaxi162Scf00564	591869
bin88_525	Peaxi162Scf00527	411327
bin88_525	Peaxi162Scf00085	2286499
bin88_525	Peaxi162Scf00379	39698
bin88_525	Peaxi162Scf00555	943581
bin88_525	Peaxi162Scf00298	155870
bin88_525	Peaxi162Scf00321	38548
bin88_525	Peaxi162Scf00527	129006
bin88_525	Peaxi162Scf00931	486638
bin88_525	Peaxi162Scf00985	389946
bin88_525	Peaxi162Scf00827	183495
bin88_525	Peaxi162Scf00256	1478637
bin88_525	Peaxi162Scf00705	156031
bin88_525	Peaxi162Scf01050	218810
bin88_525	Peaxi162Scf00608	61084
bin88_525	Peaxi162Scf00827	525977
bin88_525	Peaxi162Scf00522	481290
bin88_525	Peaxi162Scf01091	63670
bin88_525	Peaxi162Scf00708	38815
bin88_525	Peaxi162Scf00205	340319
bin88_525	Peaxi162Scf00261	31622
bin88_525	Peaxi162Scf00334	1211013
bin88_525	Peaxi162Scf00736	542997
bin88_525	Peaxi162Scf00259	162485
bin88_525	Peaxi162Scf00082	1611290
bin88_525	Peaxi162Scf00132	1228546
bin88_525	Peaxi162Scf00522	595961
bin88_525	Peaxi162Scf00220	757561
bin88_525	Peaxi162Scf00082	1616670
bin88_525	Peaxi162Scf00205	671143
bin88_525	Peaxi162Scf00811	534182
bin88_525	Peaxi162Scf00223	480647
bin88_525	Peaxi162Scf00429	517048
bin88_525	Peaxi162Scf00234	657821
bin88_525	Peaxi162Scf01168	21004
bin88_525	Peaxi162Scf00028	502871
bin88_525	Peaxi162Scf00120	1600448
bin88_525	Peaxi162Scf00248	931626
bin88_525	Peaxi162Scf00418	310991
bin88_525	Peaxi162Scf00036	2011826
bin88_525	Peaxi162Scf00952	250270
bin88_525	Peaxi162Scf00001	1771266
bin88_525	Peaxi162Scf00564	539138
bin88_525	Peaxi162Scf00952	250225
bin88_525	Peaxi162Scf00985	389989
bin88_525	Peaxi162Scf00779	417611
bin88_525	Peaxi162Scf00262	669999
bin88_525	Peaxi162Scf00262	158807
bin88_525	Peaxi162Scf00099	576078
bin88_525	Peaxi162Scf00148	458125
bin88_525	Peaxi162Scf00036	449804
bin88_525	Peaxi162Scf00042	378621
bin88_525	Peaxi162Scf00031	2224497
bin88_525	Peaxi162Scf00940	42550
bin88_525	Peaxi162Scf00147	555161
bin88_525	Peaxi162Scf00148	458121
bin88_525	Peaxi162Scf00581	256995
bin88_525	Peaxi162Scf00796	80330
bin88_525	Peaxi162Scf00371	290233
bin88_525	Peaxi162Scf00063	819060
bin88_525	Peaxi162Scf00429	175103
bin88_525	Peaxi162Scf00376	75871
bin88_525	Peaxi162Scf01492	102100
bin88_525	Peaxi162Scf00063	1472926
bin88_525	Peaxi162Scf00162	1252801
bin88_525	Peaxi162Scf01346	92190
bin88_525	Peaxi162Scf00558	520250
bin88_525	Peaxi162Scf00539	541042
bin88_525	Peaxi162Scf00112	940786
bin88_525	Peaxi162Scf00296	723545
bin88_525	Peaxi162Scf00202	1411578
bin88_525	Peaxi162Scf00178	345696
bin88_525	Peaxi162Scf00025	1981138
bin88_525	Peaxi162Scf00220	1103740
bin88_525	Peaxi162Scf01168	20983
bin88_525	Peaxi162Scf00589	139289
bin88_525	Peaxi162Scf00588	403755
bin88_525	Peaxi162Scf00162	858437
bin88_525	Peaxi162Scf00588	375786
bin88_525	Peaxi162Scf00748	760989
bin88_525	Peaxi162Scf00205	653896
bin88_525	Peaxi162Scf00176	1260103
bin88_525	Peaxi162Scf00724	569559
bin88_525	Peaxi162Scf00158	863502
bin88_525	Peaxi162Scf00305	794067
bin88_525	Peaxi162Scf00262	670038
bin88_525	Peaxi162Scf00305	263437
bin88_525	Peaxi162Scf00262	81563
bin88_525	Peaxi162Scf00322	447877
bin88_525	Peaxi162Scf00224	208455
bin88_525	Peaxi162Scf00008	268
bin88_525	Peaxi162Scf00705	412218
bin88_525	Peaxi162Scf00205	755482
bin88_525	Peaxi162Scf00827	183512
bin88_525	Peaxi162Scf00382	537280
bin88_525	Peaxi162Scf00148	772974
bin88_525	Peaxi162Scf00317	684580
bin88_525	Peaxi162Scf00097	1985495
bin88_525	Peaxi162Scf00063	296902
bin88_525	Peaxi162Scf00085	2459800
bin88_525	Peaxi162Scf00040	73482
bin88_525	Peaxi162Scf00225	715894
bin88_525	Peaxi162Scf00131	885812
bin88_525	Peaxi162Scf00954	329114
bin88_525	Peaxi162Scf01192	18955
bin88_525	Peaxi162Scf00026	1545419
bin88_525	Peaxi162Scf00954	227043
bin88_525	Peaxi162Scf00768	528348
bin88_525	Peaxi162Scf74484	760
bin88_525	Peaxi162Scf00717	52689
bin88_525	Peaxi162Scf01106	172410
bin88_525	Peaxi162Scf00017	497067
bin88_525	Peaxi162Scf00334	615417
bin88_525	Peaxi162Scf00736	282662
bin88_525	Peaxi162Scf00962	63961
bin88_525	Peaxi162Scf00440	55706
bin88_525	Peaxi162Scf00025	2198401
bin88_525	Peaxi162Scf00205	159301
bin88_525	Peaxi162Scf00736	543006
bin88_525	Peaxi162Scf00322	302881
bin88_525	Peaxi162Scf00112	2110413
bin88_525	Peaxi162Scf00268	103314
bin88_525	Peaxi162Scf00371	247477
bin88_525	Peaxi162Scf00768	300878
bin88_525	Peaxi162Scf00554	607825
bin88_525	Peaxi162Scf00220	928184
bin88_525	Peaxi162Scf00748	760983
bin88_525	Peaxi162Scf00462	932423
bin88_525	Peaxi162Scf00418	352556
bin88_525	Peaxi162Scf00083	65250
bin88_525	Peaxi162Scf00954	419898
bin88_525	Peaxi162Scf01271	123858
bin88_525	Peaxi162Scf00305	126119
bin88_525	Peaxi162Scf00760	57437
bin88_525	Peaxi162Scf00706	486995
bin88_525	Peaxi162Scf00371	55162
bin88_525	Peaxi162Scf00760	93057
bin88_525	Peaxi162Scf00177	203851
bin88_525	Peaxi162Scf00305	263438
bin88_525	Peaxi162Scf00724	85452
bin88_525	Peaxi162Scf00926	526899
bin88_525	Peaxi162Scf00179	1025977
bin88_525	Peaxi162Scf00708	545797
bin88_525	Peaxi162Scf00244	887372
bin88_525	Peaxi162Scf00570	104764
bin88_525	Peaxi162Scf00681	265617
bin88_525	Peaxi162Scf00179	657967
bin88_525	Peaxi162Scf00012	2474670
bin88_525	Peaxi162Scf00940	245084
bin88_525	Peaxi162Scf00552	51480
bin88_525	Peaxi162Scf00031	2240321
bin88_525	Peaxi162Scf00337	342806
bin88_525	Peaxi162Scf00321	38593
bin88_525	Peaxi162Scf00527	411344
bin88_525	Peaxi162Scf00120	737373
bin88_525	Peaxi162Scf00720	66512
bin88_525	Peaxi162Scf00217	1302165
bin88_525	Peaxi162Scf00248	706473
bin88_525	Peaxi162Scf00120	895638
bin88_525	Peaxi162Scf00827	183475
bin88_525	Peaxi162Scf00724	367487
bin88_525	Peaxi162Scf00202	1299350
bin88_525	Peaxi162Scf00124	1335989
bin88_525	Peaxi162Scf00954	329153
bin88_525	Peaxi162Scf00760	68090
bin88_525	Peaxi162Scf00681	265546
bin88_525	Peaxi162Scf00119	1565297
bin88_525	Peaxi162Scf00787	438065
bin88_525	Peaxi162Scf00954	28087
bin88_525	Peaxi162Scf00147	438963
bin88_525	Peaxi162Scf00083	1205
bin88_525	Peaxi162Scf00261	1899399
bin88_525	Peaxi162Scf00779	613185
bin88_525	Peaxi162Scf00147	281130
bin88_525	Peaxi162Scf00112	500082
bin88_525	Peaxi162Scf00262	1518053
bin88_525	Peaxi162Scf00256	171234
bin88_525	Peaxi162Scf00611	386272
bin88_525	Peaxi162Scf00085	379853
bin88_525	Peaxi162Scf00025	2939063
bin88_525	Peaxi162Scf00321	302280
bin88_525	Peaxi162Scf00418	352554
bin88_525	Peaxi162Scf00344	1580491
bin88_525	Peaxi162Scf00539	819621
bin88_525	Peaxi162Scf00177	215647
bin88_525	Peaxi162Scf00145	1452320
bin88_525	Peaxi162Scf00554	310912
bin88_525	Peaxi162Scf00558	366207
bin88_525	Peaxi162Scf00085	2381636
bin88_525	Peaxi162Scf00063	316076
bin88_525	Peaxi162Scf00962	154363
bin88_525	Peaxi162Scf00322	534096
bin88_525	Peaxi162Scf00250	488730
bin88_525	Peaxi162Scf00178	1731715
bin88_525	Peaxi162Scf00205	534735
bin88_525	Peaxi162Scf00099	882039
bin88_525	Peaxi162Scf00952	198021
bin88_525	Peaxi162Scf00760	174535
bin88_525	Peaxi162Scf00082	1632703
bin88_525	Peaxi162Scf00354	804403
bin88_525	Peaxi162Scf00112	408872
bin88_525	Peaxi162Scf00736	542959
bin88_525	Peaxi162Scf01184	147696
bin88_525	Peaxi162Scf00147	438920
bin88_525	Peaxi162Scf00827	183528
bin88_525	Peaxi162Scf00720	16043
bin88_525	Peaxi162Scf00085	766663
bin88_525	Peaxi162Scf00468	178461
bin88_525	Peaxi162Scf00021	2253955
bin88_525	Peaxi162Scf00954	128864
bin88_525	Peaxi162Scf00305	737008
bin88_525	Peaxi162Scf00321	326158
bin88_525	Peaxi162Scf00954	419889
bin88_525	Peaxi162Scf00624	828103
bin88_525	Peaxi162Scf01050	218738
bin88_525	Peaxi162Scf00796	144551
bin88_525	Peaxi162Scf00253	1255475
bin88_525	Peaxi162Scf01009	135159
bin88_525	Peaxi162Scf00292	655724
bin88_525	Peaxi162Scf01050	218807
bin88_525	Peaxi162Scf00159	878701
bin88_525	Peaxi162Scf00021	1777410
bin88_525	Peaxi162Scf00178	418216
bin88_525	Peaxi162Scf00681	265550
bin88_525	Peaxi162Scf00178	600121
bin88_525	Peaxi162Scf00539	819636
bin88_525	Peaxi162Scf00205	755488
bin88_525	Peaxi162Scf01281	32493
bin88_525	Peaxi162Scf01468	60050
bin88_525	Peaxi162Scf00001	1092960
bin88_525	Peaxi162Scf00898	420434
bin88_525	Peaxi162Scf00337	342771
bin88_525	Peaxi162Scf00429	601654
bin88_525	Peaxi162Scf00083	208041
bin88_525	Peaxi162Scf00624	959259
bin88_525	Peaxi162Scf00125	501828
bin88_525	Peaxi162Scf00262	158866
bin88_525	Peaxi162Scf00779	260325
bin88_525	Peaxi162Scf00250	488697
bin88_525	Peaxi162Scf01037	32118
bin88_525	Peaxi162Scf00842	19310
bin88_525	Peaxi162Scf00305	737027
bin88_525	Peaxi162Scf00120	758304
bin88_525	Peaxi162Scf00896	149139
bin88_525	Peaxi162Scf00262	669968
bin88_525	Peaxi162Scf01431	156202
bin88_525	Peaxi162Scf00705	412267
bin88_525	Peaxi162Scf00254	58222
bin88_525	Peaxi162Scf00779	547683
bin88_525	Peaxi162Scf00031	2477197
bin88_525	Peaxi162Scf00042	1088411
bin88_525	Peaxi162Scf01492	96645
bin88_525	Peaxi162Scf00099	1260878
[truncated: 4,292 more rows]

## Sheet: Sheet3
group	1
bin64_2	0
bin66_3	1.22
bin65_2	1.911
bin70_1	4.993
bin67_3	5.274
bin72_5	5.736
bin69_2	5.904
bin71_9	6.02
bin68_3	6.544
bin73_9	7.351
bin78_1	8.746
bin75_12	9.126
bin86_1	9.272
bin76_11	9.383
bin79_7	9.947
bin80_3	10.1
bin85_27	10.283
bin88_525_28_2	10.534
bin84_61_100_1	10.617
bin87_48_45_2	10.639
bin84_61_100_2	10.686
bin87_48_45_1	10.724
bin83_69_45_1	10.752
bin81_41_28_2	10.752
bin83_69_45_2	10.762
bin77_20	10.788
bin81_41_28_1	10.967
bin88_525_28_1	11.133
bin82_5	11.275
bin89_94_49_2	11.497
bin91_6	11.599
bin90_19	11.664
bin89_94_49_1	11.843
bin92_5	12.153
bin74_1	12.339
bin93_30	12.699
bin94_2	13.115
bin95_2	13.506
bin96_2	15.797
bin97_1	15.992
group	2
bin6_1	0
bin7_5	1.02
bin9_4	4.751
bin8_2	5.757
bin11_1	6.526
bin5_1	7.066
bin10_4	7.111
bin12_2	7.496
bin13_2	8.376
bin14_5	9.111
bin15_11	9.621
bin16_7	10.141
bin17_3	10.413
bin18_4	11.17
bin19_3	11.772
bin20_2	12.159
bin21_3	13.274
bin22_3	13.965
bin23_1	15.218
bin24_2	15.846
bin26_3	16.744
bin27_2	17.473
bin28_3	17.788
bin30_1	18.382
bin29_10	18.503
bin31_10	19.261
bin32_1	20.101
bin42_5	20.38
bin41_3	20.571
bin39_7	20.638
bin43_2	20.712
bin40_5	20.854
bin44_4	20.981
bin45_9	21.075
bin47_11	21.393
bin51_9	21.798
bin52_48	22.113
bin59_1	22.238
bin53_107	22.352
bin57_33_253_2	22.399
bin57_33_253_1	22.514
bin56_26_229_2	22.544
bin54_152	22.564
bin56_26_229_1	22.564
bin62_124	22.758
bin58_12	22.758
bin60_29	22.76
bin55_14	22.794
bin61_3	22.833
bin50_8	22.995
bin49_8	23.01
bin48_10	23.289
bin33_4	23.447
bin34_7	23.576
bin36_8	23.576
bin35_5	23.775
bin37_2	23.853
bin38_3	23.943
bin46_13	24.261
bin25_3	24.381
bin4_1	31.99
bin2_2	33.921
bin3_202_229_1	34.059
bin3_202_229_2	34.109
bin1_2	36.035
bin63_260_253_2	36.409
bin63_260_253_1	36.599
group	3
bin98_12	0
bin99_2	0.512
bin100_3	1.146
bin102_6	2.914
bin103_2	3.45
bin104_1	4.317
bin101_1	5.884
bin105_7	14.276
bin106_3	20.69
bin107_1	23.745
bin108_1	24.48
bin109_4	26.068
bin110_2	26.965
bin111_2	30.987
bin112_12	31.901
bin113_3	33.776
bin114_7	34.673
bin115_2	36.224
bin116_1	36.999
bin117_3	38.772
bin118_4	39.752
bin119_6	41.686
bin120_1	42.989
bin121_2	43.987
bin122_8	44.378
bin123_1	46.039
bin124_3	46.415
bin125_3	47.982
bin128_16_310_1	48.694
bin128_16_310_2	48.83
bin127_4	49.167
bin126_7	49.457
bin129_2	51.129
bin130_5	52.008
bin131_3	52.155
bin132_1	53.127
bin133_3	54.942
bin134_9	55.661
bin135_2	55.996
bin136_3	58.603
bin137_1	59.149
bin138_2	59.701
bin139_1	60.784
bin140_10	61.32
bin141_4	61.837
bin142_3	62.194
bin143_2	63.239
bin144_1	63.949
bin145_1	64.825
bin146_1	65.11
bin147_3	65.848
bin149_6	66.144
bin148_2	66.251
bin151_5	66.836
bin150_3	66.986
bin152_4	67.669
bin153_1	68.373
bin154_3	69.174
bin155_3	71.474
bin156_4	71.874
bin157_6	72.987
bin158_2	73.328
bin169_1	73.553
bin161_14_267_2	74.041
bin161_14_267_1	74.178
bin160_9	74.274
bin162_5	74.482
bin159_15	74.661
bin183_1	74.726
bin182_17_237_2	74.928
bin182_17_237_1	75.008
bin181_35	75.143
bin178_112	75.254
bin179_69	75.3
bin177_199_237_2	75.405
bin177_199_237_1	75.502
bin180_16	75.53
bin175_22	75.646
bin172_1	75.769
bin176_17	75.88
bin174_55_296_2	75.955
bin174_55_296_1	76.026
bin164_64	76.104
bin168_6	76.225
bin173_12	76.324
bin170_12	76.412
bin171_14_39_2	76.509
bin166_17	76.557
bin163_1	76.618
bin171_14_39_1	76.781
bin165_1	77.136
bin167_4	77.374
group	4
bin184_2	0
bin185_1	1.696
bin186_1	3.832
bin187_4	4.352
bin188_3	7.56
bin190_1	7.798
bin189_2	8.053
bin191_2	9.6
bin192_1	10.553
bin193_1	11.421
bin195_4	12.258
bin194_4	12.687
bin196_2	13.729
bin197_3	14.785
bin198_1	18.904
bin199_3	19.289
bin200_2	19.675
bin202_1	21.806
bin201_1	21.94
bin226_1	25.022
bin229_48	25.451
bin221_1	25.573
bin210_117_218_4_2_2	25.699
bin223_81	25.861
bin222_330_313_1	25.997
bin210_117_218_4_1_2	26.045
bin222_330_313_2	26.142
bin210_117_218_4_2_1	26.174
bin209_28	26.249
bin211_76	26.308
bin210_117_218_4_1_1	26.308
bin224_5	26.417
bin213_22	26.467
bin225_5	26.497
bin227_8	26.502
bin212_1	26.526
bin208_7	26.756
bin230_40	26.947
bin228_15	27.179
bin207_2	27.494
bin206_4	27.839
bin205_4	28.139
bin204_3	28.701
bin203_3	28.898
bin220_5	31.668
bin219_2	31.888
bin218_4	34.585
bin231_1	36.624
bin217_3	38.6
bin214_1	41.098
bin216_1	42.024
bin215_1	47.174
group	5
bin285_1	0
bin286_5	3.951
bin287_1	4.987
bin288_1	8.376
bin289_2	9.782
bin290_8	10.333
bin291_5	10.426
bin292_38	10.984
bin293_10	11.625
bin303_4	12.186
bin302_49	12.269
bin301_62_14_156_1_1	12.403
bin300_184	12.453
bin301_62_14_156_2_1	12.453
bin298_84	12.453
bin297_219	12.523
bin301_62_14_156_2_2	12.76
bin301_62_14_156_1_2	12.877
bin294_29_193_2	12.901
bin296_22	12.901
bin294_29_193_1	12.974
bin299_1	13.523
bin295_2	14.052
bin304_1	17.879
bin305_2	19.821
bin306_1	21.595
group	6
bin232_4	0
bin233_2	1.626
bin234_1	5.218
bin235_5	8.174
bin236_1	10.338
bin237_2	13.635
bin238_1	20.438
bin239_2	21.554
bin240_5	22.341
bin241_1	23.214
bin242_3	24.002
bin243_3	25.132
bin244_6	26.647
bin245_7	26.892
bin246_3	27.056
bin247_3	27.633
bin248_11_176_1	28.6
bin248_11_176_2	28.86
bin268_9	29.219
bin267_3	29.67
bin279_5	31.48
bin278_9	31.921
bin276_7	32.195
259_236_46_42_97_122	32.398
bin261_19	32.398
259_236_46_42_97_121	32.462
259_236_46_42_97_222	32.544
259_236_46_42_97_112	32.57
bin262_163	32.61
259_236_46_42_97_111	32.649
259_236_46_42_97_212	32.73
259_236_46_42_97_221	32.806
259_236_46_42_97_211	32.851
bin263_50_86_2	33.035
bin275_83	33.163
bin274_33	33.233
bin263_50_86_1	33.384
bin277_2	33.5
bin260_6	33.658
bin258_6_241_1	33.948
bin273_3	34.267
bin258_6_241_2	34.27
bin257_13	34.355
bin264_1	34.523
bin265_5	34.704
bin272_3_88_2	34.826
bin272_3_88_1	34.957
bin271_2	35.065
bin256_12	35.185
bin254_7	35.234
bin266_11	35.247
bin255_3	35.57
bin250_5	35.755
bin251_3	35.963
bin253_20	35.994
bin252_5	36.335
bin249_4	36.488
bin270_1	37.141
bin269_1	37.295
bin280_9	38.36
bin281_1	39.593
bin282_3	40.185
bin283_2	42.802
bin284_1	42.973
group	7
bin310_1	0
bin309_2	1.02
bin311_1	1.739
bin307_2	2.504
bin308_1	3.479
bin319_1	19.722
bin318_1	20.874
bin317_1	21.563
bin316_1	21.827
bin315_1	23.193
bin314_2	23.761
bin312_5	24.894
bin313_1	25.438
bin320_2	29.202
bin322_1	30.764
bin324_45	31.331
bin321_181_263_2	31.506
bin323_216	31.506
bin321_181_263_1	31.62
bin325_147_169_2	31.62
bin325_147_169_1	31.868
bin327_49_49_2	31.994
bin327_49_49_1	32.179
bin326_1	32.391
bin328_5	32.651
bin329_7	33.212
bin330_7	35.371
